# Supplementary material for: A machine learning approach to quantify the specificity of colour–emotion associations and their cultural differences
Source: R Soc Open Sci. 2019 Sep 25;6(9):190741. doi: 10.1098/rsos.190741 (PMC6774957; doi:10.1098/rsos.190741)
Supplement: Data set for the manuscript "A machine learning approach to quantifying the specificity of color-emotion associations and their cultural differences" [file rsos190741supp1.csv]

lang	subject	color	admiration	amusement	anger	compassion	contempt	contentment	disappointment	disgust	fear	guilt	hate	interest	joy	love	pleasure	pride	regret	relief	sadness	shame
cn	550b7af71f955	black	0	0	0	0	0	0	0	0	0	0	0	0	0	0	0	0	3	0	0	0
cn	550b7af71f955	blue	0	4	0	0	0	0	0	0	0	0	0	0	0	0	0	0	0	0	0	0
cn	550b7af71f955	brown	0	0	0	0	0	2	0	0	0	0	0	0	0	0	0	0	0	0	0	0
cn	550b7af71f955	green	3	0	0	0	0	0	0	0	0	0	0	0	0	0	0	0	0	0	0	0
cn	550b7af71f955	grey	0	0	0	0	0	0	2	0	0	0	0	0	0	0	0	0	0	0	0	0
cn	550b7af71f955	orange	0	0	0	0	0	0	0	0	0	0	0	0	0	0	0	4	0	0	0	0
cn	550b7af71f955	pink	0	0	0	0	0	0	0	0	0	0	0	0	0	0	5	0	0	0	0	0
cn	550b7af71f955	purple	0	0	0	0	0	4	0	0	0	0	0	0	0	0	0	0	0	0	0	0
cn	550b7af71f955	red	0	0	0	0	0	0	0	0	0	0	0	3	0	0	0	0	0	0	0	0
cn	550b7af71f955	turquoise	0	0	0	0	0	0	0	0	0	1	0	0	0	0	0	0	0	0	0	0
cn	550b7af71f955	white	0	0	0	0	0	0	0	0	0	0	0	0	0	0	0	0	0	0	1	0
cn	550b7af71f955	yellow	0	0	0	0	2	0	0	0	0	0	0	0	0	0	0	0	0	0	0	0
cn	5515920e148b3	black	0	0	0	0	0	0	0	3	0	3	4	0	0	0	0	0	0	0	0	0
cn	5515920e148b3	blue	0	0	0	0	0	0	0	0	0	0	0	0	0	0	3	0	0	0	0	0
cn	5515920e148b3	brown	0	0	0	0	0	3	0	0	0	0	0	0	0	0	0	0	0	0	0	0
cn	5515920e148b3	green	0	0	0	0	0	3	0	0	0	0	0	4	0	0	3	0	0	0	0	0
cn	5515920e148b3	grey	0	0	0	0	0	0	0	0	0	0	0	0	0	0	0	0	0	0	0	0
cn	5515920e148b3	orange	1	0	0	0	0	0	0	0	0	0	0	4	0	0	2	3	0	0	0	0
cn	5515920e148b3	pink	0	0	0	0	0	0	0	0	0	0	0	3	0	2	0	0	0	0	0	0
cn	5515920e148b3	purple	0	0	0	0	0	3	0	0	0	0	0	0	0	0	0	3	0	0	0	0
cn	5515920e148b3	red	0	0	5	0	0	0	0	0	0	0	0	0	0	0	0	0	0	0	0	0
cn	5515920e148b3	turquoise	0	0	0	0	0	0	0	0	0	0	0	0	0	0	0	0	0	2	0	0
cn	5515920e148b3	white	0	0	0	0	0	0	0	0	0	0	2	0	0	0	0	0	0	0	0	0
cn	5515920e148b3	yellow	0	0	0	0	0	0	0	0	0	0	0	4	0	0	3	0	0	0	0	0
cn	5543737e5c869	black	0	0	4	0	0	0	0	0	5	0	0	0	0	0	0	0	0	0	4	0
cn	5543737e5c869	blue	0	0	0	3	0	0	0	0	0	0	0	3	1	1	1	0	0	4	0	0
cn	5543737e5c869	brown	0	0	0	0	0	0	0	0	0	0	0	0	0	0	0	0	0	0	0	0
cn	5543737e5c869	green	0	3	0	0	0	4	0	0	0	0	0	3	3	0	4	3	0	0	0	0
cn	5543737e5c869	grey	0	0	0	0	0	0	5	3	4	4	0	0	0	0	0	0	4	0	4	0
cn	5543737e5c869	orange	0	4	0	0	0	0	0	0	0	0	0	2	4	0	3	3	0	0	0	0
cn	5543737e5c869	pink	0	4	0	0	0	0	0	0	0	0	0	0	4	5	4	0	0	0	0	0
cn	5543737e5c869	purple	2	0	2	0	0	0	0	0	1	0	0	2	1	0	0	3	0	0	0	0
cn	5543737e5c869	red	0	4	3	0	0	0	0	0	0	0	0	0	5	4	0	4	0	0	0	0
cn	5543737e5c869	turquoise	0	0	0	0	0	0	0	0	0	0	0	0	0	0	0	0	0	0	0	0
cn	5543737e5c869	white	0	0	0	0	0	0	0	0	0	0	0	0	0	0	0	0	0	0	1	0
cn	5543737e5c869	yellow	0	3	0	0	0	1	0	0	0	0	0	0	3	0	0	0	0	0	1	0
cn	55649256a782d	black	0	0	2	0	0	0	0	0	0	2	5	0	0	0	0	0	0	0	0	2
cn	55649256a782d	blue	0	0	0	1	0	3	0	0	0	0	0	0	0	0	0	0	0	0	0	0
cn	55649256a782d	brown	0	0	0	0	0	3	0	0	0	0	0	0	0	0	0	0	0	0	0	0
cn	55649256a782d	green	0	4	0	0	0	4	0	0	0	0	0	4	0	0	0	0	0	0	0	0
cn	55649256a782d	grey	0	0	0	0	0	0	0	0	0	0	0	0	0	0	0	0	0	0	0	0
cn	55649256a782d	orange	2	3	0	0	0	1	0	0	0	0	0	3	0	0	1	0	0	0	0	0
cn	55649256a782d	pink	2	2	0	0	0	0	0	0	0	0	0	3	1	3	2	0	0	0	0	0
cn	55649256a782d	purple	0	3	0	0	0	2	0	0	0	0	0	0	0	0	0	3	0	0	0	2
cn	55649256a782d	red	0	0	5	0	0	0	0	3	0	0	0	1	3	3	0	0	0	0	0	0
cn	55649256a782d	turquoise	0	0	0	0	0	0	0	0	0	0	0	0	0	0	0	0	0	3	0	0
cn	55649256a782d	white	0	0	0	0	0	0	0	0	4	0	0	0	0	0	0	0	0	0	0	0
cn	55649256a782d	yellow	0	0	0	0	0	0	3	0	0	0	2	0	0	0	0	0	0	0	2	0
cn	5564985409afb	black	0	0	0	0	0	0	3	4	4	3	3	0	0	0	0	0	0	0	0	0
cn	5564985409afb	blue	0	0	0	0	0	2	0	0	0	0	0	0	0	0	0	0	0	0	2	0
cn	5564985409afb	brown	0	0	0	0	0	0	0	0	0	0	0	0	0	0	0	0	0	0	0	0
cn	5564985409afb	green	0	0	0	0	5	0	0	0	0	0	0	0	0	0	0	0	0	0	0	0
cn	5564985409afb	grey	0	0	0	0	0	0	5	0	0	5	0	0	0	0	0	0	0	0	5	0
cn	5564985409afb	orange	0	1	0	0	0	4	0	0	0	0	0	1	1	0	1	4	0	0	0	0
cn	5564985409afb	pink	0	4	0	0	0	0	0	0	0	0	0	0	2	5	4	0	0	0	0	0
cn	5564985409afb	purple	0	0	0	0	0	0	0	0	0	1	0	0	0	0	0	0	0	0	0	0
cn	5564985409afb	red	4	0	0	3	0	0	0	0	0	0	0	0	0	4	0	0	0	0	0	0
cn	5564985409afb	turquoise	0	0	0	0	5	0	0	0	0	0	0	0	0	0	0	0	0	0	0	0
cn	5564985409afb	white	0	0	0	3	0	0	0	0	0	0	0	0	0	0	0	0	0	4	0	0
cn	5564985409afb	yellow	0	0	0	1	0	0	0	0	0	0	0	0	0	0	0	0	0	0	1	1
cn	5564988710dce	black	0	0	0	0	0	0	5	4	5	0	0	0	0	0	0	0	0	0	5	0
cn	5564988710dce	blue	0	4	0	0	0	5	0	0	0	0	0	5	4	5	4	5	0	0	0	0
cn	5564988710dce	brown	0	0	4	0	5	0	0	5	0	0	0	0	0	0	0	0	0	0	0	0
cn	5564988710dce	green	0	5	0	0	0	4	0	0	0	0	0	0	5	5	5	0	0	0	0	0
cn	5564988710dce	grey	0	0	0	4	0	0	0	4	4	0	0	0	0	0	0	0	0	3	0	0
cn	5564988710dce	orange	0	4	0	0	0	3	0	0	0	0	0	4	4	4	4	0	0	0	0	0
cn	5564988710dce	pink	3	4	0	0	0	5	0	0	0	0	0	0	4	5	0	0	0	0	0	0
cn	5564988710dce	purple	0	0	0	0	0	0	0	0	5	0	0	0	0	0	0	0	0	0	5	0
cn	5564988710dce	red	4	0	4	0	4	0	0	3	4	0	4	0	0	4	0	0	4	0	0	4
cn	5564988710dce	turquoise	0	0	4	0	0	0	0	0	3	3	0	0	0	0	0	0	0	0	0	0
cn	5564988710dce	white	0	0	0	0	0	0	0	0	5	0	0	0	0	0	0	0	0	0	5	0
cn	5564988710dce	yellow	4	5	0	4	0	5	0	0	0	0	0	3	5	4	5	0	0	0	0	0
cn	556498d253543	black	0	0	3	0	0	0	0	4	5	0	5	0	0	0	0	0	0	0	5	0
cn	556498d253543	blue	0	0	0	3	0	3	0	0	0	0	0	0	0	0	0	0	0	0	4	0
cn	556498d253543	brown	0	4	0	0	0	0	0	0	0	0	0	1	3	4	4	0	0	0	0	0
cn	556498d253543	green	0	3	0	0	0	4	0	0	0	0	0	0	3	0	3	0	0	4	0	0
cn	556498d253543	grey	0	0	2	3	0	0	0	0	0	0	5	0	0	0	0	0	0	2	5	0
cn	556498d253543	orange	2	5	0	0	0	4	0	0	0	0	0	0	5	2	5	4	0	0	0	0
cn	556498d253543	pink	2	4	0	0	0	5	0	0	0	0	0	4	4	5	4	0	0	0	0	0
cn	556498d253543	purple	0	0	0	0	0	0	0	0	0	0	0	0	0	3	0	0	0	0	2	0
cn	556498d253543	red	5	5	0	0	0	3	0	0	0	0	0	5	5	5	5	5	0	0	0	0
cn	556498d253543	turquoise	0	0	0	0	0	0	0	0	0	0	0	0	2	0	2	0	0	0	0	0
cn	556498d253543	white	0	0	0	4	3	0	0	0	0	0	3	0	0	0	0	0	0	3	0	0
cn	556498d253543	yellow	0	0	0	0	0	0	0	1	1	0	0	0	0	0	0	0	0	0	2	0
cn	556499ef7c8ea	black	0	0	0	0	0	0	3	4	0	0	4	0	0	0	0	0	3	0	0	3
cn	556499ef7c8ea	blue	0	0	0	3	0	0	0	0	0	0	0	0	0	0	0	0	0	0	3	0
cn	556499ef7c8ea	brown	0	0	3	0	0	0	0	3	0	0	3	0	0	0	0	0	0	0	0	0
cn	556499ef7c8ea	green	0	0	0	0	0	0	0	0	0	0	0	0	0	0	3	0	0	4	0	0
cn	556499ef7c8ea	grey	0	0	0	0	0	0	0	0	0	0	0	0	0	0	0	0	0	0	3	0
cn	556499ef7c8ea	orange	0	3	0	0	0	0	0	0	0	0	0	0	3	2	4	0	0	0	0	0
cn	556499ef7c8ea	pink	4	3	0	0	0	4	0	0	0	0	0	0	2	4	0	0	0	0	0	0
cn	556499ef7c8ea	purple	0	0	0	0	0	0	0	0	0	0	0	0	0	4	0	0	0	0	2	0
cn	556499ef7c8ea	red	0	4	4	0	0	0	0	0	0	0	0	0	0	4	0	0	0	0	0	0
cn	556499ef7c8ea	turquoise	0	0	0	0	0	0	0	0	0	0	0	0	0	0	3	0	0	0	0	0
cn	556499ef7c8ea	white	0	0	0	0	0	0	0	0	3	0	0	0	0	0	0	0	0	0	3	0
cn	556499ef7c8ea	yellow	0	0	0	0	0	0	0	0	0	0	0	3	0	0	0	4	0	0	0	0
cn	55649a4bb58e9	black	0	0	0	0	0	0	1	2	4	0	0	0	0	0	0	0	0	0	3	0
cn	55649a4bb58e9	blue	0	2	0	0	0	0	0	0	0	0	0	3	0	0	0	0	0	0	5	0
cn	55649a4bb58e9	brown	0	0	0	0	0	0	4	0	0	0	0	0	0	0	0	0	4	0	1	0
cn	55649a4bb58e9	green	0	3	0	0	0	0	0	0	0	0	0	2	0	0	0	0	0	0	0	0
cn	55649a4bb58e9	grey	0	0	0	0	0	0	3	3	3	4	2	0	0	0	0	0	4	0	3	0
cn	55649a4bb58e9	orange	3	5	0	0	0	5	0	0	0	0	0	4	5	2	5	3	0	0	0	0
cn	55649a4bb58e9	pink	3	3	0	0	0	4	0	0	0	0	0	4	3	3	3	0	0	0	0	0
cn	55649a4bb58e9	purple	0	0	1	0	3	0	0	2	1	0	4	0	0	0	0	0	0	0	1	0
cn	55649a4bb58e9	red	3	3	0	0	0	4	0	0	0	0	0	0	3	4	2	4	0	0	0	0
cn	55649a4bb58e9	turquoise	0	0	0	0	0	0	0	0	2	0	0	0	0	0	0	0	0	0	0	0
cn	55649a4bb58e9	white	0	0	0	3	0	0	4	0	0	0	0	0	0	0	0	0	3	0	4	0
cn	55649a4bb58e9	yellow	3	4	0	3	0	5	0	0	0	0	0	3	4	0	4	3	0	0	0	0
cn	55649f5c9a5a2	black	0	0	0	0	0	0	3	2	5	0	3	0	0	0	0	0	0	0	5	0
cn	55649f5c9a5a2	blue	0	0	0	4	0	0	0	0	0	4	0	0	0	0	0	0	0	0	5	0
cn	55649f5c9a5a2	brown	4	0	0	0	0	4	0	0	0	0	0	0	0	0	0	0	0	0	0	0
cn	55649f5c9a5a2	green	0	5	0	0	0	0	0	0	0	0	0	0	5	0	0	0	0	0	0	0
cn	55649f5c9a5a2	grey	0	0	0	0	0	0	5	0	0	5	0	0	0	0	0	0	4	0	0	5
cn	55649f5c9a5a2	orange	0	5	0	0	0	5	0	0	0	0	0	5	4	0	0	0	0	0	0	0
cn	55649f5c9a5a2	pink	0	0	0	0	0	5	0	0	0	0	0	0	0	0	5	0	0	0	0	0
cn	55649f5c9a5a2	purple	0	0	0	0	0	0	0	0	0	0	0	0	0	0	0	0	0	0	4	0
cn	55649f5c9a5a2	red	4	0	0	0	0	0	0	0	0	0	0	0	5	5	5	0	0	0	0	0
cn	55649f5c9a5a2	turquoise	3	3	0	0	0	3	0	0	0	0	0	0	4	0	4	0	0	0	0	0
cn	55649f5c9a5a2	white	0	0	0	0	0	0	0	0	0	0	0	0	0	0	0	0	0	5	0	0
cn	55649f5c9a5a2	yellow	0	4	0	0	0	5	0	0	0	0	0	0	4	0	4	4	0	0	0	0
cn	5564a503e7cc4	black	0	0	5	0	0	0	0	0	5	0	5	0	0	0	3	0	0	0	3	0
cn	5564a503e7cc4	blue	4	5	0	5	0	0	4	0	0	0	0	0	0	0	0	0	0	0	0	0
cn	5564a503e7cc4	brown	0	0	0	0	0	0	0	0	4	0	2	0	0	0	0	0	0	0	3	0
cn	5564a503e7cc4	green	0	3	0	5	0	4	0	0	0	0	0	0	0	0	0	0	0	0	0	0
cn	5564a503e7cc4	grey	0	0	0	0	5	0	0	0	0	5	0	0	0	0	0	0	0	0	5	0
cn	5564a503e7cc4	orange	0	0	0	0	0	5	0	0	0	0	0	3	5	0	5	0	0	0	0	0
cn	5564a503e7cc4	pink	0	3	0	0	0	0	0	0	0	0	0	0	0	5	1	0	0	0	0	0
cn	5564a503e7cc4	purple	3	0	0	0	1	0	0	0	0	0	0	0	0	2	2	0	0	0	0	0
cn	5564a503e7cc4	red	0	3	4	0	0	0	0	0	0	0	0	2	5	3	4	0	0	0	0	0
cn	5564a503e7cc4	turquoise	0	5	0	0	3	0	0	0	0	0	0	0	0	0	0	0	0	0	0	0
cn	5564a503e7cc4	white	0	0	0	4	2	0	0	0	5	4	0	0	0	0	0	0	0	0	5	0
cn	5564a503e7cc4	yellow	0	5	0	0	0	0	0	0	0	0	0	4	5	0	5	2	0	0	0	0
cn	5564a5923a54a	black	1	1	5	1	5	1	5	5	5	5	5	1	1	1	1	1	5	1	5	3
cn	5564a5923a54a	blue	4	4	1	5	1	5	1	1	1	5	1	3	5	2	5	4	1	5	5	1
cn	5564a5923a54a	brown	1	1	1	2	1	1	1	1	1	1	1	1	1	1	1	1	1	2	1	1
cn	5564a5923a54a	green	1	4	2	1	4	2	4	1	1	1	2	3	4	1	3	2	1	1	1	2
cn	5564a5923a54a	grey	1	1	1	4	1	1	5	1	1	5	1	1	1	1	1	1	5	4	5	5
cn	5564a5923a54a	orange	2	3	1	1	1	2	1	1	1	1	1	2	3	1	3	1	1	1	1	1
cn	5564a5923a54a	pink	4	4	1	1	1	4	1	1	1	1	1	4	4	4	4	3	1	2	1	1
cn	5564a5923a54a	purple	5	3	1	1	5	4	1	1	1	1	1	3	4	2	3	5	1	1	1	1
cn	5564a5923a54a	red	1	5	4	1	2	1	1	4	4	1	2	4	4	5	3	5	1	1	1	1
cn	5564a5923a54a	turquoise	2	3	1	5	1	2	1	1	1	3	1	2	2	2	2	2	3	3	4	2
cn	5564a5923a54a	white	1	1	1	3	1	1	3	1	5	2	1	1	1	1	1	1	5	3	4	2
cn	5564a5923a54a	yellow	5	5	1	5	1	5	1	1	1	4	1	5	5	3	5	3	2	2	5	3
cn	5564b778e6af4	black	0	0	5	0	0	0	0	3	5	0	4	0	0	0	0	0	0	0	3	0
cn	5564b778e6af4	blue	0	0	0	4	0	0	2	0	0	0	0	0	0	0	0	0	0	2	4	2
cn	5564b778e6af4	brown	0	4	0	0	0	4	0	0	0	0	0	0	0	0	0	0	0	0	0	0
cn	5564b778e6af4	green	5	0	0	4	0	0	0	0	0	0	0	5	5	0	5	0	0	0	0	0
cn	5564b778e6af4	grey	0	0	0	3	2	0	4	0	3	0	0	0	0	0	0	0	4	0	5	0
cn	5564b778e6af4	orange	4	5	0	0	0	3	0	0	0	0	0	4	5	0	0	3	0	0	0	0
cn	5564b778e6af4	pink	0	5	0	3	0	0	0	0	0	0	0	0	0	5	3	0	0	4	0	2
cn	5564b778e6af4	purple	0	0	0	0	0	0	0	3	0	0	3	0	0	0	0	4	0	0	0	0
cn	5564b778e6af4	red	3	4	5	3	0	0	0	0	0	0	0	0	4	5	4	0	0	0	0	4
cn	5564b778e6af4	turquoise	0	4	0	0	0	0	5	0	0	0	0	0	0	0	4	0	3	0	0	0
cn	5564b778e6af4	white	5	0	0	0	2	0	2	0	0	0	0	0	0	0	0	0	0	0	0	0
cn	5564b778e6af4	yellow	0	4	0	0	0	0	3	5	0	0	5	0	0	0	0	0	0	0	0	2
cn	5564fa26624b5	black	0	0	0	0	0	0	0	0	0	0	0	0	0	0	0	0	0	0	0	0
cn	5564fa26624b5	blue	0	5	0	0	0	0	0	0	0	0	0	0	0	0	0	0	0	0	0	0
cn	5564fa26624b5	brown	0	0	0	0	0	5	0	0	0	0	0	0	0	0	0	0	0	0	0	0
cn	5564fa26624b5	green	0	0	0	0	0	0	0	0	0	0	0	0	0	0	0	0	0	5	0	0
cn	5564fa26624b5	grey	0	0	0	0	0	0	0	0	0	0	0	0	0	0	0	0	0	5	0	0
cn	5564fa26624b5	orange	0	0	0	0	0	0	0	0	0	0	0	0	0	0	5	0	0	0	0	0
cn	5564fa26624b5	pink	0	0	0	0	0	0	0	0	0	0	0	0	0	5	3	0	0	0	0	0
cn	5564fa26624b5	purple	0	0	0	0	0	0	0	0	0	0	0	0	0	0	0	0	0	0	0	0
cn	5564fa26624b5	red	0	0	3	0	0	0	0	0	0	0	0	0	0	3	0	0	0	0	0	0
cn	5564fa26624b5	turquoise	0	0	0	0	0	0	0	0	0	0	0	0	0	0	0	0	0	0	0	0
cn	5564fa26624b5	white	0	0	0	0	0	5	0	0	0	0	0	0	0	0	0	0	0	0	0	0
cn	5564fa26624b5	yellow	0	0	0	0	0	0	0	0	2	0	0	0	4	0	0	0	0	0	0	0
cn	5565089bda6fd	black	0	0	0	0	0	0	4	0	3	0	0	0	0	0	0	0	0	0	0	0
cn	5565089bda6fd	blue	0	5	0	0	0	0	0	0	0	0	0	0	5	0	5	0	0	0	0	0
cn	5565089bda6fd	brown	0	0	0	0	0	0	0	0	0	0	0	0	0	0	0	0	0	0	0	0
cn	5565089bda6fd	green	0	0	0	4	0	0	0	0	0	0	0	0	0	0	3	0	0	3	0	0
cn	5565089bda6fd	grey	0	0	0	0	0	0	4	0	0	0	0	0	0	0	0	0	0	0	0	0
cn	5565089bda6fd	orange	0	0	0	4	0	0	0	0	0	0	0	0	0	4	0	0	0	0	0	0
cn	5565089bda6fd	pink	0	0	0	0	0	0	0	0	0	0	0	0	0	4	0	0	0	0	0	0
cn	5565089bda6fd	purple	4	0	0	0	0	0	0	0	0	0	0	0	0	0	0	4	0	0	0	0
cn	5565089bda6fd	red	0	0	0	0	0	4	0	0	0	0	0	4	0	0	0	5	0	0	0	0
cn	5565089bda6fd	turquoise	0	0	0	0	0	0	0	0	3	0	0	0	0	0	0	0	0	0	4	0
cn	5565089bda6fd	white	0	0	0	0	0	0	0	0	2	0	0	0	0	0	0	0	0	0	4	0
cn	5565089bda6fd	yellow	0	0	0	0	0	0	0	2	0	0	0	0	0	0	0	0	0	0	0	0
cn	55650abbd402c	black	0	0	0	0	0	0	0	4	5	0	0	0	0	0	0	0	0	0	0	0
cn	55650abbd402c	blue	0	3	0	0	0	0	0	0	0	3	0	0	0	0	0	0	0	0	4	0
cn	55650abbd402c	brown	4	0	0	0	0	4	0	0	0	0	0	0	0	0	0	5	0	0	0	0
cn	55650abbd402c	green	0	0	0	0	0	0	0	0	0	0	0	0	4	0	4	0	0	0	0	0
cn	55650abbd402c	grey	0	0	0	0	0	0	0	0	0	0	0	0	0	0	0	0	3	0	5	0
cn	55650abbd402c	orange	0	5	0	0	0	0	0	0	0	0	0	0	5	0	5	0	0	0	0	0
cn	55650abbd402c	pink	0	5	0	0	0	0	0	0	0	0	0	0	5	5	5	0	0	0	0	0
cn	55650abbd402c	purple	0	0	0	0	0	0	0	0	3	0	3	0	0	0	0	0	0	0	0	5
cn	55650abbd402c	red	0	0	0	0	0	4	0	0	0	0	0	0	0	5	4	0	0	0	0	0
cn	55650abbd402c	turquoise	0	0	0	0	0	0	0	3	0	0	3	0	0	0	0	0	0	0	0	5
cn	55650abbd402c	white	0	0	0	0	4	0	0	3	0	0	0	4	0	0	0	0	0	0	0	0
cn	55650abbd402c	yellow	0	3	0	0	0	0	0	0	0	0	0	4	3	0	3	0	0	0	0	0
cn	55650da5c6cca	black	0	0	0	0	0	0	0	0	0	0	0	0	0	0	0	0	3	0	2	0
cn	55650da5c6cca	blue	0	0	0	0	0	0	0	0	0	0	0	0	0	0	0	0	0	0	0	0
cn	55650da5c6cca	brown	0	0	0	0	0	0	0	3	0	0	0	0	0	0	0	0	0	0	0	0
cn	55650da5c6cca	green	0	0	0	0	0	0	0	0	0	0	0	4	0	0	0	0	0	0	0	0
cn	55650da5c6cca	grey	0	0	0	0	0	0	4	0	0	0	0	0	0	0	0	0	0	0	2	0
cn	55650da5c6cca	orange	5	5	0	0	0	0	0	0	0	0	0	0	0	0	0	0	0	0	0	0
cn	55650da5c6cca	pink	0	4	0	0	0	0	0	0	0	0	0	0	0	5	0	0	0	0	0	0
cn	55650da5c6cca	purple	0	0	0	0	0	0	0	0	0	0	0	0	0	0	4	0	0	0	0	0
cn	55650da5c6cca	red	0	0	0	0	0	0	0	0	0	0	0	0	3	0	0	0	0	0	0	0
cn	55650da5c6cca	turquoise	0	0	0	0	0	0	0	0	0	0	0	0	0	0	0	0	0	0	0	0
cn	55650da5c6cca	white	0	0	0	0	0	0	0	0	0	0	0	0	0	3	0	0	0	0	0	0
cn	55650da5c6cca	yellow	0	0	0	0	0	0	0	0	0	0	0	0	0	0	0	4	0	0	0	0
cn	55650db11e839	black	0	0	0	0	0	0	0	0	0	0	0	0	0	0	0	0	0	0	0	0
cn	55650db11e839	blue	0	0	0	0	0	0	0	0	0	0	0	0	0	0	0	0	0	0	2	0
cn	55650db11e839	brown	0	0	0	0	0	0	0	0	0	0	0	0	0	0	0	0	0	0	0	0
cn	55650db11e839	green	0	0	0	0	0	0	0	0	0	0	0	0	0	0	0	0	0	0	0	0
cn	55650db11e839	grey	0	0	0	0	0	0	2	0	0	0	0	0	0	0	0	0	0	0	0	0
cn	55650db11e839	orange	0	0	0	0	0	0	0	0	0	0	0	0	0	0	3	0	0	0	0	0
cn	55650db11e839	pink	0	0	0	0	0	0	0	0	0	0	0	0	2	0	0	0	0	0	0	0
cn	55650db11e839	purple	0	0	0	0	0	2	0	0	0	0	0	0	0	0	0	0	0	0	0	0
cn	55650db11e839	red	0	0	0	0	0	0	0	0	0	0	0	0	5	0	0	0	0	0	0	0
cn	55650db11e839	turquoise	0	0	0	0	0	0	0	0	0	0	0	0	0	0	0	0	0	0	0	0
cn	55650db11e839	white	0	0	0	0	0	0	0	0	0	0	0	0	0	0	0	0	0	0	0	0
cn	55650db11e839	yellow	0	5	0	0	0	0	0	0	0	0	0	0	0	0	0	0	0	0	0	0
cn	55650dd84fb03	black	0	0	0	0	0	0	0	0	3	0	0	0	0	0	0	0	0	0	0	0
cn	55650dd84fb03	blue	0	0	0	0	0	0	0	0	0	4	0	0	0	0	0	0	4	0	0	0
cn	55650dd84fb03	brown	0	5	0	0	0	0	0	0	0	0	0	0	0	0	0	0	0	0	0	0
cn	55650dd84fb03	green	0	0	0	0	0	0	0	4	0	0	0	0	0	0	0	0	0	0	0	0
cn	55650dd84fb03	grey	0	0	0	0	0	0	0	0	0	0	0	0	0	0	0	0	0	0	4	0
cn	55650dd84fb03	orange	0	0	0	0	0	0	0	0	0	0	0	5	0	0	0	0	0	0	0	0
cn	55650dd84fb03	pink	0	0	0	0	0	0	0	0	0	0	0	0	5	0	0	0	0	0	0	0
cn	55650dd84fb03	purple	0	0	0	0	0	0	0	0	4	0	0	0	0	0	0	0	0	0	0	0
cn	55650dd84fb03	red	0	0	0	0	0	0	0	0	0	0	0	0	0	5	0	0	0	0	0	0
cn	55650dd84fb03	turquoise	0	0	0	0	3	0	0	0	0	0	0	0	0	0	0	0	0	0	0	0
cn	55650dd84fb03	white	0	0	0	0	0	0	0	0	0	0	0	0	0	0	0	0	0	0	0	0
cn	55650dd84fb03	yellow	0	0	0	0	0	0	0	0	0	0	0	0	5	0	0	0	0	0	0	0
cn	5565113fcbf7a	black	0	0	0	0	5	0	4	4	5	0	5	0	0	0	0	0	0	5	0	0
cn	5565113fcbf7a	blue	0	5	0	0	0	0	0	0	0	0	0	0	5	0	4	0	0	4	0	0
cn	5565113fcbf7a	brown	0	0	5	0	4	0	0	0	0	0	0	0	0	0	0	0	0	0	0	0
cn	5565113fcbf7a	green	0	5	0	0	0	4	0	0	0	0	0	4	4	0	4	0	0	0	0	0
cn	5565113fcbf7a	grey	0	0	0	0	0	0	5	0	4	0	0	0	0	0	0	0	0	0	0	0
cn	5565113fcbf7a	orange	0	0	0	0	0	3	0	0	0	0	0	0	0	0	0	0	0	0	0	0
cn	5565113fcbf7a	pink	0	5	0	0	0	0	0	0	0	0	0	4	4	0	4	0	0	0	0	0
cn	5565113fcbf7a	purple	4	0	0	0	0	0	0	0	0	0	0	0	0	0	0	0	0	0	0	0
cn	5565113fcbf7a	red	0	0	0	4	0	0	0	0	0	0	4	0	0	5	0	0	0	0	0	0
cn	5565113fcbf7a	turquoise	0	4	0	0	0	4	0	0	0	0	0	0	4	0	4	0	0	0	0	0
cn	5565113fcbf7a	white	0	0	0	0	0	0	0	0	0	0	0	0	0	0	0	0	0	5	0	0
cn	5565113fcbf7a	yellow	0	0	0	0	0	0	0	0	0	0	0	0	0	0	0	0	0	0	0	0
cn	556515d816a7a	black	0	0	0	0	0	0	0	0	0	0	0	0	0	0	0	0	0	0	0	0
cn	556515d816a7a	blue	0	0	0	0	0	0	0	0	0	0	0	0	0	0	0	0	0	4	0	0
cn	556515d816a7a	brown	0	0	0	0	0	0	0	0	0	2	0	0	0	0	0	0	0	0	0	0
cn	556515d816a7a	green	0	0	0	0	0	0	0	0	0	0	0	0	0	0	5	0	0	0	0	0
cn	556515d816a7a	grey	0	0	0	0	0	0	4	0	0	0	0	0	0	0	0	0	0	0	0	0
cn	556515d816a7a	orange	0	0	0	0	0	0	0	0	0	0	0	5	0	0	0	0	0	0	0	0
cn	556515d816a7a	pink	3	0	0	0	0	0	0	0	0	0	0	0	0	0	0	0	0	0	0	0
cn	556515d816a7a	purple	0	0	0	0	0	0	3	0	0	0	0	0	0	0	0	0	0	0	0	0
cn	556515d816a7a	red	0	0	0	0	0	0	0	0	0	0	0	0	0	0	0	0	0	0	0	0
cn	556515d816a7a	turquoise	0	0	0	0	0	0	0	0	0	0	0	0	0	0	5	0	0	0	0	0
cn	556515d816a7a	white	0	0	0	0	0	0	0	0	0	0	0	0	0	0	0	0	0	0	0	0
cn	556515d816a7a	yellow	0	0	0	0	0	0	0	0	0	0	0	0	0	5	0	0	0	0	0	0
cn	5565165f36a22	black	0	0	5	0	0	0	5	5	5	0	5	0	0	0	0	0	0	0	0	0
cn	5565165f36a22	blue	0	0	0	0	0	0	0	0	0	5	0	0	0	0	0	0	0	0	3	0
cn	5565165f36a22	brown	0	0	4	0	0	0	0	2	0	0	0	0	0	0	0	0	0	0	0	0
cn	5565165f36a22	green	5	0	0	0	0	0	0	0	0	0	0	0	0	0	5	0	0	5	0	0
cn	5565165f36a22	grey	0	0	0	0	0	0	5	0	0	0	0	0	0	0	0	0	3	0	0	4
cn	5565165f36a22	orange	0	0	0	0	0	4	0	0	0	0	0	0	4	0	4	0	0	0	0	0
cn	5565165f36a22	pink	4	0	0	0	0	0	0	0	0	0	0	0	4	0	4	0	0	0	0	0
cn	5565165f36a22	purple	0	0	0	0	0	0	0	0	0	4	0	0	0	0	0	0	0	0	4	0
cn	5565165f36a22	red	0	0	0	0	0	0	0	0	0	0	0	0	0	5	0	0	0	0	0	5
cn	5565165f36a22	turquoise	5	0	0	0	0	0	0	0	0	0	0	0	0	0	0	0	0	3	0	0
cn	5565165f36a22	white	0	0	0	0	0	0	0	0	0	0	0	0	0	0	0	0	0	0	0	0
cn	5565165f36a22	yellow	0	0	0	0	0	2	5	0	0	0	0	0	0	0	5	0	0	0	0	0
cn	55651bdc56942	black	0	0	0	0	5	0	5	5	5	5	5	0	0	0	0	0	5	0	5	5
cn	55651bdc56942	blue	0	3	0	2	2	0	2	0	0	2	0	3	0	0	3	0	2	3	2	2
cn	55651bdc56942	brown	0	0	0	2	0	0	2	0	0	0	0	0	0	0	0	0	0	0	2	2
cn	55651bdc56942	green	2	2	0	3	2	2	2	0	0	2	0	3	2	2	2	2	2	5	2	2
cn	55651bdc56942	grey	0	0	1	5	4	0	5	3	2	5	3	0	0	0	0	0	5	2	5	5
cn	55651bdc56942	orange	4	4	0	1	0	4	0	0	0	0	0	4	5	4	5	4	0	3	0	0
cn	55651bdc56942	pink	3	5	0	2	0	3	0	0	0	0	0	5	5	4	5	3	0	4	0	0
cn	55651bdc56942	purple	0	0	0	0	0	0	4	3	2	0	3	0	0	0	0	0	0	0	0	4
cn	55651bdc56942	red	5	5	5	0	0	5	0	0	0	0	5	5	5	5	5	5	0	0	0	0
cn	55651bdc56942	turquoise	2	3	0	2	1	2	1	0	0	1	0	3	2	3	3	2	1	4	1	1
cn	55651bdc56942	white	0	0	0	4	1	0	3	1	2	4	0	0	0	0	0	0	4	0	0	4
cn	55651bdc56942	yellow	3	0	0	2	0	3	0	0	0	0	0	0	4	3	4	4	1	2	0	0
cn	556522bcd530a	black	0	0	0	0	0	0	0	0	0	0	1	0	0	0	0	0	0	0	2	0
cn	556522bcd530a	blue	0	4	0	0	0	0	0	0	0	0	0	0	0	0	0	0	0	0	0	0
cn	556522bcd530a	brown	0	0	0	0	0	0	3	0	0	0	0	0	0	0	0	0	3	0	0	3
cn	556522bcd530a	green	0	0	0	0	0	4	0	0	0	0	0	0	5	0	0	0	0	3	0	0
cn	556522bcd530a	grey	0	0	0	0	3	0	1	1	0	0	0	0	0	0	0	0	0	0	0	0
cn	556522bcd530a	orange	0	0	0	0	0	0	0	0	0	0	0	0	0	0	4	0	0	3	0	0
cn	556522bcd530a	pink	0	0	0	0	0	0	0	0	0	0	0	4	0	4	0	0	0	0	0	0
cn	556522bcd530a	purple	0	0	0	0	0	5	0	0	0	0	0	0	0	4	5	5	0	0	0	0
cn	556522bcd530a	red	3	0	0	0	0	0	0	0	0	0	0	0	0	4	0	0	0	0	0	0
cn	556522bcd530a	turquoise	0	0	0	0	0	4	0	0	0	0	0	0	0	0	0	0	0	0	0	0
cn	556522bcd530a	white	0	0	0	0	0	0	0	0	0	0	0	0	0	0	0	0	0	0	0	0
cn	556522bcd530a	yellow	0	0	0	3	0	0	0	0	0	3	0	0	0	0	0	0	0	0	2	0
cn	5565286f1ef52	black	0	0	0	0	0	0	3	0	0	0	0	0	0	0	0	0	0	0	0	0
cn	5565286f1ef52	blue	0	4	0	4	0	0	0	0	0	4	0	0	4	4	4	0	0	0	5	4
cn	5565286f1ef52	brown	0	0	0	0	0	0	0	2	3	0	0	0	0	0	0	0	0	0	0	0
cn	5565286f1ef52	green	0	5	0	0	0	0	0	0	0	0	0	5	5	3	5	0	0	4	0	0
cn	5565286f1ef52	grey	0	0	0	0	0	0	0	1	0	0	0	0	0	0	0	0	4	5	5	0
cn	5565286f1ef52	orange	5	5	0	0	0	5	0	0	0	0	0	5	5	5	5	5	0	5	0	0
cn	5565286f1ef52	pink	4	5	0	0	0	4	0	0	0	0	0	4	5	5	5	0	0	0	0	1
cn	5565286f1ef52	purple	0	0	0	0	0	0	0	0	0	0	0	2	0	0	0	0	0	0	0	0
cn	5565286f1ef52	red	0	4	0	0	0	0	0	0	1	0	0	0	3	5	4	0	0	0	0	0
cn	5565286f1ef52	turquoise	0	3	0	0	0	0	0	0	0	0	0	0	4	0	4	0	0	4	0	0
cn	5565286f1ef52	white	0	5	0	0	0	0	0	0	0	0	0	0	4	4	0	0	0	5	5	3
cn	5565286f1ef52	yellow	0	4	0	0	0	0	0	0	0	0	0	0	3	0	5	5	0	5	0	0
cn	55652b70d1233	black	0	0	0	0	0	0	5	0	5	5	0	0	0	0	0	0	5	0	5	5
cn	55652b70d1233	blue	0	0	0	0	0	0	3	0	0	0	0	0	0	0	0	0	0	0	4	0
cn	55652b70d1233	brown	0	0	0	0	0	0	0	0	0	0	0	0	0	0	0	0	0	0	0	0
cn	55652b70d1233	green	0	0	0	2	0	0	0	0	0	0	0	0	0	0	4	0	0	4	0	0
cn	55652b70d1233	grey	0	0	0	0	0	0	5	0	0	0	0	0	0	0	0	0	0	0	0	0
cn	55652b70d1233	orange	4	4	0	0	0	4	0	0	0	0	0	0	4	0	4	4	0	0	0	0
cn	55652b70d1233	pink	0	4	0	3	0	0	0	0	0	0	0	0	0	5	0	0	0	0	0	0
cn	55652b70d1233	purple	0	0	0	0	0	0	0	0	0	0	0	0	0	0	0	0	0	0	3	0
cn	55652b70d1233	red	3	3	4	0	0	3	0	0	0	0	4	0	0	3	0	3	0	0	0	0
cn	55652b70d1233	turquoise	0	0	0	0	0	0	0	0	0	0	0	0	0	0	0	0	0	3	0	3
cn	55652b70d1233	white	0	0	0	4	4	0	0	0	0	0	0	0	0	0	0	0	0	4	4	0
cn	55652b70d1233	yellow	4	3	0	0	0	4	0	0	0	0	0	0	5	0	5	0	0	0	0	0
cn	55652d434d39a	black	0	0	0	0	0	0	4	0	0	0	0	0	0	0	0	0	3	0	0	0
cn	55652d434d39a	blue	0	3	0	0	0	0	0	0	0	0	0	0	3	0	3	0	0	4	1	0
cn	55652d434d39a	brown	0	0	0	0	0	0	0	0	0	0	0	0	0	0	0	0	4	0	0	4
cn	55652d434d39a	green	4	2	0	4	0	4	0	0	0	0	0	2	2	3	1	3	0	5	0	0
cn	55652d434d39a	grey	0	0	0	0	1	0	5	3	1	0	0	0	0	0	0	0	2	0	4	0
cn	55652d434d39a	orange	5	3	2	2	0	4	0	0	0	0	0	3	4	5	4	3	0	0	0	0
cn	55652d434d39a	pink	0	4	0	4	0	2	0	0	0	0	0	5	3	5	2	3	0	0	0	0
cn	55652d434d39a	purple	4	0	0	3	1	4	0	0	0	0	0	4	0	2	0	3	0	2	0	0
cn	55652d434d39a	red	0	0	5	0	0	0	0	1	0	0	5	0	0	2	0	0	0	0	0	0
cn	55652d434d39a	turquoise	0	0	0	3	0	0	0	0	4	0	0	0	0	2	0	0	0	0	1	0
cn	55652d434d39a	white	0	1	0	0	0	0	0	0	0	0	0	0	0	0	0	0	0	0	0	0
cn	55652d434d39a	yellow	2	5	0	0	0	4	0	0	0	0	0	4	4	1	3	5	0	0	0	0
cn	55653152ae10c	black	0	0	0	0	0	0	5	0	0	0	0	0	0	0	0	0	0	0	0	0
cn	55653152ae10c	blue	0	0	0	0	0	0	0	0	0	0	0	0	0	0	0	0	0	0	2	0
cn	55653152ae10c	brown	0	0	0	0	0	0	0	4	0	0	0	0	0	0	0	0	0	0	0	0
cn	55653152ae10c	green	0	0	0	0	0	0	0	0	0	0	0	5	0	0	0	0	0	0	0	0
cn	55653152ae10c	grey	0	0	0	0	0	0	0	0	0	0	0	0	0	0	0	0	0	3	0	0
cn	55653152ae10c	orange	0	0	0	0	0	0	0	0	0	0	0	0	4	0	0	0	0	0	0	0
cn	55653152ae10c	pink	0	5	0	0	0	0	0	0	0	0	0	0	0	0	0	0	0	0	0	0
cn	55653152ae10c	purple	0	0	0	0	0	0	0	0	5	0	0	0	0	0	0	0	0	0	0	0
cn	55653152ae10c	red	0	0	0	0	0	0	0	0	0	0	0	0	0	5	0	0	0	0	0	0
cn	55653152ae10c	turquoise	0	0	0	0	0	0	0	0	0	0	0	4	0	0	0	0	0	0	0	0
cn	55653152ae10c	white	0	0	0	0	0	0	0	0	0	0	0	0	0	0	0	0	0	0	0	0
cn	55653152ae10c	yellow	0	0	0	0	0	4	0	0	0	0	0	0	0	0	0	0	0	0	0	0
cn	5565375b67aa2	black	0	0	0	0	0	0	0	4	4	0	5	0	0	0	0	0	0	0	0	0
cn	5565375b67aa2	blue	3	4	0	0	0	4	0	0	0	0	0	4	4	3	0	0	0	0	0	0
cn	5565375b67aa2	brown	0	0	0	0	0	0	0	0	0	0	0	0	0	0	0	0	0	0	0	0
cn	5565375b67aa2	green	0	3	0	0	0	0	0	0	0	0	0	2	1	0	5	0	0	0	0	0
cn	5565375b67aa2	grey	0	0	0	0	4	0	0	3	0	0	0	0	0	0	0	0	0	0	4	0
cn	5565375b67aa2	orange	0	0	0	0	0	3	0	0	0	0	0	0	5	2	0	0	0	0	0	0
cn	5565375b67aa2	pink	0	0	0	0	0	0	0	0	0	0	0	0	2	4	0	0	0	0	0	0
cn	5565375b67aa2	purple	0	0	0	0	0	0	0	0	0	0	0	4	0	0	0	0	0	0	0	0
cn	5565375b67aa2	red	0	0	0	0	0	5	0	0	0	0	0	0	0	5	0	0	0	0	0	0
cn	5565375b67aa2	turquoise	0	3	0	0	0	0	0	0	0	0	0	3	3	0	5	0	0	0	0	0
cn	5565375b67aa2	white	2	0	0	0	0	0	0	0	0	0	0	3	2	0	2	0	0	0	0	0
cn	5565375b67aa2	yellow	0	4	0	0	0	0	0	0	0	0	0	0	4	0	4	0	0	0	0	0
cn	5565395bb92b2	black	0	0	0	0	0	0	0	0	0	0	0	0	0	0	0	0	0	3	3	0
cn	5565395bb92b2	blue	0	0	0	3	0	3	0	0	0	0	0	0	0	0	0	0	0	0	0	0
cn	5565395bb92b2	brown	0	0	0	0	0	0	0	0	0	0	0	0	0	0	0	0	0	0	0	0
cn	5565395bb92b2	green	0	0	0	0	0	0	0	0	0	0	0	0	0	0	3	0	0	0	0	0
cn	5565395bb92b2	grey	0	0	0	0	0	3	0	0	0	0	0	0	0	0	0	0	0	0	0	0
cn	5565395bb92b2	orange	0	0	0	0	0	3	0	0	0	0	0	0	0	0	3	0	0	0	0	0
cn	5565395bb92b2	pink	0	0	0	0	0	0	0	0	0	0	0	3	0	0	3	0	0	0	0	0
cn	5565395bb92b2	purple	0	0	0	0	0	0	0	0	0	0	0	0	0	0	0	0	0	0	0	0
cn	5565395bb92b2	red	3	0	0	0	0	0	0	0	0	0	0	0	0	3	0	3	0	0	0	0
cn	5565395bb92b2	turquoise	0	0	0	0	0	0	0	0	0	0	0	0	0	0	3	0	0	0	0	0
cn	5565395bb92b2	white	0	0	0	0	0	0	0	0	0	0	0	0	0	0	0	0	0	0	0	0
cn	5565395bb92b2	yellow	0	3	0	0	0	0	0	0	0	0	0	0	3	0	0	0	0	0	0	0
cn	55653b9e7eb3d	black	0	0	1	0	0	0	0	0	0	0	0	0	0	0	0	0	0	0	0	0
cn	55653b9e7eb3d	blue	0	0	0	0	0	0	0	0	0	0	0	0	0	0	0	0	0	4	0	0
cn	55653b9e7eb3d	brown	0	0	0	0	0	3	0	0	0	0	0	0	0	0	0	0	0	0	0	0
cn	55653b9e7eb3d	green	0	0	0	0	0	0	0	0	0	0	0	0	0	0	4	0	0	0	0	0
cn	55653b9e7eb3d	grey	0	0	0	0	0	4	0	0	0	0	0	0	0	0	0	0	0	0	0	0
cn	55653b9e7eb3d	orange	0	0	0	0	0	0	0	0	0	0	0	4	0	0	0	0	0	0	0	0
cn	55653b9e7eb3d	pink	0	0	0	0	0	0	0	0	0	0	0	0	3	0	0	0	0	0	0	0
cn	55653b9e7eb3d	purple	0	0	0	0	0	0	0	0	0	0	0	0	0	0	0	3	0	0	0	0
cn	55653b9e7eb3d	red	0	0	0	0	0	0	0	0	0	0	0	0	0	5	0	0	0	0	0	0
cn	55653b9e7eb3d	turquoise	0	0	0	0	0	0	0	0	0	0	0	0	0	0	0	0	0	0	0	3
cn	55653b9e7eb3d	white	0	0	0	0	0	0	0	0	0	0	0	0	0	5	0	0	0	0	0	0
cn	55653b9e7eb3d	yellow	0	0	0	0	0	0	0	0	0	0	0	0	0	0	5	0	0	0	0	0
cn	55653e4ebe3b3	black	0	0	0	0	0	0	0	0	0	0	0	0	0	0	0	0	0	0	4	0
cn	55653e4ebe3b3	blue	0	0	0	0	0	0	0	0	4	0	0	0	0	0	0	0	0	0	3	0
cn	55653e4ebe3b3	brown	0	0	0	0	0	4	0	0	0	0	0	0	0	0	0	0	0	0	0	0
cn	55653e4ebe3b3	green	0	0	0	0	0	0	0	0	0	0	0	0	0	5	0	0	0	0	0	0
cn	55653e4ebe3b3	grey	0	0	0	0	0	0	0	0	0	0	0	0	0	0	0	0	0	5	0	0
cn	55653e4ebe3b3	orange	0	5	0	0	0	0	0	0	0	0	0	0	5	0	0	0	0	0	0	0
cn	55653e4ebe3b3	pink	0	0	0	0	0	0	0	0	0	0	0	0	0	0	5	0	0	0	0	0
cn	55653e4ebe3b3	purple	5	0	0	0	0	0	0	0	0	0	0	0	0	0	0	0	0	0	0	0
cn	55653e4ebe3b3	red	0	0	0	0	0	0	0	0	0	0	0	0	5	0	0	5	0	0	0	0
cn	55653e4ebe3b3	turquoise	0	0	0	0	0	0	0	0	0	0	0	5	0	0	0	0	0	0	0	0
cn	55653e4ebe3b3	white	5	0	0	0	0	5	0	0	0	0	0	0	0	0	0	0	0	0	0	0
cn	55653e4ebe3b3	yellow	5	5	0	0	0	0	0	0	0	0	0	0	5	0	5	0	0	0	0	0
cn	556542fc8cf0d	black	0	0	0	0	0	0	0	0	5	0	0	0	0	0	0	0	0	0	5	0
cn	556542fc8cf0d	blue	0	0	0	0	0	0	0	0	0	0	0	5	0	5	0	0	0	0	0	0
cn	556542fc8cf0d	brown	0	0	0	0	0	0	0	0	0	4	0	0	0	0	0	0	3	0	0	0
cn	556542fc8cf0d	green	0	0	0	0	0	0	0	0	0	0	0	0	0	0	0	0	0	5	0	0
cn	556542fc8cf0d	grey	0	0	0	0	0	0	4	0	0	0	0	0	0	0	0	0	0	0	5	0
cn	556542fc8cf0d	orange	0	0	0	0	0	5	0	0	0	0	0	0	5	0	0	0	0	0	0	0
cn	556542fc8cf0d	pink	0	0	0	0	0	0	0	0	0	0	0	0	0	5	0	0	0	0	0	0
cn	556542fc8cf0d	purple	0	0	0	0	0	0	0	0	0	0	0	0	0	0	5	0	0	0	0	0
cn	556542fc8cf0d	red	0	0	0	0	0	0	0	0	0	0	0	0	5	5	0	0	0	0	0	0
cn	556542fc8cf0d	turquoise	0	5	0	0	0	5	0	0	0	0	0	0	0	0	0	0	0	0	0	0
cn	556542fc8cf0d	white	5	0	0	5	0	0	0	0	0	0	0	0	0	0	0	0	0	0	0	0
cn	556542fc8cf0d	yellow	0	0	0	5	0	0	0	0	0	0	0	0	5	0	0	0	0	0	0	0
cn	556543126cb8d	black	0	0	0	0	0	0	0	0	0	0	0	0	0	0	0	0	0	0	4	0
cn	556543126cb8d	blue	0	0	0	0	0	0	0	0	0	0	0	0	3	0	0	0	0	0	0	0
cn	556543126cb8d	brown	0	0	3	0	0	0	0	0	0	0	0	0	0	0	0	0	0	0	0	0
cn	556543126cb8d	green	0	0	0	0	0	4	0	0	0	0	0	0	0	0	0	0	0	0	0	0
cn	556543126cb8d	grey	0	0	0	0	0	0	0	0	0	0	4	0	0	0	0	0	0	0	0	0
cn	556543126cb8d	orange	0	0	0	0	0	0	0	0	0	0	0	0	5	0	0	0	0	0	0	0
cn	556543126cb8d	pink	0	0	0	0	0	0	0	0	0	0	0	0	0	5	0	0	0	0	0	0
cn	556543126cb8d	purple	0	0	0	0	0	0	0	0	0	0	0	0	0	0	0	3	0	0	0	0
cn	556543126cb8d	red	0	0	0	0	0	0	0	0	0	0	0	0	0	5	0	0	0	0	0	0
cn	556543126cb8d	turquoise	0	0	0	0	0	0	0	0	0	0	0	0	0	0	0	0	0	2	0	0
cn	556543126cb8d	white	0	0	0	0	0	0	0	0	0	0	0	3	0	0	0	0	0	3	0	0
cn	556543126cb8d	yellow	0	0	0	0	0	0	0	0	0	0	0	0	0	0	3	0	0	0	0	0
cn	556548cca86ec	black	0	0	0	0	0	0	0	0	5	0	0	0	0	0	0	0	0	0	5	0
cn	556548cca86ec	blue	0	0	0	0	0	0	0	0	0	0	0	0	0	0	0	0	0	0	5	0
cn	556548cca86ec	brown	0	0	0	0	0	0	0	0	0	0	0	0	0	0	0	0	0	0	0	4
cn	556548cca86ec	green	0	0	0	0	0	0	0	0	0	0	0	0	0	0	4	0	0	3	0	0
cn	556548cca86ec	grey	0	0	0	0	0	0	4	0	0	3	0	0	0	0	0	0	0	0	3	3
cn	556548cca86ec	orange	0	5	0	0	0	0	0	0	0	0	0	0	3	0	0	0	0	0	0	0
cn	556548cca86ec	pink	0	4	0	0	0	0	0	0	0	0	0	4	3	4	3	0	0	0	0	0
cn	556548cca86ec	purple	0	0	0	0	0	4	0	0	0	0	0	0	0	0	0	5	0	0	0	0
cn	556548cca86ec	red	0	0	5	0	0	0	0	0	0	0	0	0	0	0	0	0	0	0	0	0
cn	556548cca86ec	turquoise	0	0	0	0	3	0	0	2	0	0	0	0	0	0	0	0	0	0	0	0
cn	556548cca86ec	white	0	0	0	0	0	0	0	0	0	0	0	0	0	0	0	0	0	0	0	0
cn	556548cca86ec	yellow	0	0	0	0	0	5	0	0	0	0	0	0	0	0	5	5	0	0	0	0
cn	55657ee4e3d4f	black	0	0	0	0	0	0	4	3	2	4	0	0	0	0	0	0	0	0	3	0
cn	55657ee4e3d4f	blue	0	0	0	0	0	0	0	0	0	0	0	0	0	0	0	0	0	0	0	0
cn	55657ee4e3d4f	brown	0	0	0	0	0	0	0	0	0	0	0	0	0	0	0	0	0	0	0	0
cn	55657ee4e3d4f	green	3	0	0	0	0	0	0	0	0	0	0	0	0	0	0	0	0	5	0	0
cn	55657ee4e3d4f	grey	0	0	0	0	4	0	3	0	0	0	0	0	0	0	0	0	1	0	1	1
cn	55657ee4e3d4f	orange	0	0	0	2	0	0	0	0	0	0	0	4	2	0	3	0	0	3	0	0
cn	55657ee4e3d4f	pink	0	4	0	0	3	0	0	0	0	0	0	0	4	0	0	0	0	0	0	0
cn	55657ee4e3d4f	purple	4	5	0	0	0	0	0	0	0	0	0	4	4	0	5	4	0	5	0	0
cn	55657ee4e3d4f	red	4	4	4	0	0	0	0	0	0	0	4	0	5	5	5	0	0	0	0	0
cn	55657ee4e3d4f	turquoise	4	0	0	0	0	0	0	0	0	0	0	4	3	0	0	0	0	5	0	0
cn	55657ee4e3d4f	white	0	0	0	0	5	0	0	0	0	0	0	0	0	0	0	0	0	0	0	0
cn	55657ee4e3d4f	yellow	3	0	0	0	0	0	0	0	0	0	0	4	0	0	0	0	0	4	0	0
cn	5565a3d689fe3	black	0	0	0	0	0	0	0	0	0	0	0	0	0	0	0	0	0	0	0	0
cn	5565a3d689fe3	blue	0	0	0	0	0	0	0	0	0	0	0	0	0	0	0	0	0	0	0	0
cn	5565a3d689fe3	brown	0	0	0	0	0	0	0	0	0	0	0	0	0	0	0	0	0	0	0	0
cn	5565a3d689fe3	green	0	0	0	0	0	0	0	0	0	0	0	0	0	5	0	0	0	0	0	0
cn	5565a3d689fe3	grey	0	0	0	0	1	0	0	0	0	0	0	0	0	0	0	0	0	0	0	0
cn	5565a3d689fe3	orange	0	0	0	0	0	0	0	0	0	0	0	0	5	0	0	0	0	0	0	0
cn	5565a3d689fe3	pink	0	0	0	0	0	0	0	0	0	0	0	0	0	0	3	0	0	0	0	0
cn	5565a3d689fe3	purple	0	0	0	0	0	0	0	0	0	0	0	0	0	0	0	0	0	0	0	0
cn	5565a3d689fe3	red	0	0	0	0	0	0	0	0	0	0	0	0	5	0	0	0	0	0	0	0
cn	5565a3d689fe3	turquoise	0	0	0	0	0	0	0	0	0	0	0	0	0	0	1	0	0	0	0	0
cn	5565a3d689fe3	white	0	0	0	0	0	0	0	0	0	0	0	0	0	0	0	0	0	0	0	0
cn	5565a3d689fe3	yellow	0	5	0	0	0	0	0	0	0	0	0	0	0	0	0	0	0	0	0	0
cn	5565ac2d5e2a7	black	0	0	0	4	0	0	0	0	0	0	0	0	0	0	0	0	0	3	0	0
cn	5565ac2d5e2a7	blue	0	0	0	4	0	0	0	0	0	0	0	0	0	0	0	0	0	3	0	0
cn	5565ac2d5e2a7	brown	0	0	0	0	0	0	0	0	0	0	0	0	0	0	0	0	0	3	0	0
cn	5565ac2d5e2a7	green	0	0	0	4	0	0	0	0	0	0	0	0	0	0	0	0	0	3	0	0
cn	5565ac2d5e2a7	grey	0	0	0	5	0	0	0	0	0	0	0	0	0	0	0	0	0	3	0	0
cn	5565ac2d5e2a7	orange	0	0	0	5	0	0	0	0	0	0	0	0	0	0	0	0	0	3	0	0
cn	5565ac2d5e2a7	pink	0	0	0	4	0	0	0	0	0	0	0	0	0	0	0	0	0	3	0	0
cn	5565ac2d5e2a7	purple	0	0	0	5	0	0	0	0	0	0	0	0	0	0	0	0	0	3	0	0
cn	5565ac2d5e2a7	red	0	0	0	5	0	0	0	0	0	0	0	0	0	0	0	0	0	3	0	0
cn	5565ac2d5e2a7	turquoise	0	0	0	4	0	0	0	0	0	0	0	0	0	0	0	0	0	3	0	0
cn	5565ac2d5e2a7	white	0	0	0	5	0	0	0	0	0	0	0	0	0	0	0	0	0	4	0	0
cn	5565ac2d5e2a7	yellow	0	0	0	4	0	0	0	0	0	0	0	0	0	0	0	0	0	3	0	0
cn	5565b277eb762	black	0	0	4	0	0	0	1	3	4	1	5	0	0	0	0	0	1	0	3	1
cn	5565b277eb762	blue	3	5	0	1	0	4	0	0	0	0	0	3	4	3	5	0	0	0	0	0
cn	5565b277eb762	brown	0	0	0	0	0	0	0	0	0	0	0	0	0	0	0	0	0	0	0	0
cn	5565b277eb762	green	3	5	0	0	0	3	0	0	0	0	0	0	4	0	5	3	0	0	0	0
cn	5565b277eb762	grey	0	0	0	0	0	0	1	3	4	3	3	0	0	0	0	0	3	0	5	1
cn	5565b277eb762	orange	0	3	0	0	0	0	0	0	0	0	0	4	3	0	3	2	0	0	0	0
cn	5565b277eb762	pink	3	4	0	2	0	0	0	0	0	0	0	0	4	5	4	0	0	0	1	0
cn	5565b277eb762	purple	0	0	0	0	1	0	0	0	0	0	0	0	0	0	0	1	0	0	0	0
cn	5565b277eb762	red	5	3	5	0	0	4	0	0	3	0	4	5	4	4	3	5	0	0	0	0
cn	5565b277eb762	turquoise	0	3	0	0	0	0	0	0	0	0	0	1	3	0	3	0	0	0	0	0
cn	5565b277eb762	white	0	0	0	0	0	0	0	0	0	0	0	0	0	0	0	0	0	0	0	0
cn	5565b277eb762	yellow	0	2	0	0	0	0	0	0	0	0	0	0	2	0	2	0	0	0	0	0
cn	5565b8fbf359a	black	0	0	0	0	0	0	0	5	5	0	0	0	0	0	0	0	0	0	0	0
cn	5565b8fbf359a	blue	0	0	0	0	0	0	0	0	0	4	0	0	0	0	0	0	5	0	0	0
cn	5565b8fbf359a	brown	0	0	0	0	0	0	0	0	0	0	0	0	0	0	0	0	0	0	0	5
cn	5565b8fbf359a	green	0	0	0	0	0	5	0	0	0	0	0	0	0	0	0	0	0	0	0	0
cn	5565b8fbf359a	grey	0	0	0	0	0	0	5	0	0	0	0	0	0	0	0	0	0	0	0	0
cn	5565b8fbf359a	orange	0	0	0	0	0	0	0	0	0	0	0	0	0	0	0	0	0	0	0	5
cn	5565b8fbf359a	pink	0	0	0	0	0	0	0	0	0	0	0	0	0	5	0	0	0	0	0	0
cn	5565b8fbf359a	purple	0	0	0	0	0	0	0	0	0	0	5	0	0	0	0	0	0	0	0	0
cn	5565b8fbf359a	red	0	0	5	0	0	0	0	0	0	0	0	0	0	0	0	0	0	0	0	0
cn	5565b8fbf359a	turquoise	0	0	0	0	0	0	0	0	0	0	0	0	0	0	5	0	0	0	0	0
cn	5565b8fbf359a	white	0	0	0	5	0	0	0	0	0	0	0	0	0	0	0	0	0	0	5	0
cn	5565b8fbf359a	yellow	5	0	0	0	0	0	0	0	0	0	0	0	0	0	0	0	0	0	0	0
cn	5565b923b477d	black	0	0	0	0	0	0	5	0	0	0	0	0	0	0	0	0	0	0	0	0
cn	5565b923b477d	blue	0	0	0	0	0	4	0	0	0	0	0	0	4	0	0	0	0	0	0	0
cn	5565b923b477d	brown	0	0	0	0	0	0	0	0	0	0	0	0	0	0	0	0	0	0	0	0
cn	5565b923b477d	green	0	4	0	0	0	0	0	0	0	0	0	5	0	0	0	0	0	4	0	0
cn	5565b923b477d	grey	0	0	0	0	0	0	5	0	0	0	0	0	0	0	0	0	3	0	0	0
cn	5565b923b477d	orange	0	4	0	0	0	4	0	0	0	0	0	0	0	4	4	0	0	0	0	0
cn	5565b923b477d	pink	0	0	0	0	0	0	0	0	0	0	0	0	0	5	4	0	0	0	0	0
cn	5565b923b477d	purple	0	0	0	0	0	4	0	0	0	0	0	0	4	0	0	0	0	0	0	0
cn	5565b923b477d	red	0	0	4	0	0	0	0	0	0	0	0	0	0	4	0	0	0	0	0	0
cn	5565b923b477d	turquoise	0	0	0	0	0	0	4	3	0	0	0	0	0	0	0	0	0	0	0	0
cn	5565b923b477d	white	0	0	0	0	0	0	0	0	0	0	0	0	0	0	0	0	0	0	0	0
cn	5565b923b477d	yellow	4	4	0	0	0	0	0	0	0	0	0	0	4	0	4	0	0	0	0	0
cn	5565ba5547748	black	0	0	0	0	0	0	0	5	5	0	5	0	0	0	0	0	0	0	0	0
cn	5565ba5547748	blue	0	0	0	5	0	0	0	0	0	0	0	0	0	0	0	0	0	0	0	0
cn	5565ba5547748	brown	0	0	0	0	0	0	0	0	0	5	0	0	0	0	0	0	0	0	0	0
cn	5565ba5547748	green	5	0	0	0	0	0	0	0	0	0	0	0	0	5	0	0	0	0	0	0
cn	5565ba5547748	grey	0	0	0	0	0	0	0	0	0	0	0	0	0	0	0	0	0	0	5	0
cn	5565ba5547748	orange	0	0	0	0	0	5	0	0	0	0	0	0	0	0	0	0	0	0	0	0
cn	5565ba5547748	pink	0	0	0	0	0	0	0	0	0	0	0	0	0	5	0	0	0	0	0	0
cn	5565ba5547748	purple	0	0	0	5	0	0	0	0	0	0	0	0	0	0	0	0	0	0	5	0
cn	5565ba5547748	red	0	0	0	0	0	5	0	0	0	0	0	0	5	5	0	0	0	0	0	0
cn	5565ba5547748	turquoise	0	0	0	0	0	0	0	0	0	0	0	5	0	0	0	0	0	0	0	0
cn	5565ba5547748	white	0	0	0	0	0	0	0	0	0	0	0	0	0	0	0	0	0	0	0	5
cn	5565ba5547748	yellow	0	0	0	0	0	5	0	0	0	0	0	0	0	0	0	0	0	0	0	0
cn	5565bd344652c	black	0	0	0	0	0	0	0	0	3	0	0	0	0	0	0	0	0	0	5	0
cn	5565bd344652c	blue	0	0	0	0	0	2	0	0	0	0	0	0	0	0	0	0	0	0	4	2
cn	5565bd344652c	brown	0	0	0	0	0	0	0	0	0	0	0	0	0	0	0	0	0	0	0	0
cn	5565bd344652c	green	0	4	2	0	0	0	0	0	0	0	2	0	4	0	4	0	0	3	0	1
cn	5565bd344652c	grey	0	0	0	3	0	0	5	0	0	4	0	0	0	0	0	0	4	0	4	4
cn	5565bd344652c	orange	0	3	0	0	0	0	0	0	0	0	0	0	3	0	3	0	0	0	0	0
cn	5565bd344652c	pink	0	5	0	0	0	0	0	0	0	0	0	0	0	4	0	0	0	0	0	0
cn	5565bd344652c	purple	0	0	0	0	0	4	0	0	0	0	0	2	4	0	4	0	0	0	0	0
cn	5565bd344652c	red	0	0	5	0	0	0	0	0	0	0	0	0	4	5	0	0	0	0	0	0
cn	5565bd344652c	turquoise	0	0	2	0	0	0	2	0	0	0	0	0	0	0	0	0	0	1	0	0
cn	5565bd344652c	white	0	0	0	0	0	0	0	0	3	0	0	0	4	0	0	0	0	5	0	0
cn	5565bd344652c	yellow	0	0	0	0	0	0	0	4	0	2	0	0	0	0	0	4	2	0	0	0
cn	5565bd754c4dc	black	1	1	5	1	3	1	4	4	5	4	4	1	1	1	1	1	3	1	5	3
cn	5565bd754c4dc	blue	2	4	3	1	1	2	1	1	1	1	2	4	3	1	3	3	1	4	1	1
cn	5565bd754c4dc	brown	2	2	2	1	2	2	2	2	2	2	3	2	2	1	2	1	2	2	2	2
cn	5565bd754c4dc	green	3	3	1	3	3	2	1	1	1	1	1	3	3	3	3	1	1	4	1	3
cn	5565bd754c4dc	grey	1	2	4	3	2	1	4	3	4	4	4	3	1	1	1	1	3	1	4	2
cn	5565bd754c4dc	orange	4	5	2	3	1	4	1	1	2	1	1	4	4	4	4	5	1	4	1	1
cn	5565bd754c4dc	pink	3	5	1	4	1	4	1	1	1	1	1	5	5	5	5	3	1	4	1	1
cn	5565bd754c4dc	purple	5	4	1	2	2	5	1	1	1	1	1	5	4	4	5	5	1	3	1	1
cn	5565bd754c4dc	red	5	5	1	1	1	4	1	3	5	1	1	4	5	4	5	5	1	1	1	1
cn	5565bd754c4dc	turquoise	4	5	1	3	1	4	1	1	1	1	2	4	5	4	5	3	1	5	1	1
cn	5565bd754c4dc	white	1	1	4	4	4	1	4	4	4	3	4	1	1	2	1	1	4	5	4	2
cn	5565bd754c4dc	yellow	4	3	1	3	1	3	1	3	1	1	1	3	3	2	3	4	1	2	1	1
cn	5565bd88348fe	black	0	0	3	5	3	0	2	4	3	2	3	0	0	0	0	0	3	1	5	2
cn	5565bd88348fe	blue	5	5	2	1	2	5	2	1	2	2	2	3	5	4	5	5	2	0	1	0
cn	5565bd88348fe	brown	1	3	0	1	2	3	1	2	0	0	0	2	3	2	2	4	1	1	1	0
cn	5565bd88348fe	green	5	4	0	1	0	5	0	0	0	1	0	4	5	5	5	4	2	0	2	1
cn	5565bd88348fe	grey	0	0	2	3	3	0	4	3	3	3	2	0	0	0	0	0	3	3	2	3
cn	5565bd88348fe	orange	0	0	0	3	0	0	2	0	0	0	0	0	0	0	0	4	0	3	3	3
cn	5565bd88348fe	pink	4	5	0	3	0	5	0	0	0	1	0	5	5	5	4	3	1	0	0	0
cn	5565bd88348fe	purple	0	4	0	1	1	0	3	1	2	0	2	4	0	0	0	3	0	0	2	0
cn	5565bd88348fe	red	5	5	3	2	2	5	1	3	2	2	3	5	5	5	5	5	2	1	1	4
cn	5565bd88348fe	turquoise	1	2	2	0	1	3	2	1	1	1	1	2	3	0	2	3	0	0	0	1
cn	5565bd88348fe	white	4	0	0	0	3	4	1	2	0	1	0	4	4	4	4	3	1	0	0	0
cn	5565bd88348fe	yellow	0	0	0	3	4	0	0	2	0	4	0	0	0	0	0	4	4	0	0	0
cn	5565c28f78a8c	black	0	0	0	0	0	0	0	0	5	0	0	0	0	0	0	0	0	0	4	0
cn	5565c28f78a8c	blue	0	0	0	0	0	0	0	0	0	0	0	0	0	0	0	0	0	3	0	0
cn	5565c28f78a8c	brown	0	0	0	0	0	0	0	3	0	0	0	0	0	0	0	0	0	0	0	0
cn	5565c28f78a8c	green	5	3	0	0	0	4	0	0	0	0	0	5	0	0	0	0	0	0	0	0
cn	5565c28f78a8c	grey	0	0	0	0	0	0	4	0	0	0	0	0	0	0	0	0	3	0	5	0
cn	5565c28f78a8c	orange	0	0	0	0	0	4	0	0	0	0	0	0	0	0	0	0	0	0	0	0
cn	5565c28f78a8c	pink	0	0	0	0	0	0	0	0	0	0	0	5	0	5	0	0	0	0	0	0
cn	5565c28f78a8c	purple	3	0	0	0	0	4	0	0	0	0	0	0	0	0	0	3	0	0	0	0
cn	5565c28f78a8c	red	0	5	0	0	0	0	0	0	0	0	0	0	4	4	0	0	0	0	0	0
cn	5565c28f78a8c	turquoise	0	4	0	0	0	0	0	0	0	0	0	0	0	0	0	0	0	2	0	0
cn	5565c28f78a8c	white	0	0	0	0	3	0	2	0	5	0	0	0	0	0	0	0	0	0	0	0
cn	5565c28f78a8c	yellow	0	0	5	0	0	0	0	0	0	0	0	0	3	0	0	0	0	0	0	0
cn	5565c391d64b6	black	0	0	0	0	0	0	0	0	0	5	0	0	0	0	0	0	5	0	0	0
cn	5565c391d64b6	blue	0	0	0	0	0	0	0	0	0	0	0	0	0	0	0	0	0	0	5	0
cn	5565c391d64b6	brown	0	0	0	0	0	0	0	5	0	0	3	0	0	0	0	0	0	0	0	0
cn	5565c391d64b6	green	0	0	0	0	0	0	0	0	0	0	0	0	5	0	5	0	0	0	0	0
cn	5565c391d64b6	grey	0	0	0	0	5	0	5	0	0	0	0	0	0	0	0	0	0	0	0	0
cn	5565c391d64b6	orange	0	5	0	0	0	5	0	0	0	0	0	0	0	0	0	0	0	0	0	0
cn	5565c391d64b6	pink	0	0	0	0	0	0	0	0	0	0	0	0	0	5	0	0	0	0	0	0
cn	5565c391d64b6	purple	0	0	0	0	0	0	0	0	0	0	0	5	0	0	0	0	0	0	0	0
cn	5565c391d64b6	red	5	0	0	0	0	0	0	0	0	0	0	0	0	0	0	5	0	0	0	0
cn	5565c391d64b6	turquoise	0	0	0	0	0	0	0	0	0	0	0	0	0	0	0	0	0	0	0	0
cn	5565c391d64b6	white	0	0	0	0	0	0	0	0	0	0	0	0	0	0	0	0	0	0	0	0
cn	5565c391d64b6	yellow	0	5	0	0	0	0	0	0	0	0	0	5	0	0	0	0	0	0	0	0
cn	5565c3ed844d3	black	0	0	0	0	0	0	0	0	5	0	5	0	0	0	0	0	5	0	0	0
cn	5565c3ed844d3	blue	0	0	0	0	0	0	0	0	0	0	0	0	0	0	0	0	0	0	4	4
cn	5565c3ed844d3	brown	0	0	0	0	0	0	0	0	0	3	0	0	0	0	0	0	0	0	5	0
cn	5565c3ed844d3	green	0	4	0	0	0	0	0	0	0	0	0	0	0	0	0	0	0	0	0	4
cn	5565c3ed844d3	grey	0	0	0	0	0	0	0	5	0	0	3	0	0	0	0	0	0	0	4	0
cn	5565c3ed844d3	orange	0	0	0	0	0	4	0	0	0	0	0	0	0	3	4	0	0	0	0	0
cn	5565c3ed844d3	pink	0	5	0	0	0	0	0	0	0	0	0	3	0	0	0	0	0	0	0	0
cn	5565c3ed844d3	purple	0	0	0	0	0	0	0	0	0	0	0	5	0	0	0	0	0	0	3	0
cn	5565c3ed844d3	red	0	0	0	0	0	0	0	0	0	0	0	5	5	5	0	0	0	0	0	0
cn	5565c3ed844d3	turquoise	0	0	0	0	0	0	0	0	0	0	0	0	5	0	3	0	0	0	0	0
cn	5565c3ed844d3	white	0	0	0	0	3	0	0	0	0	0	0	0	0	0	0	0	0	5	4	0
cn	5565c3ed844d3	yellow	0	0	0	4	0	5	0	0	0	0	0	0	0	0	0	5	0	0	0	0
cn	5565c6243a3fa	black	0	0	0	0	0	0	5	5	5	3	0	0	0	0	0	0	5	0	5	5
cn	5565c6243a3fa	blue	4	0	0	0	0	1	0	0	0	0	0	0	0	0	0	4	0	0	0	0
cn	5565c6243a3fa	brown	0	0	0	0	0	0	0	0	0	0	0	0	0	0	0	0	0	0	0	0
cn	5565c6243a3fa	green	0	0	0	0	0	4	0	0	0	0	0	0	4	4	0	0	0	0	0	0
cn	5565c6243a3fa	grey	0	0	0	0	0	0	4	0	0	0	0	0	0	0	0	0	3	0	3	3
cn	5565c6243a3fa	orange	0	4	0	0	0	0	0	0	0	0	0	0	4	0	4	0	0	0	0	0
cn	5565c6243a3fa	pink	0	4	0	0	0	0	0	0	0	0	0	0	4	4	0	0	0	0	0	0
cn	5565c6243a3fa	purple	0	0	0	0	0	3	0	0	0	0	0	0	3	0	0	0	0	0	0	0
cn	5565c6243a3fa	red	0	0	0	0	0	0	0	0	0	0	0	0	5	0	0	0	0	0	0	0
cn	5565c6243a3fa	turquoise	0	0	0	0	0	0	0	0	0	0	0	0	0	0	4	0	0	0	0	0
cn	5565c6243a3fa	white	0	0	0	2	0	0	0	0	0	0	0	0	0	0	0	0	0	0	0	0
cn	5565c6243a3fa	yellow	0	0	0	0	0	4	0	0	0	0	0	0	3	0	2	0	0	0	0	0
cn	5565c84e6fdde	black	0	0	0	0	0	0	5	0	5	0	5	0	0	0	0	0	0	0	0	0
cn	5565c84e6fdde	blue	0	0	0	0	0	4	4	0	0	0	0	0	0	0	0	0	0	0	4	0
cn	5565c84e6fdde	brown	0	0	0	0	0	3	0	0	0	0	0	0	0	0	0	0	0	0	0	0
cn	5565c84e6fdde	green	0	0	0	0	0	0	0	4	0	3	4	0	0	0	0	0	0	0	0	0
cn	5565c84e6fdde	grey	0	0	0	0	3	0	4	3	0	0	0	0	0	0	0	0	0	0	0	0
cn	5565c84e6fdde	orange	0	5	0	0	0	0	0	0	0	0	0	0	0	0	0	5	3	0	0	0
cn	5565c84e6fdde	pink	0	0	0	3	0	3	0	0	0	0	0	0	5	3	4	0	0	0	0	0
cn	5565c84e6fdde	purple	0	4	0	0	0	0	0	0	0	0	0	4	0	0	0	0	0	0	0	0
cn	5565c84e6fdde	red	0	0	5	0	0	0	0	0	0	0	3	0	4	5	0	0	0	0	0	0
cn	5565c84e6fdde	turquoise	0	0	0	0	0	0	0	0	0	0	0	0	0	0	4	0	0	0	0	0
cn	5565c84e6fdde	white	4	0	0	0	0	0	0	0	0	0	0	0	0	0	0	0	0	4	0	0
cn	5565c84e6fdde	yellow	0	3	0	0	4	0	0	4	4	0	0	0	0	0	0	0	0	0	0	0
cn	5565cafa77e86	black	0	0	5	0	0	0	0	0	5	0	4	0	0	0	0	0	0	0	4	0
cn	5565cafa77e86	blue	0	5	0	0	0	4	0	0	0	0	0	0	5	0	5	0	0	0	0	0
cn	5565cafa77e86	brown	0	0	0	0	0	0	0	0	0	0	0	0	0	0	0	0	0	0	0	0
cn	5565cafa77e86	green	0	5	0	0	0	0	0	0	0	0	0	0	5	0	5	0	0	0	0	0
cn	5565cafa77e86	grey	0	0	0	0	0	0	4	4	5	0	0	0	0	0	0	0	0	0	5	0
cn	5565cafa77e86	orange	0	5	0	0	0	0	0	0	0	0	0	0	5	0	5	0	0	0	0	0
cn	5565cafa77e86	pink	0	5	0	0	0	5	0	0	0	0	0	0	5	5	5	0	0	0	0	0
cn	5565cafa77e86	purple	0	0	0	0	0	0	0	0	0	0	0	0	0	5	0	0	0	0	0	0
cn	5565cafa77e86	red	0	5	0	0	0	0	0	0	0	0	0	0	5	0	5	0	0	0	0	0
cn	5565cafa77e86	turquoise	0	5	0	0	0	0	0	0	0	0	0	0	5	0	5	0	0	0	0	0
cn	5565cafa77e86	white	0	0	0	0	0	0	0	0	0	5	0	0	0	0	0	0	5	0	5	4
cn	5565cafa77e86	yellow	0	0	0	0	0	0	0	0	0	0	0	0	0	0	0	0	0	0	0	0
cn	5565ccfc27442	black	0	0	1	2	0	0	3	2	2	3	1	4	0	0	0	0	3	4	3	2
cn	5565ccfc27442	blue	4	4	0	0	0	4	0	0	0	0	0	4	4	4	4	0	0	0	0	0
cn	5565ccfc27442	brown	0	2	0	0	0	0	0	0	0	0	0	0	0	0	2	1	0	0	0	0
cn	5565ccfc27442	green	3	0	0	0	0	2	0	0	0	0	0	2	3	0	3	0	0	0	0	0
cn	5565ccfc27442	grey	0	0	0	0	0	0	1	2	0	0	0	2	0	0	0	0	0	0	1	0
cn	5565ccfc27442	orange	2	1	0	0	0	2	0	0	0	0	0	1	2	2	2	0	0	0	0	0
cn	5565ccfc27442	pink	0	3	0	0	0	0	0	0	0	0	0	2	0	4	3	0	0	0	0	0
cn	5565ccfc27442	purple	2	1	0	2	0	2	0	0	0	0	0	0	1	2	1	0	0	0	0	0
cn	5565ccfc27442	red	3	3	1	1	0	3	0	0	0	0	0	3	3	2	3	3	0	0	0	1
cn	5565ccfc27442	turquoise	0	0	0	0	0	1	0	0	0	0	0	3	0	4	4	0	0	0	0	0
cn	5565ccfc27442	white	0	0	0	0	0	0	2	0	0	3	0	0	0	1	0	0	3	0	0	0
cn	5565ccfc27442	yellow	2	3	0	0	0	2	0	0	0	0	0	2	2	1	2	0	0	0	0	0
cn	5565d3abba825	black	0	0	0	0	0	0	0	0	5	0	0	0	0	0	0	0	0	0	5	0
cn	5565d3abba825	blue	0	0	0	0	0	4	0	0	0	0	0	3	0	0	0	0	0	0	0	3
cn	5565d3abba825	brown	0	0	0	1	0	0	0	0	0	0	0	0	0	1	0	0	0	1	0	0
cn	5565d3abba825	green	0	3	0	0	0	0	0	0	0	0	0	0	0	0	0	0	0	4	0	0
cn	5565d3abba825	grey	0	0	3	3	0	0	0	0	0	0	0	0	0	0	0	0	0	0	3	0
cn	5565d3abba825	orange	0	5	0	0	0	0	0	0	0	0	0	3	4	4	4	0	0	0	0	0
cn	5565d3abba825	pink	0	4	0	0	0	4	0	0	0	0	0	5	2	5	0	0	0	0	0	0
cn	5565d3abba825	purple	3	0	0	3	0	0	0	0	0	0	0	0	0	0	0	0	0	0	0	0
cn	5565d3abba825	red	5	5	0	0	0	0	0	0	0	0	0	0	5	0	3	3	0	0	0	0
cn	5565d3abba825	turquoise	0	0	0	0	0	0	0	0	0	0	0	0	0	0	0	0	3	0	0	2
cn	5565d3abba825	white	0	0	0	0	0	0	0	0	2	0	0	0	0	0	0	0	0	0	0	0
cn	5565d3abba825	yellow	3	2	0	0	0	0	0	0	0	0	0	0	0	0	0	4	0	0	0	0
cn	55666d1ea63d5	black	0	0	0	0	0	0	0	0	0	0	0	0	0	0	0	0	0	0	0	0
cn	55666d1ea63d5	blue	0	0	0	0	0	0	3	0	0	0	0	0	0	0	0	0	0	0	0	0
cn	55666d1ea63d5	brown	0	0	0	0	0	0	2	3	0	0	0	0	0	0	0	0	0	0	0	2
cn	55666d1ea63d5	green	0	4	0	0	0	0	0	0	0	0	0	0	3	0	4	0	0	0	0	0
cn	55666d1ea63d5	grey	0	0	0	0	0	0	5	0	0	0	0	0	0	0	0	0	4	0	5	0
cn	55666d1ea63d5	orange	0	0	0	0	0	0	0	0	0	0	0	0	0	0	0	3	0	3	0	0
cn	55666d1ea63d5	pink	0	4	0	0	0	4	0	0	0	0	0	5	0	5	0	0	0	0	0	0
cn	55666d1ea63d5	purple	0	0	0	0	0	0	0	0	0	0	0	0	0	4	0	0	3	0	0	0
cn	55666d1ea63d5	red	0	0	5	0	0	0	0	0	0	0	0	0	0	5	0	0	0	0	0	0
cn	55666d1ea63d5	turquoise	0	0	0	0	2	0	0	0	0	2	0	0	0	0	0	0	0	0	0	2
cn	55666d1ea63d5	white	0	0	0	0	0	0	0	0	0	0	0	0	0	0	0	0	0	0	0	0
cn	55666d1ea63d5	yellow	0	0	3	0	0	0	0	0	0	0	0	0	0	0	0	0	0	0	3	0
cn	55668cc9d7a25	black	0	0	0	0	0	0	0	5	5	0	5	0	0	0	0	0	0	0	5	0
cn	55668cc9d7a25	blue	0	0	0	0	0	0	0	0	0	0	0	0	5	0	5	0	0	0	0	0
cn	55668cc9d7a25	brown	0	0	0	0	0	0	0	0	0	0	0	0	0	0	0	5	0	0	0	0
cn	55668cc9d7a25	green	5	4	0	0	0	5	0	0	0	0	0	5	5	3	4	5	0	0	0	0
cn	55668cc9d7a25	grey	0	0	0	5	0	5	0	0	0	0	0	0	0	0	0	0	0	0	0	0
cn	55668cc9d7a25	orange	0	0	0	0	0	5	0	0	0	0	0	0	0	0	5	5	0	0	0	0
cn	55668cc9d7a25	pink	0	0	0	0	0	0	0	0	0	0	0	0	5	5	0	0	0	0	0	0
cn	55668cc9d7a25	purple	0	5	0	0	0	0	0	0	0	0	0	5	0	0	5	0	0	0	0	0
cn	55668cc9d7a25	red	0	0	0	0	0	0	0	0	0	0	0	5	0	0	0	5	0	0	0	0
cn	55668cc9d7a25	turquoise	0	0	0	0	0	5	0	0	0	0	0	5	0	0	0	0	0	0	0	0
cn	55668cc9d7a25	white	0	0	0	0	0	0	2	0	1	0	0	0	0	5	0	0	0	0	3	0
cn	55668cc9d7a25	yellow	5	0	0	0	0	5	0	0	0	0	0	0	0	0	5	0	0	0	0	0
cn	5566994aa9513	black	0	0	0	0	0	0	5	0	5	0	0	0	0	0	0	0	4	0	4	0
cn	5566994aa9513	blue	0	0	0	5	0	0	0	0	3	4	0	0	0	0	0	0	0	0	5	0
cn	5566994aa9513	brown	0	0	0	5	0	0	0	0	0	0	0	5	0	0	0	0	0	0	0	0
cn	5566994aa9513	green	0	5	0	5	0	5	0	0	0	0	0	0	0	0	0	0	0	0	0	0
cn	5566994aa9513	grey	0	0	0	0	0	0	5	0	0	5	0	0	0	0	0	0	5	0	5	0
cn	5566994aa9513	orange	5	5	0	0	0	5	0	0	0	0	0	0	5	5	5	5	0	0	0	0
cn	5566994aa9513	pink	5	5	0	0	0	5	0	0	0	0	0	0	5	5	5	0	0	0	0	0
cn	5566994aa9513	purple	0	0	0	0	0	0	0	0	2	0	0	0	0	0	0	0	0	0	0	0
cn	5566994aa9513	red	5	5	0	0	0	5	0	0	0	0	0	0	5	5	5	5	0	0	0	0
cn	5566994aa9513	turquoise	0	0	5	0	0	0	4	4	3	0	4	0	0	0	0	0	5	0	0	0
cn	5566994aa9513	white	0	0	0	0	2	0	5	0	0	0	0	0	0	0	0	0	0	0	3	0
cn	5566994aa9513	yellow	5	5	0	0	0	5	0	0	0	0	0	0	5	5	5	5	0	0	0	0
cn	55669dbfe15e1	black	0	0	0	0	0	0	3	0	3	4	0	0	0	0	0	0	0	0	3	0
cn	55669dbfe15e1	blue	0	0	0	3	2	4	2	0	3	2	0	0	0	0	0	4	3	4	3	0
cn	55669dbfe15e1	brown	0	0	3	0	0	0	0	0	0	0	3	0	0	0	0	0	0	0	0	0
cn	55669dbfe15e1	green	3	0	0	3	3	3	0	0	0	0	0	0	0	0	0	3	0	0	0	0
cn	55669dbfe15e1	grey	0	0	0	0	2	0	5	0	0	2	0	0	0	0	0	0	0	0	0	0
cn	55669dbfe15e1	orange	0	0	0	0	0	0	0	0	0	0	0	0	4	0	4	0	0	0	0	0
cn	55669dbfe15e1	pink	2	2	0	3	0	0	0	3	0	0	0	2	3	4	3	2	0	0	0	0
cn	55669dbfe15e1	purple	0	0	0	2	0	0	4	3	3	0	4	0	0	0	0	0	3	0	0	3
cn	55669dbfe15e1	red	0	5	5	0	0	3	0	0	3	0	0	5	3	3	3	0	0	0	0	0
cn	55669dbfe15e1	turquoise	0	0	0	0	0	0	0	4	0	0	0	0	0	0	0	0	0	0	0	0
cn	55669dbfe15e1	white	0	0	0	0	0	0	0	0	0	3	0	0	0	0	0	0	3	0	3	0
cn	55669dbfe15e1	yellow	3	0	3	0	0	3	0	0	0	0	0	3	3	0	0	0	0	0	0	0
cn	55669ed79c91e	black	0	0	5	0	0	0	5	5	5	4	5	0	0	0	0	0	0	0	0	3
cn	55669ed79c91e	blue	0	0	0	5	0	0	0	0	0	3	0	0	0	0	0	0	3	3	5	4
cn	55669ed79c91e	brown	0	0	0	0	0	0	3	4	3	0	0	0	0	0	0	0	0	0	0	0
cn	55669ed79c91e	green	0	0	0	0	0	0	0	0	0	0	0	0	0	0	0	0	0	0	0	0
cn	55669ed79c91e	grey	0	0	0	0	0	5	5	0	0	0	0	0	0	0	0	0	0	5	5	0
cn	55669ed79c91e	orange	5	5	0	0	3	0	0	0	0	0	0	3	5	0	5	0	3	0	0	0
cn	55669ed79c91e	pink	0	5	0	5	0	0	0	0	0	0	0	0	0	5	5	0	0	0	0	5
cn	55669ed79c91e	purple	0	0	0	4	0	0	4	0	0	4	0	3	0	5	0	0	4	0	4	4
cn	55669ed79c91e	red	5	0	5	0	0	0	0	0	5	0	3	0	5	5	0	0	0	0	0	5
cn	55669ed79c91e	turquoise	0	0	0	0	3	0	5	3	4	4	0	0	0	0	0	0	0	0	4	0
cn	55669ed79c91e	white	0	5	0	0	0	0	0	0	0	0	0	0	0	0	0	0	0	0	0	0
cn	55669ed79c91e	yellow	0	0	4	0	0	0	0	3	2	0	5	0	0	0	0	0	0	0	0	0
cn	5566a28ee42bf	black	0	0	0	0	0	0	0	0	5	0	0	0	0	0	0	0	0	0	0	0
cn	5566a28ee42bf	blue	0	0	0	0	0	0	0	0	0	0	0	0	0	0	0	0	0	0	4	0
cn	5566a28ee42bf	brown	0	0	0	0	0	0	0	0	0	0	0	0	0	0	0	0	0	0	0	0
cn	5566a28ee42bf	green	0	0	0	0	0	0	0	0	0	0	0	0	5	0	0	0	0	0	0	0
cn	5566a28ee42bf	grey	0	0	0	0	0	0	5	0	0	0	0	0	0	0	0	0	0	0	0	0
cn	5566a28ee42bf	orange	5	0	0	0	0	0	0	0	0	0	0	0	0	0	5	0	0	0	0	0
cn	5566a28ee42bf	pink	0	0	0	0	0	0	0	0	0	0	0	0	0	0	5	0	0	0	0	0
cn	5566a28ee42bf	purple	5	0	0	0	0	0	0	0	0	0	0	0	0	0	0	0	0	0	0	0
cn	5566a28ee42bf	red	0	0	0	0	0	0	0	0	0	0	0	0	0	5	0	0	0	0	0	0
cn	5566a28ee42bf	turquoise	0	0	0	0	0	0	0	0	0	0	0	0	0	0	0	0	0	5	0	0
cn	5566a28ee42bf	white	0	0	0	0	0	0	0	0	5	0	0	0	0	0	0	0	0	0	0	0
cn	5566a28ee42bf	yellow	0	5	0	0	0	0	0	0	0	0	0	0	5	0	5	5	0	0	0	0
cn	5566a4de335b0	black	0	0	0	0	0	0	0	4	5	0	0	0	0	0	0	0	0	0	5	0
cn	5566a4de335b0	blue	0	0	0	5	0	0	0	0	0	0	0	0	5	0	5	0	0	5	0	0
cn	5566a4de335b0	brown	0	0	0	0	0	0	4	0	0	0	0	0	0	0	0	0	2	0	3	0
cn	5566a4de335b0	green	4	1	0	0	0	0	0	0	0	0	0	3	0	0	0	0	0	5	0	0
cn	5566a4de335b0	grey	0	0	0	0	0	0	5	0	0	4	0	0	0	0	0	0	0	0	5	0
cn	5566a4de335b0	orange	0	0	2	0	0	0	0	0	0	0	0	0	0	0	0	0	0	0	0	0
cn	5566a4de335b0	pink	0	0	0	0	4	0	0	0	0	0	0	0	0	5	0	0	0	0	0	0
cn	5566a4de335b0	purple	0	0	3	0	0	0	3	5	0	0	0	0	0	0	0	0	0	0	0	0
cn	5566a4de335b0	red	0	0	0	0	0	0	0	0	0	0	0	0	0	4	0	4	0	0	0	0
cn	5566a4de335b0	turquoise	0	0	0	0	0	0	0	0	0	0	0	0	3	0	4	0	0	3	0	0
cn	5566a4de335b0	white	0	0	0	0	0	5	0	0	0	0	0	0	0	0	0	0	3	0	0	0
cn	5566a4de335b0	yellow	0	0	4	0	4	0	0	0	4	0	0	0	0	0	0	0	0	0	0	0
cn	5566a9fc38784	black	0	0	0	0	0	0	0	3	4	0	3	0	0	0	0	0	0	0	5	0
cn	5566a9fc38784	blue	0	0	0	0	0	3	0	0	0	0	0	0	0	0	0	0	0	0	0	0
cn	5566a9fc38784	brown	0	0	0	0	0	0	0	0	1	0	0	0	0	0	0	0	0	0	0	0
cn	5566a9fc38784	green	0	4	0	0	0	3	0	0	0	0	0	0	1	0	0	0	0	0	0	0
cn	5566a9fc38784	grey	0	0	0	0	0	0	0	0	2	3	2	0	0	0	0	0	0	0	0	0
cn	5566a9fc38784	orange	0	0	0	0	0	0	0	0	0	0	0	4	0	2	0	3	0	0	0	0
cn	5566a9fc38784	pink	0	4	0	0	0	0	0	0	0	0	0	2	4	4	4	0	0	0	0	0
cn	5566a9fc38784	purple	0	3	0	0	0	4	0	0	0	0	0	0	0	5	4	0	0	0	0	0
cn	5566a9fc38784	red	3	4	4	0	0	2	0	0	0	0	0	4	5	4	3	0	0	0	0	0
cn	5566a9fc38784	turquoise	0	2	0	0	0	0	0	0	0	0	0	0	0	0	0	0	0	2	0	0
cn	5566a9fc38784	white	0	0	0	0	0	0	0	0	2	0	0	0	0	0	0	0	0	0	4	0
cn	5566a9fc38784	yellow	0	0	0	0	0	0	0	0	0	2	0	3	0	0	2	0	0	0	0	0
cn	5566ab8d0e5bd	black	0	0	0	0	0	0	0	0	0	0	0	0	0	0	0	0	0	0	0	0
cn	5566ab8d0e5bd	blue	0	0	0	0	0	0	0	0	0	0	0	0	0	0	0	5	0	0	0	0
cn	5566ab8d0e5bd	brown	0	0	0	0	0	0	0	0	0	0	0	0	0	4	0	0	0	0	0	0
cn	5566ab8d0e5bd	green	0	0	0	0	0	0	5	0	0	0	0	0	0	0	0	0	0	0	0	0
cn	5566ab8d0e5bd	grey	0	0	0	0	0	0	0	0	0	0	0	0	0	0	0	0	5	0	0	0
cn	5566ab8d0e5bd	orange	0	0	0	0	0	4	0	0	0	0	0	0	0	0	0	0	0	0	0	0
cn	5566ab8d0e5bd	pink	0	0	0	0	0	0	0	0	0	0	0	0	0	0	0	0	0	0	0	0
cn	5566ab8d0e5bd	purple	0	0	0	0	0	0	0	0	0	0	0	0	0	5	0	0	0	0	0	0
cn	5566ab8d0e5bd	red	0	0	4	0	0	0	0	0	0	0	0	0	0	0	0	0	0	0	0	0
cn	5566ab8d0e5bd	turquoise	0	0	0	0	0	0	0	0	0	0	0	0	0	0	0	0	0	0	0	5
cn	5566ab8d0e5bd	white	0	0	0	0	0	0	0	0	0	0	0	0	0	0	0	0	0	0	0	0
cn	5566ab8d0e5bd	yellow	0	2	0	0	0	0	0	0	0	0	0	0	0	0	0	0	0	0	0	0
cn	5566b1a68c3d1	black	0	0	0	0	0	0	5	5	5	0	0	0	0	0	0	0	5	0	0	0
cn	5566b1a68c3d1	blue	0	0	0	5	0	0	0	0	0	0	0	0	0	0	0	0	0	4	4	0
cn	5566b1a68c3d1	brown	0	0	0	0	0	0	3	0	0	4	0	0	0	0	0	0	0	0	3	0
cn	5566b1a68c3d1	green	0	0	0	3	0	0	0	0	0	0	0	0	0	0	3	0	0	0	0	0
cn	5566b1a68c3d1	grey	0	0	0	0	0	0	0	0	0	0	0	0	0	0	0	0	0	0	5	0
cn	5566b1a68c3d1	orange	0	5	0	0	0	0	0	0	0	0	0	4	5	0	4	0	0	0	0	0
cn	5566b1a68c3d1	pink	0	0	0	0	0	0	0	0	0	0	0	0	0	5	0	0	0	0	0	0
cn	5566b1a68c3d1	purple	0	0	0	0	5	0	0	0	4	0	0	0	0	0	0	0	0	0	0	0
cn	5566b1a68c3d1	red	5	5	0	3	0	5	0	0	0	0	0	5	5	5	5	0	0	0	0	0
cn	5566b1a68c3d1	turquoise	0	0	0	0	0	0	0	0	0	0	0	5	0	0	5	0	0	3	0	0
cn	5566b1a68c3d1	white	0	0	0	0	0	0	0	0	0	0	0	0	0	0	0	0	0	5	0	0
cn	5566b1a68c3d1	yellow	0	5	0	0	0	0	0	0	0	0	0	0	5	0	0	0	0	0	0	0
cn	5566b2df989e6	black	0	0	0	0	0	0	0	0	0	0	0	0	0	0	0	0	0	0	3	0
cn	5566b2df989e6	blue	0	5	0	0	0	0	0	0	0	0	0	0	0	0	0	0	0	0	0	0
cn	5566b2df989e6	brown	0	0	0	0	0	0	0	0	0	0	0	0	0	0	0	0	0	0	0	0
cn	5566b2df989e6	green	3	0	0	0	0	0	0	0	0	0	0	0	0	0	0	0	0	0	0	0
cn	5566b2df989e6	grey	0	0	0	0	0	0	4	0	0	0	0	0	0	0	0	0	0	0	0	0
cn	5566b2df989e6	orange	0	0	0	0	0	0	0	0	0	0	0	0	0	0	5	0	0	0	0	0
cn	5566b2df989e6	pink	0	5	0	0	0	0	0	0	0	0	0	0	0	0	5	0	0	0	0	0
cn	5566b2df989e6	purple	0	0	0	0	0	0	0	0	0	0	0	0	0	0	0	0	0	0	2	0
cn	5566b2df989e6	red	0	0	0	0	0	0	0	0	0	0	0	0	0	5	0	0	0	0	0	0
cn	5566b2df989e6	turquoise	0	0	0	0	0	0	0	2	0	0	0	0	0	0	0	0	0	0	0	0
cn	5566b2df989e6	white	0	0	0	0	0	0	0	0	0	0	0	0	0	0	0	0	0	5	0	0
cn	5566b2df989e6	yellow	0	0	0	0	0	0	0	0	0	0	0	0	4	0	0	0	0	0	0	0
cn	5566b80670e57	black	0	0	0	0	0	0	0	0	5	0	0	0	0	0	0	0	0	0	5	0
cn	5566b80670e57	blue	0	5	0	0	0	0	0	0	0	0	0	0	5	0	5	0	0	0	0	0
cn	5566b80670e57	brown	0	0	0	0	4	0	0	3	0	0	0	0	0	0	0	0	0	0	0	0
cn	5566b80670e57	green	0	0	0	0	0	0	0	0	0	0	0	0	0	0	0	0	0	0	0	0
cn	5566b80670e57	grey	0	0	0	0	0	0	5	0	0	0	0	0	0	0	0	0	0	0	5	0
cn	5566b80670e57	orange	5	0	0	3	0	0	0	0	0	0	0	0	0	0	0	0	0	0	0	0
cn	5566b80670e57	pink	0	0	0	0	0	0	0	0	0	4	0	0	0	0	0	0	0	0	0	5
cn	5566b80670e57	purple	0	0	0	0	0	0	0	0	0	0	0	5	0	0	0	0	0	0	0	0
cn	5566b80670e57	red	0	0	4	0	0	0	0	0	0	0	0	0	0	5	0	0	0	0	0	2
cn	5566b80670e57	turquoise	0	0	0	0	0	0	0	4	0	3	0	0	0	0	0	0	2	0	0	0
cn	5566b80670e57	white	0	0	0	0	5	0	0	0	0	0	0	0	0	0	0	0	0	0	3	0
cn	5566b80670e57	yellow	0	3	0	0	0	0	0	0	0	0	0	0	3	0	3	0	0	0	0	0
cn	5566b824430b6	black	0	0	3	0	0	0	5	3	5	3	3	0	0	0	0	0	3	0	3	0
cn	5566b824430b6	blue	0	0	0	0	5	0	5	5	5	0	5	0	0	0	0	0	0	0	0	0
cn	5566b824430b6	brown	0	0	0	4	0	0	0	0	0	3	0	0	0	0	0	0	3	5	0	0
cn	5566b824430b6	green	0	5	0	0	0	5	0	0	0	0	0	5	5	0	5	5	0	0	0	0
cn	5566b824430b6	grey	0	0	0	0	4	0	4	0	0	5	0	0	0	0	0	0	4	0	4	0
cn	5566b824430b6	orange	0	5	0	0	0	0	0	0	0	0	0	0	0	0	0	5	0	0	0	0
cn	5566b824430b6	pink	0	4	0	0	0	4	0	0	0	0	0	0	4	5	4	0	0	3	0	5
cn	5566b824430b6	purple	5	0	0	0	0	0	0	0	0	0	0	5	0	5	0	0	0	0	0	5
cn	5566b824430b6	red	0	0	5	0	0	0	0	0	0	0	5	5	5	0	0	0	0	0	0	0
cn	5566b824430b6	turquoise	0	0	0	0	0	0	0	0	0	0	0	0	0	0	0	0	0	0	3	0
cn	5566b824430b6	white	0	0	0	0	0	0	0	0	0	0	0	0	0	0	0	0	0	5	0	0
cn	5566b824430b6	yellow	0	5	5	0	0	0	0	0	0	0	0	0	5	0	0	5	0	0	0	0
cn	5566b82a27819	black	0	0	3	0	0	0	3	4	5	0	5	0	0	0	0	0	0	0	5	4
cn	5566b82a27819	blue	0	0	0	4	0	0	0	0	3	0	0	0	0	0	4	0	0	3	5	0
cn	5566b82a27819	brown	0	4	0	0	0	5	0	0	0	2	0	0	0	0	4	0	3	0	0	0
cn	5566b82a27819	green	0	0	0	0	0	0	0	0	0	0	0	0	0	0	4	0	0	0	0	0
cn	5566b82a27819	grey	0	0	0	0	4	0	5	3	0	5	0	0	0	0	0	0	5	0	4	0
cn	5566b82a27819	orange	0	4	0	0	0	4	0	0	0	0	0	3	5	0	0	5	0	0	0	0
cn	5566b82a27819	pink	0	4	0	0	0	5	0	0	0	0	0	0	3	5	4	0	0	0	0	0
cn	5566b82a27819	purple	0	3	0	0	0	0	0	0	0	0	0	4	0	4	0	0	0	0	3	0
cn	5566b82a27819	red	0	0	5	0	0	0	0	0	0	0	4	0	5	5	0	5	0	0	0	0
cn	5566b82a27819	turquoise	0	0	4	3	0	0	0	1	0	0	0	0	0	0	0	0	2	0	2	0
cn	5566b82a27819	white	5	0	0	0	0	0	0	0	3	0	0	0	0	5	3	0	2	0	3	1
cn	5566b82a27819	yellow	0	5	0	0	0	0	0	0	0	0	0	0	5	0	4	0	0	0	0	0
cn	5566c689f0a2b	black	0	0	0	0	0	0	0	0	5	0	0	0	0	0	0	0	0	0	0	0
cn	5566c689f0a2b	blue	0	0	0	0	0	3	0	0	0	0	0	0	0	0	0	0	0	0	0	0
cn	5566c689f0a2b	brown	0	0	0	0	0	0	0	3	0	0	0	0	0	0	0	0	0	0	0	0
cn	5566c689f0a2b	green	0	4	0	0	0	0	0	0	0	0	0	0	0	0	0	0	0	0	0	0
cn	5566c689f0a2b	grey	0	0	0	0	4	0	0	0	0	0	0	0	0	0	0	0	0	0	0	0
cn	5566c689f0a2b	orange	0	0	0	0	0	0	0	0	0	0	0	0	5	0	0	0	0	0	0	0
cn	5566c689f0a2b	pink	0	0	0	0	0	0	0	0	0	0	0	0	0	5	0	0	0	0	0	0
cn	5566c689f0a2b	purple	0	0	0	0	0	0	0	0	0	0	0	0	0	0	0	0	4	0	0	0
cn	5566c689f0a2b	red	0	0	0	0	0	0	0	0	0	0	0	5	0	0	0	0	0	0	0	0
cn	5566c689f0a2b	turquoise	0	0	0	0	0	0	0	0	0	0	0	0	0	0	0	0	0	0	0	0
cn	5566c689f0a2b	white	0	0	0	0	4	0	0	0	0	0	0	0	0	0	0	0	0	0	0	0
cn	5566c689f0a2b	yellow	0	0	0	0	0	0	0	0	0	0	0	0	0	0	5	0	0	0	0	0
cn	5566c90e12f47	black	0	0	0	0	0	0	0	0	4	0	0	0	0	0	0	0	0	0	5	0
cn	5566c90e12f47	blue	0	0	0	4	0	0	0	0	0	0	0	0	0	0	0	0	0	3	0	0
cn	5566c90e12f47	brown	0	0	0	0	0	0	0	0	0	0	0	0	0	0	0	0	0	0	0	0
cn	5566c90e12f47	green	0	3	0	0	0	0	0	0	0	0	0	0	0	0	0	0	0	0	0	0
cn	5566c90e12f47	grey	0	0	0	0	0	0	4	0	0	4	0	0	0	0	0	0	3	0	0	0
cn	5566c90e12f47	orange	0	0	0	0	0	0	0	0	0	0	0	0	4	0	5	0	0	0	0	0
cn	5566c90e12f47	pink	0	4	0	0	0	3	0	0	0	0	0	0	0	4	3	0	0	0	0	0
cn	5566c90e12f47	purple	0	0	3	0	0	0	2	2	0	0	0	0	0	0	0	0	0	0	0	0
cn	5566c90e12f47	red	0	0	5	0	0	0	0	0	0	0	4	0	0	0	0	0	0	0	0	0
cn	5566c90e12f47	turquoise	0	0	0	0	3	0	0	0	2	0	4	0	0	0	0	0	0	0	0	0
cn	5566c90e12f47	white	4	0	0	0	0	0	0	0	0	0	0	0	0	0	0	0	0	3	0	0
cn	5566c90e12f47	yellow	0	0	0	0	0	2	0	0	0	0	0	0	3	0	4	0	0	0	0	0
cn	5566cbd03c845	black	0	0	5	0	5	0	5	5	5	0	5	0	0	0	0	0	4	0	5	3
cn	5566cbd03c845	blue	5	0	0	4	0	4	0	0	0	0	0	5	0	0	0	0	0	0	5	3
cn	5566cbd03c845	brown	0	0	0	0	3	0	3	4	2	0	3	0	0	0	0	0	0	0	0	2
cn	5566cbd03c845	green	0	3	0	5	0	0	0	0	0	4	3	5	0	0	3	0	0	0	4	3
cn	5566cbd03c845	grey	0	0	4	0	5	0	4	5	3	5	0	0	0	0	0	0	5	0	2	5
cn	5566cbd03c845	orange	0	4	0	0	0	3	0	0	0	0	0	3	3	5	3	0	0	0	0	0
cn	5566cbd03c845	pink	4	5	0	0	0	4	0	0	0	0	0	5	5	4	5	4	0	0	0	0
cn	5566cbd03c845	purple	3	0	0	4	0	4	0	0	0	0	0	5	0	0	0	0	0	0	0	0
cn	5566cbd03c845	red	5	5	0	0	0	5	0	0	0	0	0	5	5	5	5	5	0	0	0	0
cn	5566cbd03c845	turquoise	0	0	1	0	1	0	0	2	1	0	0	0	0	0	0	0	0	0	2	0
cn	5566cbd03c845	white	0	0	0	0	4	0	5	0	5	4	0	0	0	0	0	0	5	0	5	5
cn	5566cbd03c845	yellow	4	4	0	0	0	5	0	0	0	0	0	3	4	5	4	4	0	0	0	0
cn	5566ccde453b2	black	0	0	0	0	0	0	5	0	0	0	4	0	0	0	0	0	0	0	0	2
cn	5566ccde453b2	blue	0	0	0	3	0	0	0	0	0	0	0	0	0	0	0	0	0	0	5	0
cn	5566ccde453b2	brown	0	0	0	0	0	0	0	0	0	0	0	0	0	0	0	0	0	0	0	0
cn	5566ccde453b2	green	0	0	0	0	0	0	0	0	0	0	0	0	0	0	0	0	0	4	0	0
cn	5566ccde453b2	grey	0	0	0	0	0	0	4	0	0	5	0	0	0	0	0	0	3	0	0	0
cn	5566ccde453b2	orange	0	0	0	0	0	2	0	0	0	0	0	4	0	0	0	0	0	0	0	0
cn	5566ccde453b2	pink	0	3	0	0	0	0	0	0	0	0	0	0	3	2	0	0	0	0	0	0
cn	5566ccde453b2	purple	0	0	0	0	3	0	0	2	0	3	0	0	0	0	0	0	0	0	0	0
cn	5566ccde453b2	red	0	0	5	0	0	0	0	0	0	0	0	0	3	5	0	0	0	0	0	0
cn	5566ccde453b2	turquoise	0	0	0	0	0	0	0	0	0	0	0	0	0	0	0	0	0	0	3	0
cn	5566ccde453b2	white	0	0	0	0	0	0	0	0	3	0	0	0	0	0	0	0	0	0	0	0
cn	5566ccde453b2	yellow	0	0	0	0	0	0	0	0	0	0	0	0	0	0	0	0	0	0	0	2
cn	5566cdcf2d192	black	4	0	0	0	0	0	0	0	0	0	0	0	0	0	0	0	0	0	0	0
cn	5566cdcf2d192	blue	0	0	0	0	0	0	0	0	0	0	0	0	0	0	0	0	0	0	0	0
cn	5566cdcf2d192	brown	0	0	0	0	0	0	0	0	0	0	0	0	0	0	0	0	0	0	0	0
cn	5566cdcf2d192	green	0	0	0	0	0	0	0	0	0	0	0	5	0	0	0	0	0	0	0	0
cn	5566cdcf2d192	grey	0	0	0	0	0	0	0	0	0	0	0	4	0	0	0	0	0	0	0	0
cn	5566cdcf2d192	orange	0	0	0	0	0	0	0	0	0	0	0	0	0	0	0	0	0	0	0	0
cn	5566cdcf2d192	pink	0	0	0	0	0	0	0	0	0	0	0	0	0	5	0	0	0	0	0	0
cn	5566cdcf2d192	purple	0	0	0	0	0	0	0	0	0	0	0	0	0	0	0	0	0	0	0	0
cn	5566cdcf2d192	red	0	0	0	0	0	4	0	0	0	0	0	0	0	0	0	4	0	0	0	0
cn	5566cdcf2d192	turquoise	0	0	0	0	0	0	0	0	0	0	0	0	0	0	0	0	0	0	0	0
cn	5566cdcf2d192	white	0	0	0	0	0	0	0	0	0	0	0	0	0	0	0	0	0	0	0	0
cn	5566cdcf2d192	yellow	0	5	0	0	0	0	0	0	0	0	0	0	5	0	5	0	0	0	0	0
cn	5566cf8319fa7	black	0	0	0	0	0	0	5	0	5	0	0	0	0	0	0	0	5	0	0	0
cn	5566cf8319fa7	blue	0	0	0	0	0	0	1	0	0	0	0	0	0	0	0	0	2	0	0	0
cn	5566cf8319fa7	brown	0	0	0	0	0	0	0	0	0	0	0	0	0	0	0	0	3	0	0	0
cn	5566cf8319fa7	green	0	0	0	0	0	0	0	0	3	0	0	0	0	0	0	0	0	0	0	0
cn	5566cf8319fa7	grey	0	0	0	0	3	0	0	0	0	0	0	0	0	0	0	0	0	0	0	0
cn	5566cf8319fa7	orange	0	0	0	0	0	0	0	0	0	0	0	0	0	0	4	0	0	0	0	0
cn	5566cf8319fa7	pink	0	4	0	0	0	0	0	0	0	0	0	0	3	4	4	0	0	0	0	0
cn	5566cf8319fa7	purple	0	0	0	0	0	0	0	0	0	0	0	0	0	0	0	0	0	0	0	2
cn	5566cf8319fa7	red	0	0	3	0	0	0	0	0	0	0	0	0	0	0	0	0	0	0	0	0
cn	5566cf8319fa7	turquoise	0	0	0	0	0	0	0	0	0	0	0	0	0	0	0	0	0	3	0	0
cn	5566cf8319fa7	white	0	0	0	0	0	0	0	0	0	0	0	0	0	0	0	0	0	0	0	0
cn	5566cf8319fa7	yellow	0	0	0	0	0	0	0	0	0	0	0	0	0	0	0	0	0	0	0	0
cn	5566e82aeb721	black	0	0	0	0	0	0	0	0	0	0	0	0	0	0	0	0	0	0	1	0
cn	5566e82aeb721	blue	0	0	0	0	0	0	0	0	0	0	0	0	0	0	4	0	0	0	0	0
cn	5566e82aeb721	brown	2	0	0	0	0	2	0	0	0	0	0	0	0	0	0	0	0	0	0	0
cn	5566e82aeb721	green	0	0	0	0	0	0	0	0	0	0	0	0	0	0	0	0	0	3	0	0
cn	5566e82aeb721	grey	0	0	0	0	0	0	0	0	0	0	0	0	0	0	0	0	0	3	0	0
cn	5566e82aeb721	orange	0	0	0	0	0	3	0	0	0	0	0	0	0	0	0	0	0	0	0	0
cn	5566e82aeb721	pink	0	3	0	0	0	0	0	0	0	0	0	0	0	0	0	0	0	0	0	0
cn	5566e82aeb721	purple	0	0	0	0	0	0	0	0	0	0	0	0	0	0	3	0	0	0	0	0
cn	5566e82aeb721	red	0	0	0	0	0	0	0	0	0	0	0	0	0	5	0	0	0	0	0	0
cn	5566e82aeb721	turquoise	0	2	0	0	0	0	0	0	0	0	0	0	0	0	0	0	0	0	0	0
cn	5566e82aeb721	white	0	0	0	0	0	0	0	0	0	0	0	0	3	0	0	0	0	0	0	0
cn	5566e82aeb721	yellow	0	0	0	0	0	4	0	0	0	0	0	0	0	0	0	0	0	0	0	0
cn	5566fca428fa7	black	0	0	0	0	0	0	5	0	0	0	0	0	0	0	0	0	5	0	0	0
cn	5566fca428fa7	blue	0	0	0	0	0	0	0	0	0	0	0	0	0	0	0	0	0	0	5	0
cn	5566fca428fa7	brown	0	0	0	0	0	0	0	0	0	0	4	0	0	0	0	0	0	0	0	0
cn	5566fca428fa7	green	0	0	0	0	0	0	0	0	0	0	0	4	0	0	0	0	0	0	0	0
cn	5566fca428fa7	grey	0	0	0	0	0	0	4	0	0	0	0	0	0	0	0	0	0	0	0	0
cn	5566fca428fa7	orange	0	0	0	0	0	0	0	0	0	0	0	0	4	0	4	0	0	0	0	0
cn	5566fca428fa7	pink	4	0	0	0	0	0	0	0	0	0	0	0	0	0	0	0	0	0	0	0
cn	5566fca428fa7	purple	0	0	0	0	0	0	0	0	0	0	0	0	0	0	0	5	0	0	0	0
cn	5566fca428fa7	red	0	0	5	0	0	0	0	0	0	0	0	0	0	5	0	0	0	0	0	0
cn	5566fca428fa7	turquoise	0	0	0	0	5	0	0	0	0	0	0	0	0	0	0	0	0	0	0	0
cn	5566fca428fa7	white	4	0	0	0	0	0	0	0	0	0	0	0	0	0	0	0	0	0	0	0
cn	5566fca428fa7	yellow	0	4	0	0	0	0	0	0	0	0	0	0	0	0	0	4	0	0	0	0
cn	5566fcab8a75b	black	0	0	0	0	0	0	0	0	4	0	0	0	0	0	0	0	0	0	0	0
cn	5566fcab8a75b	blue	0	0	0	0	0	0	0	0	0	0	0	0	0	0	0	5	0	0	0	0
cn	5566fcab8a75b	brown	0	0	0	0	0	0	0	0	0	0	0	4	0	0	0	0	0	0	0	0
cn	5566fcab8a75b	green	0	0	0	0	0	0	0	0	0	0	0	0	0	0	0	0	0	0	0	0
cn	5566fcab8a75b	grey	0	0	0	0	0	0	4	0	0	0	0	0	0	0	0	0	0	0	0	0
cn	5566fcab8a75b	orange	0	0	0	0	0	0	0	0	0	0	0	0	0	0	0	0	0	0	0	0
cn	5566fcab8a75b	pink	0	0	0	0	0	0	0	0	0	0	0	0	0	0	4	0	0	0	0	0
cn	5566fcab8a75b	purple	0	0	0	0	4	0	0	0	0	0	0	0	0	0	0	0	0	0	0	0
cn	5566fcab8a75b	red	0	0	0	0	0	0	0	0	0	0	0	0	5	0	0	0	0	0	0	0
cn	5566fcab8a75b	turquoise	0	0	0	0	0	0	0	0	0	0	0	4	0	0	0	0	0	0	0	0
cn	5566fcab8a75b	white	0	0	0	0	0	0	0	0	0	0	0	5	0	0	0	0	0	0	0	0
cn	5566fcab8a75b	yellow	0	0	0	0	0	0	0	0	0	0	0	0	0	0	0	0	0	0	5	0
cn	55670088b38b6	black	0	0	0	0	4	0	5	5	5	5	5	0	0	0	0	0	0	0	5	0
cn	55670088b38b6	blue	2	0	0	3	0	2	3	0	0	0	0	4	0	2	5	4	3	4	3	0
cn	55670088b38b6	brown	0	0	0	0	0	0	0	0	0	0	0	0	0	0	0	0	0	0	0	0
cn	55670088b38b6	green	0	4	0	0	0	4	0	3	0	3	3	0	0	0	5	2	4	5	0	3
cn	55670088b38b6	grey	0	0	2	0	3	0	5	2	3	3	2	0	0	0	0	0	5	0	3	0
cn	55670088b38b6	orange	5	4	0	4	0	5	0	0	0	0	0	4	4	2	4	4	0	0	0	0
cn	55670088b38b6	pink	4	5	0	0	0	4	0	0	0	0	0	4	0	5	4	0	0	0	0	3
cn	55670088b38b6	purple	0	0	0	0	0	0	4	0	0	0	0	4	0	4	0	0	0	0	4	0
cn	55670088b38b6	red	5	4	5	2	0	0	0	5	5	0	5	3	5	5	4	5	0	0	0	4
cn	55670088b38b6	turquoise	0	0	0	0	0	0	0	0	0	0	0	0	0	0	0	0	0	5	0	0
cn	55670088b38b6	white	0	5	0	0	5	0	0	0	0	0	0	0	0	5	0	0	0	0	5	0
cn	55670088b38b6	yellow	0	4	0	4	0	4	4	0	0	5	4	0	0	0	0	4	0	0	4	0
cn	556705eb22e33	black	0	0	0	2	0	0	0	0	2	0	3	1	0	0	0	5	0	0	3	0
cn	556705eb22e33	blue	1	3	0	2	1	2	0	0	0	0	0	0	0	0	3	1	0	3	4	0
cn	556705eb22e33	brown	0	0	1	0	1	0	1	2	2	0	0	0	0	0	0	0	0	0	0	1
cn	556705eb22e33	green	3	5	0	2	0	4	0	0	0	0	0	3	3	3	3	3	0	4	0	0
cn	556705eb22e33	grey	0	0	5	0	0	0	5	1	1	4	0	0	0	0	0	0	0	0	3	2
cn	556705eb22e33	orange	4	5	0	0	0	5	0	0	0	0	0	4	5	4	5	5	0	2	0	0
cn	556705eb22e33	pink	0	1	0	1	0	4	0	0	0	0	0	1	1	5	4	0	0	4	0	0
cn	556705eb22e33	purple	5	1	0	0	0	0	0	0	0	0	0	1	0	0	0	5	0	2	0	0
cn	556705eb22e33	red	0	0	5	0	0	0	0	0	5	1	0	0	5	5	5	0	0	0	0	0
cn	556705eb22e33	turquoise	0	3	0	1	0	0	0	0	0	0	0	3	1	0	1	3	0	1	0	0
cn	556705eb22e33	white	0	0	0	0	0	0	0	0	0	0	0	0	0	0	0	0	0	0	0	0
cn	556705eb22e33	yellow	3	3	0	1	4	2	0	0	0	0	0	5	3	3	4	3	0	2	0	0
cn	5567b7bb6cc4d	black	2	2	0	0	0	2	2	2	5	1	4	3	1	0	1	3	3	3	4	1
cn	5567b7bb6cc4d	blue	2	3	0	2	0	3	0	0	0	2	0	2	4	3	3	2	0	1	2	2
cn	5567b7bb6cc4d	brown	3	0	0	0	0	4	0	0	0	0	0	0	0	4	0	3	0	0	3	0
cn	5567b7bb6cc4d	green	3	5	0	5	0	5	0	0	0	0	0	5	4	5	5	2	0	4	3	0
cn	5567b7bb6cc4d	grey	2	0	0	4	0	4	0	0	0	3	0	0	0	3	2	0	3	3	4	2
cn	5567b7bb6cc4d	orange	4	2	1	0	0	4	0	0	0	0	0	2	4	3	1	4	0	0	0	0
cn	5567b7bb6cc4d	pink	3	5	0	0	0	5	0	0	0	0	0	5	4	5	5	3	0	0	0	0
cn	5567b7bb6cc4d	purple	4	2	2	0	0	3	3	3	3	0	0	3	2	1	2	5	0	4	2	2
cn	5567b7bb6cc4d	red	5	5	5	0	0	5	0	0	0	0	0	5	5	5	5	5	0	0	0	1
cn	5567b7bb6cc4d	turquoise	0	2	0	0	0	0	0	0	0	0	0	0	0	0	2	0	0	0	0	0
cn	5567b7bb6cc4d	white	1	4	0	5	5	5	4	3	5	4	0	4	3	4	4	2	3	4	5	3
cn	5567b7bb6cc4d	yellow	1	2	0	3	0	3	1	0	0	2	0	3	4	3	4	4	0	0	1	3
cn	5567b85569d7e	black	0	0	0	0	0	0	0	0	5	0	0	0	0	0	0	0	0	0	0	0
cn	5567b85569d7e	blue	0	0	0	0	0	0	0	0	0	0	0	0	0	0	0	0	0	0	4	0
cn	5567b85569d7e	brown	0	0	0	0	0	0	0	0	0	0	0	0	0	0	0	0	0	0	0	0
cn	5567b85569d7e	green	0	0	0	0	0	0	0	0	0	0	0	0	0	4	0	5	0	0	0	0
cn	5567b85569d7e	grey	0	0	0	0	0	0	5	5	0	0	0	0	0	0	0	0	5	0	0	0
cn	5567b85569d7e	orange	5	0	0	0	0	4	0	0	0	0	0	0	0	0	5	0	0	0	0	0
cn	5567b85569d7e	pink	0	0	0	0	0	0	0	0	0	0	0	0	0	5	5	0	0	0	0	0
cn	5567b85569d7e	purple	5	5	0	0	0	0	0	0	0	0	0	0	0	0	0	0	0	0	0	0
cn	5567b85569d7e	red	0	0	3	0	0	0	0	0	0	0	0	0	0	0	0	0	0	0	0	0
cn	5567b85569d7e	turquoise	0	0	0	0	0	0	0	0	0	0	3	0	0	0	0	0	0	0	0	0
cn	5567b85569d7e	white	0	0	0	0	0	5	0	0	0	0	0	0	0	0	0	0	0	0	0	0
cn	5567b85569d7e	yellow	0	0	0	0	0	0	0	0	0	0	0	5	0	0	0	0	0	0	0	0
cn	5567baa492eaf	black	0	0	5	0	0	0	5	0	5	0	5	0	0	0	0	0	0	0	5	0
cn	5567baa492eaf	blue	0	0	0	0	0	5	0	0	0	0	0	0	0	0	5	0	0	0	0	0
cn	5567baa492eaf	brown	0	0	0	0	4	0	4	4	0	3	0	0	0	0	0	0	3	0	2	4
cn	5567baa492eaf	green	0	5	0	0	0	5	0	0	0	0	0	5	0	0	0	0	0	5	0	0
cn	5567baa492eaf	grey	0	0	0	5	5	0	5	0	0	5	2	0	0	0	0	0	5	5	5	5
cn	5567baa492eaf	orange	0	0	3	0	0	0	0	0	0	0	0	0	0	0	0	5	0	0	0	0
cn	5567baa492eaf	pink	5	5	0	0	0	5	0	0	0	0	0	0	5	5	5	5	0	0	0	0
cn	5567baa492eaf	purple	0	0	5	0	0	0	0	0	3	0	5	0	0	0	0	5	0	0	0	0
cn	5567baa492eaf	red	0	0	5	0	0	5	0	0	0	0	0	0	0	0	0	0	0	0	0	5
cn	5567baa492eaf	turquoise	0	0	0	0	0	0	0	0	0	0	0	4	0	0	4	0	0	0	0	0
cn	5567baa492eaf	white	0	0	0	0	0	0	0	0	0	0	0	0	0	0	0	0	0	0	0	0
cn	5567baa492eaf	yellow	0	4	0	0	0	0	0	0	0	0	0	0	5	0	5	0	0	0	0	0
cn	5567baba40dac	black	0	0	4	0	0	0	0	3	0	0	4	0	0	0	0	0	0	0	3	0
cn	5567baba40dac	blue	4	0	0	0	0	0	0	0	0	0	0	4	0	0	0	0	0	3	0	0
cn	5567baba40dac	brown	0	0	0	0	3	0	0	0	4	0	4	0	0	0	0	0	3	0	3	0
cn	5567baba40dac	green	0	4	0	0	0	0	0	0	0	0	0	4	0	0	0	0	0	0	0	0
cn	5567baba40dac	grey	0	0	3	0	0	0	3	3	0	4	4	0	0	0	0	0	4	0	3	4
cn	5567baba40dac	orange	0	4	0	0	0	4	0	0	0	0	0	0	4	3	0	0	0	0	0	0
cn	5567baba40dac	pink	3	3	0	0	0	0	0	0	0	0	0	4	3	3	0	0	0	0	0	0
cn	5567baba40dac	purple	3	0	0	0	0	0	0	0	0	0	3	0	0	0	0	5	0	0	0	0
cn	5567baba40dac	red	5	5	0	0	0	0	0	0	0	0	0	4	5	5	5	5	0	0	0	0
cn	5567baba40dac	turquoise	0	0	4	0	0	0	0	0	4	3	0	0	0	0	0	0	0	0	0	4
cn	5567baba40dac	white	3	4	0	0	0	0	0	0	0	0	0	0	4	4	0	0	0	0	0	0
cn	5567baba40dac	yellow	0	0	0	0	0	0	0	0	0	0	0	0	4	0	0	4	0	0	0	0
cn	5567bf0967138	black	0	0	3	0	0	0	0	5	0	0	5	0	0	0	0	0	0	0	5	0
cn	5567bf0967138	blue	0	0	0	0	0	0	0	0	0	0	0	0	0	0	0	0	0	0	5	4
cn	5567bf0967138	brown	0	0	0	0	0	0	0	0	0	0	0	0	0	0	0	0	0	0	0	0
cn	5567bf0967138	green	0	0	0	0	0	0	0	0	0	0	0	0	5	0	5	0	0	0	0	0
cn	5567bf0967138	grey	0	0	3	3	3	0	0	0	0	3	3	0	0	0	0	0	0	0	3	0
cn	5567bf0967138	orange	0	0	0	0	0	0	0	0	0	0	0	0	0	3	4	0	3	0	0	0
cn	5567bf0967138	pink	0	4	0	0	0	0	0	0	0	0	0	4	4	0	3	0	0	0	0	0
cn	5567bf0967138	purple	0	0	0	0	0	0	4	0	0	4	0	0	0	0	0	0	3	0	0	0
cn	5567bf0967138	red	0	0	0	0	0	0	0	0	3	0	0	0	0	5	0	0	0	0	0	0
cn	5567bf0967138	turquoise	0	0	0	0	0	0	0	0	0	0	0	0	4	0	4	0	0	0	0	4
cn	5567bf0967138	white	0	0	0	0	0	0	0	0	4	0	0	0	0	5	0	0	0	0	0	0
cn	5567bf0967138	yellow	0	4	0	0	0	5	0	0	0	0	0	0	3	0	0	3	0	0	0	0
cn	5567c095eb7fe	black	0	0	0	0	0	0	0	0	4	0	4	0	0	0	0	0	0	0	0	0
cn	5567c095eb7fe	blue	3	0	0	0	0	3	0	0	0	0	0	0	0	0	0	0	0	0	0	0
cn	5567c095eb7fe	brown	0	0	0	0	0	0	0	0	0	0	0	0	0	0	0	0	0	0	2	0
cn	5567c095eb7fe	green	3	0	0	0	0	3	0	0	0	0	0	0	0	0	0	0	0	0	0	0
cn	5567c095eb7fe	grey	0	0	0	0	0	0	4	0	0	3	0	0	0	0	0	0	0	0	3	0
cn	5567c095eb7fe	orange	0	5	0	0	0	4	0	0	0	0	0	0	5	4	4	0	0	0	0	0
cn	5567c095eb7fe	pink	0	0	0	0	0	0	0	0	0	0	0	0	0	0	4	0	0	0	0	0
cn	5567c095eb7fe	purple	0	0	0	0	0	0	0	0	0	0	0	0	0	4	0	0	0	0	0	0
cn	5567c095eb7fe	red	0	4	0	0	0	0	0	0	0	0	0	4	4	0	4	0	0	0	0	0
cn	5567c095eb7fe	turquoise	0	0	0	0	0	0	0	0	0	0	0	0	0	0	0	0	0	0	0	0
cn	5567c095eb7fe	white	0	0	0	0	0	0	0	0	3	0	0	0	0	0	0	0	0	0	0	0
cn	5567c095eb7fe	yellow	0	0	0	0	0	0	0	0	0	0	0	0	5	0	0	0	0	0	0	0
cn	5567c178ed273	black	0	0	0	0	0	0	0	0	0	0	0	0	0	0	0	0	0	0	0	0
cn	5567c178ed273	blue	0	0	0	0	0	0	0	0	0	0	0	0	0	0	0	0	0	4	0	0
cn	5567c178ed273	brown	0	0	0	0	0	0	0	0	0	0	0	0	0	0	0	0	0	0	0	0
cn	5567c178ed273	green	0	2	0	1	0	1	0	0	0	0	0	0	1	0	1	0	0	2	0	0
cn	5567c178ed273	grey	0	0	0	0	0	0	2	0	0	1	0	0	0	0	0	0	2	0	2	0
cn	5567c178ed273	orange	0	4	0	0	0	2	0	0	0	0	0	3	4	1	3	2	0	0	0	0
cn	5567c178ed273	pink	0	4	0	0	0	0	0	0	0	0	0	4	4	3	4	0	0	0	0	3
cn	5567c178ed273	purple	4	2	0	0	0	2	0	0	0	0	0	0	2	3	2	0	0	0	0	0
cn	5567c178ed273	red	3	5	4	0	0	4	0	0	0	0	0	5	5	5	5	4	0	0	0	0
cn	5567c178ed273	turquoise	0	0	0	0	0	0	0	0	0	0	0	0	0	0	0	0	0	0	0	0
cn	5567c178ed273	white	0	0	0	0	0	0	0	0	0	0	0	0	0	0	0	0	0	0	0	0
cn	5567c178ed273	yellow	1	2	0	0	0	1	0	0	0	0	0	1	2	1	2	3	0	0	0	0
cn	5567c37c5aaca	black	0	0	0	0	0	0	0	0	0	0	5	0	0	0	0	0	0	0	5	0
cn	5567c37c5aaca	blue	0	0	0	4	0	0	0	0	0	0	0	4	0	0	5	0	0	0	4	0
cn	5567c37c5aaca	brown	0	0	0	0	0	0	0	0	0	0	0	0	0	0	0	0	0	0	0	4
cn	5567c37c5aaca	green	0	0	0	0	0	0	0	0	0	0	0	5	5	0	0	0	0	5	0	0
cn	5567c37c5aaca	grey	0	0	0	0	0	0	3	0	0	4	0	0	0	0	0	0	3	0	5	3
cn	5567c37c5aaca	orange	0	5	0	0	0	5	0	0	0	0	0	0	5	0	0	0	0	0	0	0
cn	5567c37c5aaca	pink	0	5	0	0	0	0	0	0	0	0	0	0	5	0	0	0	0	0	0	0
cn	5567c37c5aaca	purple	5	5	0	0	0	0	0	0	0	0	0	0	0	0	0	5	0	0	0	0
cn	5567c37c5aaca	red	0	0	0	0	0	5	0	0	0	0	0	4	0	5	0	0	0	0	0	0
cn	5567c37c5aaca	turquoise	0	0	0	0	0	0	0	0	0	0	0	0	0	0	0	0	0	0	0	3
cn	5567c37c5aaca	white	0	0	0	0	0	0	0	0	0	0	0	0	0	5	0	0	0	0	0	0
cn	5567c37c5aaca	yellow	0	0	0	0	0	0	0	0	0	0	0	0	5	0	0	5	0	0	0	0
cn	556a65a88fa79	black	0	0	0	0	0	0	0	3	3	2	5	0	0	0	0	0	0	0	0	1
cn	556a65a88fa79	blue	0	0	0	0	0	0	0	0	0	5	0	0	0	0	0	0	0	0	5	0
cn	556a65a88fa79	brown	0	0	0	0	0	0	0	0	0	0	0	0	0	0	0	0	0	0	0	0
cn	556a65a88fa79	green	0	0	0	0	0	0	0	0	0	0	0	0	0	0	5	0	0	0	0	0
cn	556a65a88fa79	grey	0	0	0	0	5	0	5	3	4	0	0	0	0	0	0	0	0	0	4	0
cn	556a65a88fa79	orange	0	5	0	0	0	0	0	0	0	0	0	5	0	0	1	0	0	0	0	0
cn	556a65a88fa79	pink	0	0	0	0	0	5	0	0	0	0	0	0	0	5	0	0	0	0	0	0
cn	556a65a88fa79	purple	0	0	0	0	0	0	0	0	0	0	0	0	0	0	0	5	1	0	0	0
cn	556a65a88fa79	red	0	0	5	0	0	0	0	0	5	0	5	0	5	0	0	0	0	0	0	0
cn	556a65a88fa79	turquoise	0	0	0	0	0	0	0	0	0	0	0	0	0	0	0	0	0	0	0	2
cn	556a65a88fa79	white	1	0	0	1	0	2	0	0	0	0	0	0	0	0	0	5	0	0	2	0
cn	556a65a88fa79	yellow	0	0	0	0	0	0	0	0	0	0	0	0	0	0	0	0	0	0	0	0
cn	556a8e3930dae	black	0	0	0	0	0	0	3	0	3	0	0	0	0	0	0	0	0	0	0	0
cn	556a8e3930dae	blue	0	1	0	0	0	0	0	0	0	0	0	0	0	0	1	0	0	0	0	0
cn	556a8e3930dae	brown	0	0	0	0	0	0	0	0	0	0	0	0	0	0	0	0	0	0	0	0
cn	556a8e3930dae	green	0	2	0	0	0	0	0	0	0	0	0	0	0	0	2	0	0	0	0	0
cn	556a8e3930dae	grey	0	0	2	0	0	0	0	2	0	0	0	0	0	0	0	0	0	0	2	0
cn	556a8e3930dae	orange	2	4	0	0	0	0	0	0	0	0	0	0	5	0	4	0	0	0	0	0
cn	556a8e3930dae	pink	0	3	0	0	0	0	0	0	0	0	0	0	0	3	2	0	0	0	0	0
cn	556a8e3930dae	purple	0	0	0	0	0	0	0	0	1	1	0	0	0	0	0	0	0	0	0	0
cn	556a8e3930dae	red	0	0	4	0	0	0	0	0	0	0	0	0	0	4	0	0	0	0	0	0
cn	556a8e3930dae	turquoise	0	0	0	0	0	0	0	0	0	0	0	0	0	0	0	0	0	0	0	0
cn	556a8e3930dae	white	0	0	0	0	0	0	0	0	0	0	0	0	0	0	0	0	0	0	0	0
cn	556a8e3930dae	yellow	0	3	0	0	0	0	0	0	0	0	0	0	2	0	0	0	0	0	0	0
cn	556af18867525	black	0	0	0	0	0	0	0	0	4	4	0	0	0	0	0	0	4	0	5	0
cn	556af18867525	blue	0	0	0	0	0	2	0	0	0	0	0	3	0	0	0	0	0	3	0	0
cn	556af18867525	brown	0	0	0	3	0	0	4	4	0	4	0	0	0	0	0	0	4	0	2	0
cn	556af18867525	green	0	0	0	0	2	0	0	3	0	0	0	4	0	0	0	0	0	5	0	0
cn	556af18867525	grey	0	0	0	0	0	0	2	3	0	0	0	0	0	0	0	0	3	0	4	0
cn	556af18867525	orange	3	0	4	0	0	4	0	0	3	0	0	4	0	0	4	0	0	0	0	0
cn	556af18867525	pink	0	2	0	0	0	4	0	0	0	0	0	4	2	4	3	0	0	0	0	0
cn	556af18867525	purple	3	0	0	3	0	0	0	0	0	0	0	0	0	2	0	3	0	0	3	4
cn	556af18867525	red	4	0	5	0	0	3	0	0	4	0	5	5	4	5	5	0	0	0	0	3
cn	556af18867525	turquoise	0	0	0	0	0	0	0	2	0	0	0	0	0	0	3	0	0	0	0	0
cn	556af18867525	white	0	3	0	0	0	0	0	0	0	0	0	0	0	0	0	0	0	0	0	0
cn	556af18867525	yellow	0	2	0	0	0	4	0	0	0	0	0	4	2	3	4	3	0	0	0	0
cn	556ba8b5609c5	black	0	0	0	0	0	0	0	0	4	0	0	0	0	0	0	0	0	0	0	0
cn	556ba8b5609c5	blue	0	0	0	0	0	0	0	0	0	0	0	0	0	0	0	0	0	0	0	0
cn	556ba8b5609c5	brown	0	0	0	0	0	0	0	0	0	0	0	0	0	0	0	0	0	0	0	0
cn	556ba8b5609c5	green	0	0	0	0	0	0	0	0	0	0	0	0	0	0	0	0	0	0	0	0
cn	556ba8b5609c5	grey	0	0	0	0	0	0	0	0	0	0	0	0	0	0	0	0	0	0	0	0
cn	556ba8b5609c5	orange	0	2	0	0	0	0	0	0	0	0	0	0	2	0	2	0	0	0	0	0
cn	556ba8b5609c5	pink	0	0	0	0	0	0	0	0	0	0	0	0	2	2	2	0	0	0	0	0
cn	556ba8b5609c5	purple	0	0	0	0	0	0	0	0	0	0	0	0	0	0	0	0	0	0	0	0
cn	556ba8b5609c5	red	0	5	4	0	0	0	0	0	2	0	2	0	5	4	5	0	0	0	0	2
cn	556ba8b5609c5	turquoise	0	0	0	0	0	0	0	0	0	0	0	0	0	0	0	0	0	0	0	0
cn	556ba8b5609c5	white	0	0	0	0	0	0	0	0	3	0	0	0	0	0	0	0	0	0	0	0
cn	556ba8b5609c5	yellow	0	3	0	0	0	0	0	0	0	0	0	0	3	0	3	0	0	0	0	0
cn	556c23a9ecd18	black	0	0	0	0	0	0	5	0	0	0	0	0	0	0	0	0	0	0	0	0
cn	556c23a9ecd18	blue	0	0	0	4	0	5	0	0	0	0	0	0	0	0	0	0	0	0	0	0
cn	556c23a9ecd18	brown	0	0	0	0	0	0	0	0	0	0	0	0	0	0	0	0	0	0	4	4
cn	556c23a9ecd18	green	0	4	0	0	0	0	0	0	0	0	0	0	0	0	0	0	0	0	0	0
cn	556c23a9ecd18	grey	0	0	0	5	4	0	0	0	0	0	0	0	0	0	0	0	0	0	0	0
cn	556c23a9ecd18	orange	0	5	0	0	0	0	0	0	0	0	0	0	0	5	0	0	0	0	0	0
cn	556c23a9ecd18	pink	0	0	0	0	0	5	0	0	0	0	0	5	0	0	0	0	0	0	0	0
cn	556c23a9ecd18	purple	0	0	0	0	0	0	0	0	0	0	0	4	0	4	0	0	0	0	0	0
cn	556c23a9ecd18	red	0	0	0	0	5	0	0	0	0	0	0	0	4	0	0	0	0	0	0	0
cn	556c23a9ecd18	turquoise	0	0	0	0	0	0	0	0	0	0	0	0	5	0	0	0	0	0	0	0
cn	556c23a9ecd18	white	0	0	0	0	0	0	0	0	0	0	0	0	0	0	0	0	0	5	0	0
cn	556c23a9ecd18	yellow	0	0	0	0	0	0	0	0	0	0	3	0	4	0	0	0	0	0	0	0
cn	556c77ac497cb	black	0	0	0	0	0	0	3	0	5	0	0	0	0	0	0	0	0	0	4	0
cn	556c77ac497cb	blue	0	0	0	0	0	0	0	0	0	0	0	0	0	3	0	0	0	0	5	0
cn	556c77ac497cb	brown	0	0	3	0	0	0	0	0	0	0	0	0	0	0	0	0	0	0	0	0
cn	556c77ac497cb	green	2	4	0	0	0	0	0	0	0	0	0	0	2	0	0	0	0	0	0	0
cn	556c77ac497cb	grey	0	0	4	0	4	0	4	4	2	0	3	0	0	0	0	0	0	0	0	0
cn	556c77ac497cb	orange	0	4	0	2	0	0	0	0	0	0	0	3	3	3	4	0	0	0	0	0
cn	556c77ac497cb	pink	0	5	0	0	0	3	0	0	0	0	0	3	0	5	0	0	0	0	0	0
cn	556c77ac497cb	purple	0	0	0	0	0	4	0	0	0	0	0	4	0	0	4	3	0	0	0	0
cn	556c77ac497cb	red	4	3	0	0	0	4	0	0	0	0	0	2	4	5	4	5	0	0	0	0
cn	556c77ac497cb	turquoise	5	0	0	0	0	2	0	0	0	0	0	3	0	0	3	0	0	0	0	0
cn	556c77ac497cb	white	0	0	0	0	3	0	0	4	4	0	0	0	3	0	0	0	0	3	0	0
cn	556c77ac497cb	yellow	0	0	0	0	0	0	0	0	0	0	0	2	5	3	0	0	0	0	0	0
cn	556c77f10e569	black	0	0	0	0	0	0	0	0	0	0	0	0	0	0	0	0	0	5	0	0
cn	556c77f10e569	blue	0	0	0	0	0	0	0	0	0	0	0	5	0	0	0	0	0	0	0	0
cn	556c77f10e569	brown	0	0	4	0	0	0	0	0	0	0	0	0	0	0	0	0	3	0	0	0
cn	556c77f10e569	green	0	0	0	0	0	0	0	0	0	0	0	5	0	0	0	0	0	0	0	0
cn	556c77f10e569	grey	0	0	0	0	0	0	0	0	0	4	0	0	0	0	0	0	0	0	0	0
cn	556c77f10e569	orange	0	0	0	0	0	5	0	0	0	0	0	0	0	0	0	0	0	0	0	0
cn	556c77f10e569	pink	0	0	0	0	0	0	0	0	0	0	0	0	0	0	5	0	0	0	0	0
cn	556c77f10e569	purple	0	0	0	0	0	5	0	0	0	0	0	0	0	0	0	0	0	0	0	0
cn	556c77f10e569	red	0	5	0	0	0	0	0	0	0	0	0	0	0	0	0	0	0	0	0	0
cn	556c77f10e569	turquoise	0	0	0	0	5	0	0	0	0	0	0	0	0	0	0	0	0	0	0	0
cn	556c77f10e569	white	0	0	0	0	0	0	0	0	0	0	0	0	0	0	0	0	0	5	0	0
cn	556c77f10e569	yellow	0	0	0	0	0	0	0	4	0	0	0	0	0	0	0	0	0	0	0	0
cn	556c78038111e	black	0	0	0	0	0	0	5	5	5	0	5	0	0	0	0	0	0	0	0	0
cn	556c78038111e	blue	0	0	0	0	0	0	0	0	0	0	0	0	0	0	0	0	0	4	0	0
cn	556c78038111e	brown	0	0	3	0	0	0	4	0	0	0	4	0	0	0	0	0	0	0	0	0
cn	556c78038111e	green	0	5	0	0	0	0	0	0	0	0	0	0	5	0	5	0	0	0	0	0
cn	556c78038111e	grey	0	0	0	0	0	0	5	0	0	4	0	0	0	0	0	0	4	0	5	4
cn	556c78038111e	orange	0	4	0	0	0	0	0	0	0	0	0	0	4	0	0	0	0	0	0	0
cn	556c78038111e	pink	0	3	0	0	0	0	0	0	0	0	0	5	5	5	5	0	0	0	0	0
cn	556c78038111e	purple	0	0	5	0	0	0	0	4	0	0	4	0	0	0	0	0	0	0	0	0
cn	556c78038111e	red	5	5	0	0	0	5	0	0	0	0	0	0	5	5	5	5	0	0	0	0
cn	556c78038111e	turquoise	0	0	0	0	0	0	0	0	0	0	0	0	0	0	5	0	0	4	0	0
cn	556c78038111e	white	0	0	0	0	0	0	0	0	0	0	0	0	0	0	0	0	0	0	5	0
cn	556c78038111e	yellow	0	0	0	0	0	0	0	0	0	0	0	0	0	0	0	0	0	0	0	0
cn	556c84a74512d	black	0	0	0	0	0	0	0	0	5	0	0	0	0	0	0	0	0	0	0	0
cn	556c84a74512d	blue	0	0	0	0	0	0	0	0	0	0	0	0	0	0	0	0	0	0	3	0
cn	556c84a74512d	brown	0	0	0	0	0	0	0	0	0	0	0	0	0	0	0	0	0	3	0	0
cn	556c84a74512d	green	0	0	0	0	0	0	0	0	0	0	0	3	0	0	0	0	0	0	0	0
cn	556c84a74512d	grey	0	0	0	0	4	0	4	0	0	0	0	0	0	0	0	0	0	0	0	0
cn	556c84a74512d	orange	0	0	0	0	0	0	0	0	0	0	0	0	0	0	0	0	0	0	0	4
cn	556c84a74512d	pink	0	0	0	0	0	0	0	0	0	0	0	0	0	0	0	0	0	0	0	3
cn	556c84a74512d	purple	0	0	0	0	0	0	0	0	0	0	0	0	3	0	0	0	0	0	0	0
cn	556c84a74512d	red	0	0	4	0	0	0	0	0	0	0	3	0	0	0	0	0	0	0	0	0
cn	556c84a74512d	turquoise	3	0	0	0	0	3	0	0	0	0	0	0	0	0	0	0	0	0	0	0
cn	556c84a74512d	white	3	0	0	0	0	0	0	0	0	0	0	0	0	0	0	0	0	0	0	0
cn	556c84a74512d	yellow	0	0	0	0	0	0	0	0	0	0	0	0	0	0	4	0	0	0	0	0
cn	556d08568d53e	black	0	0	0	0	0	0	0	0	4	0	0	0	0	0	0	0	0	0	0	0
cn	556d08568d53e	blue	0	0	0	3	0	0	0	0	0	0	0	0	0	0	0	0	0	0	0	0
cn	556d08568d53e	brown	0	0	0	0	0	0	0	0	0	0	0	0	0	0	0	4	0	0	0	0
cn	556d08568d53e	green	0	0	0	0	0	0	0	0	0	0	0	0	0	0	5	0	0	0	0	0
cn	556d08568d53e	grey	0	0	0	0	3	0	0	0	0	0	0	0	0	0	0	0	0	0	0	0
cn	556d08568d53e	orange	0	0	0	0	0	0	0	0	0	0	0	0	0	0	3	0	0	0	0	0
cn	556d08568d53e	pink	0	0	0	0	0	0	0	0	0	0	0	0	0	4	0	0	0	0	0	0
cn	556d08568d53e	purple	0	0	0	0	0	0	0	0	0	0	0	0	0	0	0	4	0	0	0	0
cn	556d08568d53e	red	5	0	0	0	0	0	0	0	0	0	0	0	0	0	0	0	0	0	0	0
cn	556d08568d53e	turquoise	0	0	0	0	0	0	0	0	0	0	0	0	0	0	0	0	0	0	3	0
cn	556d08568d53e	white	0	0	0	0	0	5	0	0	0	0	0	0	0	0	0	0	0	0	0	0
cn	556d08568d53e	yellow	0	0	0	0	0	4	0	0	0	0	0	0	0	0	0	0	0	0	0	0
cn	556d167f6bf20	black	3	0	3	0	0	4	0	0	0	0	3	2	0	0	0	0	0	0	0	0
cn	556d167f6bf20	blue	4	3	0	0	0	4	0	0	0	0	0	4	3	4	4	3	0	4	2	0
cn	556d167f6bf20	brown	0	0	0	0	0	0	0	0	0	0	0	2	0	0	0	0	0	0	0	0
cn	556d167f6bf20	green	0	3	0	0	0	4	0	0	0	0	0	3	4	0	4	0	0	4	0	0
cn	556d167f6bf20	grey	0	0	0	0	0	0	3	0	0	0	0	0	0	0	0	0	0	0	2	0
cn	556d167f6bf20	orange	2	3	3	0	0	0	0	2	0	0	0	0	3	2	2	0	0	0	0	0
cn	556d167f6bf20	pink	4	4	0	0	0	4	0	0	0	0	0	3	4	4	4	0	0	4	0	0
cn	556d167f6bf20	purple	3	3	0	3	0	3	0	0	0	0	0	3	3	3	3	3	0	3	0	0
cn	556d167f6bf20	red	0	0	3	0	0	0	0	0	3	0	3	2	4	4	0	0	0	0	0	0
cn	556d167f6bf20	turquoise	4	0	0	0	0	4	0	0	0	0	0	3	4	0	4	0	0	0	0	0
cn	556d167f6bf20	white	0	0	0	0	0	3	0	0	3	0	0	0	0	0	0	0	0	0	3	0
cn	556d167f6bf20	yellow	3	3	0	0	0	3	0	0	0	0	0	3	3	0	0	0	0	4	0	0
cn	556d1716a0082	black	0	0	2	3	0	0	0	0	2	0	0	0	0	0	0	0	0	0	0	0
cn	556d1716a0082	blue	0	0	0	0	0	0	0	0	0	0	0	0	0	0	0	0	0	0	0	0
cn	556d1716a0082	brown	0	0	0	0	0	0	0	0	0	0	0	0	0	0	0	0	0	0	0	0
cn	556d1716a0082	green	0	4	0	0	0	0	0	0	0	0	0	0	4	0	5	0	0	4	0	0
cn	556d1716a0082	grey	0	0	0	0	0	0	3	0	0	3	0	0	0	0	0	0	0	0	3	0
cn	556d1716a0082	orange	0	5	0	0	0	0	0	0	0	0	0	3	4	0	4	0	0	0	0	0
cn	556d1716a0082	pink	0	4	0	0	0	0	0	0	0	0	0	0	4	5	4	0	0	0	0	0
cn	556d1716a0082	purple	0	0	0	0	0	3	0	0	0	0	0	4	0	0	0	0	0	0	0	0
cn	556d1716a0082	red	0	0	0	0	0	4	0	0	0	0	0	0	0	0	0	4	0	0	0	0
cn	556d1716a0082	turquoise	0	0	0	0	0	0	0	0	0	0	0	0	0	0	0	0	0	0	0	0
cn	556d1716a0082	white	0	0	0	0	0	0	0	0	0	0	0	0	0	0	0	0	0	0	0	0
cn	556d1716a0082	yellow	0	0	0	0	0	0	0	0	0	0	0	4	4	0	0	0	0	0	0	0
cn	556d5cd8f2f84	black	0	0	0	0	0	0	0	0	2	0	0	0	0	0	0	0	0	0	0	0
cn	556d5cd8f2f84	blue	0	0	0	0	0	0	0	0	0	0	0	0	0	0	0	0	0	0	4	0
cn	556d5cd8f2f84	brown	0	0	0	0	0	0	0	0	0	0	0	0	0	0	0	0	0	0	0	0
cn	556d5cd8f2f84	green	0	0	0	0	0	0	0	0	0	0	0	0	0	0	3	0	0	0	0	0
cn	556d5cd8f2f84	grey	0	0	0	0	0	0	0	0	0	0	0	0	0	0	0	0	4	0	0	0
cn	556d5cd8f2f84	orange	0	0	0	0	0	0	0	0	0	0	0	0	0	0	3	0	0	0	0	0
cn	556d5cd8f2f84	pink	0	4	0	0	0	0	0	0	0	0	0	0	0	0	0	0	0	0	0	0
cn	556d5cd8f2f84	purple	3	0	0	0	0	0	0	0	0	0	0	0	0	0	0	0	0	0	0	0
cn	556d5cd8f2f84	red	0	0	0	0	0	0	0	0	0	0	0	0	0	4	0	0	0	0	0	0
cn	556d5cd8f2f84	turquoise	0	0	0	0	0	0	0	0	0	0	0	0	0	0	0	0	0	3	0	0
cn	556d5cd8f2f84	white	0	0	0	0	0	0	0	0	0	0	0	0	0	0	0	0	0	3	0	0
cn	556d5cd8f2f84	yellow	0	0	0	0	0	3	0	0	0	0	0	0	0	0	0	0	0	0	0	0
cn	556e657d392d6	black	0	0	0	0	0	0	3	0	5	0	0	0	0	0	0	0	0	0	0	0
cn	556e657d392d6	blue	0	0	0	0	0	0	5	0	0	0	0	0	0	0	0	0	0	0	3	0
cn	556e657d392d6	brown	0	0	0	0	0	3	0	0	0	0	0	0	0	0	0	5	0	0	0	0
cn	556e657d392d6	green	0	0	0	0	0	0	0	0	0	0	0	0	0	0	0	0	0	0	0	0
cn	556e657d392d6	grey	0	0	0	0	0	0	5	0	0	0	0	0	0	0	0	0	0	0	3	0
cn	556e657d392d6	orange	0	5	0	0	0	0	0	0	0	0	0	5	0	0	0	0	0	0	0	0
cn	556e657d392d6	pink	0	0	0	0	5	0	0	0	0	0	0	0	0	0	0	0	0	0	0	5
cn	556e657d392d6	purple	0	0	0	0	0	0	0	0	0	5	0	0	0	0	0	0	0	0	0	0
cn	556e657d392d6	red	0	5	0	0	0	0	0	0	0	0	0	5	0	0	0	0	0	0	0	0
cn	556e657d392d6	turquoise	0	0	0	0	5	0	0	0	0	0	0	0	0	0	0	0	0	0	0	0
cn	556e657d392d6	white	0	0	0	0	0	0	0	0	0	0	0	0	0	0	0	0	0	0	0	0
cn	556e657d392d6	yellow	0	0	0	0	0	0	0	0	0	0	0	0	0	0	5	0	0	0	0	0
cn	556e7db218ab4	black	0	0	0	0	0	0	0	0	5	0	0	0	0	0	0	0	0	0	0	0
cn	556e7db218ab4	blue	5	5	0	0	0	0	0	0	0	0	0	5	0	0	0	0	0	0	0	0
cn	556e7db218ab4	brown	0	0	0	3	0	0	0	0	0	0	0	3	0	0	0	0	0	0	0	0
cn	556e7db218ab4	green	4	4	0	0	0	0	0	0	0	0	0	0	0	0	0	0	0	0	0	0
cn	556e7db218ab4	grey	0	0	0	0	0	0	5	0	0	0	0	0	0	0	0	0	5	0	0	0
cn	556e7db218ab4	orange	0	0	0	0	0	0	0	0	0	0	0	0	5	0	5	0	0	0	0	0
cn	556e7db218ab4	pink	0	5	0	0	0	5	0	0	0	0	0	0	0	5	0	0	0	0	0	0
cn	556e7db218ab4	purple	0	0	0	5	0	0	0	0	0	0	0	0	0	0	0	0	3	0	0	3
cn	556e7db218ab4	red	0	0	5	0	0	0	0	0	0	0	0	0	0	4	0	0	0	0	0	0
cn	556e7db218ab4	turquoise	0	0	0	0	0	0	0	2	0	0	4	0	0	0	0	0	0	0	0	0
cn	556e7db218ab4	white	0	0	0	0	0	0	0	0	0	0	0	0	0	5	0	5	0	0	0	0
cn	556e7db218ab4	yellow	0	0	0	0	1	5	0	0	0	0	0	0	0	0	0	0	0	0	0	0
cn	5.57E+11	black	0	0	0	0	0	0	0	0	5	0	0	0	0	0	0	5	0	0	0	0
cn	5.57E+11	blue	0	4	0	0	0	0	0	0	0	0	0	0	0	0	0	0	0	0	4	0
cn	5.57E+11	brown	0	0	0	0	0	0	0	4	0	0	0	0	0	0	0	0	0	0	0	0
cn	5.57E+11	green	0	0	0	0	0	0	0	0	0	0	0	0	0	0	5	0	0	5	0	0
cn	5.57E+11	grey	0	0	0	0	0	0	0	0	0	0	0	0	0	0	0	0	0	0	4	0
cn	5.57E+11	orange	0	5	4	0	0	0	0	0	0	0	0	0	0	4	0	0	0	0	0	0
cn	5.57E+11	pink	0	4	0	0	0	0	0	0	0	0	0	0	0	4	0	0	0	0	0	0
cn	5.57E+11	purple	0	0	0	0	0	0	0	0	0	0	0	0	0	0	0	4	3	0	0	0
cn	5.57E+11	red	0	0	5	0	0	0	0	0	0	0	0	0	5	0	0	0	0	0	0	0
cn	5.57E+11	turquoise	0	0	0	0	0	0	4	0	0	0	0	0	0	0	0	0	0	0	0	0
cn	5.57E+11	white	0	0	0	0	0	0	0	0	0	0	0	0	0	0	0	0	0	4	0	0
cn	5.57E+11	yellow	0	0	4	0	0	0	0	0	0	0	0	4	0	0	0	0	0	0	0	0
cn	557e9f863abb9	black	0	0	0	0	0	0	0	5	0	0	0	0	0	0	0	0	0	0	0	0
cn	557e9f863abb9	blue	0	0	0	0	0	0	0	0	0	0	0	0	0	0	0	0	0	5	0	0
cn	557e9f863abb9	brown	0	0	0	0	0	0	0	0	0	0	0	0	0	0	0	0	0	0	0	0
cn	557e9f863abb9	green	4	0	0	0	0	0	0	0	0	0	0	5	0	0	0	0	0	0	0	0
cn	557e9f863abb9	grey	0	0	0	0	0	0	4	0	3	0	4	0	0	0	0	0	0	0	0	0
cn	557e9f863abb9	orange	5	0	0	0	0	5	0	0	0	0	0	0	0	4	0	5	0	0	0	0
cn	557e9f863abb9	pink	4	0	0	0	0	5	0	0	0	0	0	0	0	5	0	0	0	0	0	0
cn	557e9f863abb9	purple	0	0	0	0	0	0	0	0	0	0	0	0	0	0	0	0	0	0	0	0
cn	557e9f863abb9	red	0	0	0	0	0	0	0	0	0	0	0	5	5	0	0	5	0	0	0	0
cn	557e9f863abb9	turquoise	0	0	0	0	0	0	4	0	0	0	0	0	0	0	0	0	0	0	0	0
cn	557e9f863abb9	white	0	0	0	4	0	0	0	0	0	0	0	0	0	0	0	0	0	4	5	0
cn	557e9f863abb9	yellow	0	0	0	0	0	4	0	0	0	0	0	0	5	0	5	0	0	0	0	0
cn	55821cac5da58	black	0	0	0	0	0	0	0	0	5	0	5	0	0	0	0	0	0	0	0	0
cn	55821cac5da58	blue	0	0	0	5	0	0	0	0	0	0	0	0	0	0	0	0	0	0	5	0
cn	55821cac5da58	brown	0	0	0	0	0	5	0	0	0	0	0	0	0	0	0	0	0	0	0	0
cn	55821cac5da58	green	0	5	0	0	0	0	0	0	0	0	0	0	0	0	0	0	0	5	0	0
cn	55821cac5da58	grey	0	0	5	0	0	0	5	0	0	0	0	0	0	0	0	0	0	0	0	0
cn	55821cac5da58	orange	0	0	0	0	0	0	0	0	0	0	0	0	0	0	5	0	0	5	0	0
cn	55821cac5da58	pink	0	5	0	0	0	0	0	0	0	0	0	5	0	0	5	0	0	0	0	0
cn	55821cac5da58	purple	0	0	0	0	0	5	0	0	0	0	0	0	0	0	0	0	0	0	0	0
cn	55821cac5da58	red	0	5	0	0	0	0	0	0	0	0	0	0	5	0	0	0	0	0	0	0
cn	55821cac5da58	turquoise	0	0	0	5	0	0	0	0	0	0	0	0	0	0	0	0	0	0	0	0
cn	55821cac5da58	white	0	0	0	0	0	0	0	0	0	0	0	0	0	0	0	0	0	5	5	0
cn	55821cac5da58	yellow	0	0	0	0	0	0	0	0	0	0	0	0	0	0	5	0	0	0	0	0
cn	55a73e29516bd	black	0	0	0	0	0	0	0	4	5	0	0	0	0	0	0	0	0	0	5	0
cn	55a73e29516bd	blue	0	0	0	0	0	0	0	0	0	0	0	0	0	0	0	0	0	4	0	0
cn	55a73e29516bd	brown	0	0	0	0	0	0	3	0	0	0	0	0	0	0	0	0	4	0	0	4
cn	55a73e29516bd	green	0	0	0	5	5	0	0	0	0	0	0	0	0	0	0	0	0	0	0	0
cn	55a73e29516bd	grey	0	0	0	0	0	0	5	0	0	0	0	0	0	0	0	0	0	0	5	0
cn	55a73e29516bd	orange	0	0	0	0	0	0	0	0	0	0	0	0	0	0	5	0	0	0	0	0
cn	55a73e29516bd	pink	0	5	0	0	0	0	0	0	0	0	0	0	0	5	0	0	0	0	0	0
cn	55a73e29516bd	purple	0	0	0	0	4	0	0	0	0	0	0	0	0	0	0	0	0	0	0	5
cn	55a73e29516bd	red	0	0	5	0	0	0	0	0	0	0	0	0	5	0	0	0	0	0	0	0
cn	55a73e29516bd	turquoise	0	0	4	0	0	0	0	0	0	0	0	0	0	0	0	0	3	0	0	0
cn	55a73e29516bd	white	0	0	0	0	0	0	0	0	0	0	0	0	0	0	0	0	0	0	5	0
cn	55a73e29516bd	yellow	0	0	0	0	0	5	0	0	0	0	0	0	0	0	0	4	0	0	0	0
cn	55a86d07b4836	black	0	0	0	0	0	0	0	0	0	0	0	0	0	0	0	0	0	0	5	0
cn	55a86d07b4836	blue	0	0	0	0	0	0	0	0	0	0	0	0	0	0	0	5	0	0	0	0
cn	55a86d07b4836	brown	0	0	0	0	0	0	0	0	0	5	0	0	0	0	0	0	0	0	0	0
cn	55a86d07b4836	green	0	0	0	0	0	5	0	0	0	0	0	0	0	0	0	0	0	0	0	0
cn	55a86d07b4836	grey	0	0	0	0	0	0	5	0	0	0	0	0	0	0	0	0	0	0	0	0
cn	55a86d07b4836	orange	4	0	0	0	0	0	0	0	0	0	0	0	0	0	0	0	0	0	0	0
cn	55a86d07b4836	pink	0	0	0	0	0	0	0	0	0	0	0	0	0	0	3	0	0	0	0	0
cn	55a86d07b4836	purple	0	0	0	5	0	0	0	0	0	0	0	0	0	0	0	0	0	0	0	0
cn	55a86d07b4836	red	0	0	5	0	0	0	0	0	0	0	0	0	0	0	0	0	0	0	0	0
cn	55a86d07b4836	turquoise	0	0	0	0	0	0	0	0	0	0	0	0	0	0	0	0	0	4	0	0
cn	55a86d07b4836	white	0	0	0	0	0	0	4	0	0	0	0	0	0	0	0	0	0	0	0	0
cn	55a86d07b4836	yellow	0	0	0	0	0	0	0	0	0	5	0	0	0	0	0	0	0	0	0	0
cn	55dfadf23dea4	black	0	0	0	0	0	0	0	0	0	0	0	0	0	0	0	4	0	0	0	0
cn	55dfadf23dea4	blue	0	0	0	0	0	0	0	0	0	0	0	0	0	0	0	0	0	0	4	0
cn	55dfadf23dea4	brown	0	0	0	0	0	0	0	5	0	0	0	0	0	0	0	0	0	0	0	0
cn	55dfadf23dea4	green	0	0	0	0	0	0	0	0	0	0	0	5	0	0	0	0	0	0	0	0
cn	55dfadf23dea4	grey	0	0	0	0	0	0	0	0	0	5	0	0	0	0	0	0	0	0	0	0
cn	55dfadf23dea4	orange	0	0	0	0	0	0	0	0	0	0	0	0	5	0	0	0	0	0	0	0
cn	55dfadf23dea4	pink	0	0	0	0	0	0	0	0	0	0	0	0	0	4	0	0	0	0	0	0
cn	55dfadf23dea4	purple	0	0	0	0	0	0	0	0	0	0	0	0	0	0	0	0	0	0	1	0
cn	55dfadf23dea4	red	0	0	0	0	0	0	0	0	0	0	0	0	0	5	0	0	0	0	0	0
cn	55dfadf23dea4	turquoise	0	0	0	0	0	0	5	0	0	0	0	0	0	0	0	0	0	0	0	0
cn	55dfadf23dea4	white	0	0	0	0	0	0	0	0	0	0	0	0	0	5	0	0	0	0	0	0
cn	55dfadf23dea4	yellow	0	0	0	0	0	0	0	0	0	0	0	0	0	0	0	5	0	0	0	0
cn	55dfc91e61913	black	0	0	0	0	0	0	0	0	0	0	0	0	0	0	0	0	5	0	0	0
cn	55dfc91e61913	blue	0	0	0	0	0	5	0	0	0	0	0	0	0	0	0	0	0	0	0	0
cn	55dfc91e61913	brown	0	0	0	0	0	5	0	0	0	0	0	0	0	0	0	0	0	0	0	0
cn	55dfc91e61913	green	0	0	0	0	0	0	0	0	0	0	0	0	0	0	0	0	0	0	0	0
cn	55dfc91e61913	grey	0	0	0	0	0	0	4	0	0	0	0	0	0	0	0	0	0	0	0	0
cn	55dfc91e61913	orange	0	0	0	0	0	0	0	0	0	0	0	0	0	0	5	0	0	0	0	0
cn	55dfc91e61913	pink	0	0	0	0	0	0	0	0	0	0	0	0	0	3	0	0	0	0	0	0
cn	55dfc91e61913	purple	0	0	0	0	0	4	0	0	0	0	0	0	0	0	0	0	0	0	0	0
cn	55dfc91e61913	red	0	5	0	0	0	0	0	0	0	0	0	0	0	0	0	0	0	0	0	0
cn	55dfc91e61913	turquoise	0	0	0	0	0	0	0	0	0	0	0	0	0	0	0	0	0	0	0	0
cn	55dfc91e61913	white	0	0	0	0	0	0	0	0	0	0	0	0	0	0	0	0	0	3	0	0
cn	55dfc91e61913	yellow	0	0	0	0	0	0	0	0	0	0	0	0	4	0	0	0	0	0	0	0
cn	55e03dbdd12d9	black	0	0	0	0	0	0	0	3	3	0	0	0	0	0	0	0	0	0	0	0
cn	55e03dbdd12d9	blue	0	3	0	0	0	0	0	0	0	0	0	0	4	0	0	0	0	0	0	0
cn	55e03dbdd12d9	brown	0	0	0	0	0	0	0	0	0	0	0	0	0	0	0	0	0	0	0	0
cn	55e03dbdd12d9	green	0	0	0	0	0	0	0	0	0	0	0	5	0	0	0	0	0	0	0	0
cn	55e03dbdd12d9	grey	0	0	0	0	0	0	0	0	0	0	0	0	0	0	0	0	0	0	0	0
cn	55e03dbdd12d9	orange	0	2	0	0	0	0	0	0	0	0	0	0	0	0	3	0	0	0	0	0
cn	55e03dbdd12d9	pink	0	0	0	0	0	2	0	0	0	0	0	4	0	0	4	0	0	0	0	0
cn	55e03dbdd12d9	purple	0	0	0	0	0	0	0	0	0	0	0	0	0	0	0	0	0	0	0	0
cn	55e03dbdd12d9	red	0	0	0	0	0	0	0	0	3	0	0	0	0	0	0	0	0	0	0	0
cn	55e03dbdd12d9	turquoise	0	0	0	0	0	3	0	0	0	0	0	0	0	0	0	0	0	0	0	0
cn	55e03dbdd12d9	white	0	0	0	0	0	0	0	0	0	0	0	0	0	0	0	0	0	0	0	0
cn	55e03dbdd12d9	yellow	0	0	0	0	0	0	0	0	0	0	0	0	0	0	0	0	0	0	0	0
cn	55f28f82146ae	black	0	0	0	0	0	0	0	0	0	0	0	0	0	0	0	0	0	0	0	0
cn	55f28f82146ae	blue	0	0	0	0	0	0	0	0	0	0	0	0	5	0	0	0	0	0	0	0
cn	55f28f82146ae	brown	0	0	0	0	0	0	0	0	0	0	0	0	0	0	0	0	0	0	0	0
cn	55f28f82146ae	green	0	5	0	0	0	5	0	0	0	0	0	5	5	0	5	5	0	0	0	0
cn	55f28f82146ae	grey	0	0	0	0	0	3	5	4	0	0	0	0	0	0	0	0	0	0	0	0
cn	55f28f82146ae	orange	0	0	5	0	0	0	0	0	0	0	5	0	0	0	0	0	0	5	0	0
cn	55f28f82146ae	pink	5	5	0	0	0	5	0	0	0	0	0	0	5	5	5	0	0	0	0	0
cn	55f28f82146ae	purple	5	5	0	0	0	5	0	0	0	0	0	5	5	5	5	0	0	0	0	0
cn	55f28f82146ae	red	0	5	5	0	0	0	0	0	0	0	5	0	5	5	5	5	0	0	0	0
cn	55f28f82146ae	turquoise	5	5	0	0	0	5	0	0	0	0	0	0	4	0	4	0	0	0	0	0
cn	55f28f82146ae	white	0	0	0	0	0	0	0	0	0	5	0	0	0	5	0	0	0	0	0	0
cn	55f28f82146ae	yellow	0	0	0	0	0	0	0	0	0	0	0	5	0	0	0	0	0	0	0	5
cn	566f98219d7f6	black	5	5	2	3	5	4	3	2	2	3	3	3	3	2	5	3	4	5	3	5
cn	566f98219d7f6	blue	2	3	1	2	2	2	3	2	2	2	3	1	1	2	2	1	3	3	3	1
cn	566f98219d7f6	brown	5	5	5	5	5	5	5	5	5	5	5	5	5	5	5	5	5	5	5	5
cn	566f98219d7f6	green	5	5	5	5	5	5	3	4	4	5	4	5	5	5	5	5	4	5	5	5
cn	566f98219d7f6	grey	1	1	2	2	4	1	5	5	4	3	4	1	1	1	1	1	3	2	4	4
cn	566f98219d7f6	orange	4	2	3	3	2	4	4	4	4	4	3	2	3	3	3	2	5	2	4	4
cn	566f98219d7f6	pink	5	3	1	1	1	4	1	1	1	1	1	3	4	5	4	2	1	3	1	1
cn	566f98219d7f6	purple	2	1	1	1	1	1	1	1	1	1	1	1	1	1	1	1	1	1	1	1
cn	566f98219d7f6	red	4	5	2	3	3	3	2	2	2	1	3	5	5	3	5	5	3	2	4	3
cn	566f98219d7f6	turquoise	3	5	3	4	3	4	3	4	3	3	3	4	3	4	4	4	3	4	5	5
cn	566f98219d7f6	white	5	5	5	5	5	5	5	5	5	5	5	5	5	5	5	5	5	5	5	5
cn	566f98219d7f6	yellow	4	4	3	2	2	3	4	3	2	3	3	2	4	3	4	3	4	3	3	2
cn	56bca7fe8fe2c	black	0	0	0	0	0	0	2	0	0	0	0	0	0	0	0	0	0	3	0	0
cn	56bca7fe8fe2c	blue	0	0	0	0	0	0	0	0	0	0	0	0	0	0	4	0	0	3	0	0
cn	56bca7fe8fe2c	brown	0	0	0	0	0	0	0	0	0	0	0	0	0	0	0	0	0	0	0	0
cn	56bca7fe8fe2c	green	3	0	0	0	0	3	0	0	0	0	0	3	0	4	5	0	0	0	0	0
cn	56bca7fe8fe2c	grey	0	0	0	0	0	0	0	0	0	0	0	0	0	0	0	0	0	0	0	0
cn	56bca7fe8fe2c	orange	0	0	0	0	0	3	0	0	0	0	0	5	0	0	4	0	0	0	0	0
cn	56bca7fe8fe2c	pink	5	0	0	0	0	4	0	0	0	0	0	0	0	3	4	0	0	5	0	0
cn	56bca7fe8fe2c	purple	0	4	0	0	0	0	0	0	0	0	0	3	0	0	3	0	0	0	0	0
cn	56bca7fe8fe2c	red	0	5	0	0	0	0	0	0	0	0	0	0	3	0	3	0	0	0	0	0
cn	56bca7fe8fe2c	turquoise	0	0	0	2	0	3	0	0	0	0	0	0	0	0	0	0	0	0	0	0
cn	56bca7fe8fe2c	white	0	0	0	0	0	0	0	0	0	0	0	0	0	0	0	0	0	0	0	0
cn	56bca7fe8fe2c	yellow	0	0	0	0	0	3	0	0	0	0	0	0	0	0	4	0	0	0	0	0
cn	56bdbc02e70fc	black	0	0	0	0	0	0	0	0	3	0	0	0	0	0	0	0	0	0	0	0
cn	56bdbc02e70fc	blue	0	0	0	0	0	3	0	0	0	0	0	0	0	0	0	0	0	0	0	0
cn	56bdbc02e70fc	brown	0	0	0	0	0	0	0	0	0	0	0	0	0	0	0	0	0	3	0	0
cn	56bdbc02e70fc	green	0	0	0	0	0	0	0	0	0	0	0	0	0	3	0	0	0	0	0	0
cn	56bdbc02e70fc	grey	0	0	0	0	0	0	3	0	0	0	0	0	0	0	0	0	0	0	0	0
cn	56bdbc02e70fc	orange	0	0	0	0	0	0	0	0	0	0	0	0	3	0	0	0	0	0	0	0
cn	56bdbc02e70fc	pink	0	3	0	0	0	0	0	0	0	0	0	0	0	0	0	0	0	0	0	0
cn	56bdbc02e70fc	purple	0	0	0	0	0	0	0	0	0	0	0	0	0	0	0	3	0	0	0	0
cn	56bdbc02e70fc	red	0	0	0	0	0	0	0	0	0	0	0	0	0	0	3	0	0	0	0	0
cn	56bdbc02e70fc	turquoise	3	0	0	0	0	0	0	0	0	0	0	0	0	0	0	0	0	0	0	0
cn	56bdbc02e70fc	white	0	0	0	3	0	0	0	0	0	0	0	0	0	0	0	4	0	0	0	0
cn	56bdbc02e70fc	yellow	0	0	0	0	0	0	0	0	0	0	0	0	0	0	0	0	0	0	0	3
cn	56bdbfe03495b	black	0	0	0	0	0	0	0	0	0	0	0	4	0	0	0	0	0	0	0	0
cn	56bdbfe03495b	blue	0	0	0	0	0	0	3	0	0	0	0	0	0	0	0	0	0	0	0	0
cn	56bdbfe03495b	brown	0	0	0	0	0	0	0	0	0	0	0	0	0	0	0	0	0	0	0	0
cn	56bdbfe03495b	green	4	4	0	0	0	0	0	0	0	0	0	0	5	0	5	0	0	0	0	0
cn	56bdbfe03495b	grey	0	0	4	0	0	0	0	5	0	0	0	0	0	0	0	0	0	0	0	0
cn	56bdbfe03495b	orange	0	0	0	0	0	0	0	0	0	0	0	0	0	0	0	0	0	0	0	0
cn	56bdbfe03495b	pink	0	0	0	0	0	0	0	0	0	0	0	5	0	0	0	0	0	0	0	0
cn	56bdbfe03495b	purple	0	0	0	0	0	0	0	0	0	0	0	0	0	0	0	0	1	0	0	0
cn	56bdbfe03495b	red	0	5	0	0	0	0	0	0	0	0	0	5	0	0	0	0	0	0	0	0
cn	56bdbfe03495b	turquoise	0	0	0	0	3	0	0	0	0	0	0	0	0	0	0	0	0	0	0	0
cn	56bdbfe03495b	white	0	0	0	0	0	0	0	0	0	0	0	0	0	4	0	0	0	0	0	0
cn	56bdbfe03495b	yellow	4	0	0	0	0	0	0	0	0	0	0	0	0	0	0	0	0	0	0	0
cn	56bdbfef6ea6b	black	0	0	0	0	0	0	0	0	3	0	0	0	0	0	0	0	0	0	0	0
cn	56bdbfef6ea6b	blue	0	0	0	0	0	0	0	0	0	0	0	0	0	0	0	0	0	0	3	0
cn	56bdbfef6ea6b	brown	0	0	0	0	3	0	0	0	0	0	0	0	0	0	0	0	0	0	0	0
cn	56bdbfef6ea6b	green	0	0	0	0	0	3	0	0	0	0	0	0	0	0	0	0	0	0	0	0
cn	56bdbfef6ea6b	grey	0	0	0	0	0	0	0	3	0	0	0	0	0	0	0	0	0	0	0	0
cn	56bdbfef6ea6b	orange	0	3	0	0	0	0	0	0	0	0	0	0	0	0	0	0	0	0	0	0
cn	56bdbfef6ea6b	pink	0	0	0	0	0	0	0	0	0	0	0	3	0	0	0	0	0	0	0	0
cn	56bdbfef6ea6b	purple	3	0	0	0	0	0	0	0	0	0	0	0	0	0	3	0	0	0	0	0
cn	56bdbfef6ea6b	red	0	0	0	0	0	0	0	0	0	0	0	0	0	3	0	0	0	0	0	0
cn	56bdbfef6ea6b	turquoise	0	0	0	0	0	0	0	0	0	0	0	0	0	0	0	0	0	0	0	0
cn	56bdbfef6ea6b	white	0	0	0	0	0	0	0	0	0	0	0	0	0	0	0	0	0	0	3	0
cn	56bdbfef6ea6b	yellow	0	3	0	0	0	0	0	0	0	0	0	0	0	0	0	0	0	0	0	0
cn	56c5cad2085aa	black	0	0	3	0	3	0	3	3	3	3	3	0	0	0	0	3	3	0	0	3
cn	56c5cad2085aa	blue	0	0	0	0	0	0	0	0	0	0	0	0	0	0	0	0	0	0	0	0
cn	56c5cad2085aa	brown	0	0	0	0	0	0	0	0	0	3	0	0	0	0	0	0	3	0	0	0
cn	56c5cad2085aa	green	0	5	0	3	0	0	0	0	0	0	0	0	3	0	3	0	0	0	0	0
cn	56c5cad2085aa	grey	0	0	3	3	0	0	5	3	3	3	3	0	0	0	0	0	3	0	3	3
cn	56c5cad2085aa	orange	3	0	0	0	0	4	0	0	0	0	0	3	5	0	0	0	0	0	0	0
cn	56c5cad2085aa	pink	0	0	0	0	0	3	0	0	0	0	0	3	0	3	0	0	0	3	0	0
cn	56c5cad2085aa	purple	0	0	0	0	0	0	0	0	0	0	0	0	0	3	0	0	3	0	0	0
cn	56c5cad2085aa	red	5	5	0	0	0	5	0	0	0	0	0	0	5	5	5	3	0	0	0	0
cn	56c5cad2085aa	turquoise	0	0	0	0	0	0	0	5	3	0	0	0	0	0	0	0	3	0	0	0
cn	56c5cad2085aa	white	0	0	3	5	3	0	3	0	0	3	3	0	0	0	0	0	0	0	3	0
cn	56c5cad2085aa	yellow	0	3	0	0	0	3	0	0	0	0	0	5	3	5	3	3	0	0	0	0
cn	56c5cf487b920	black	0	0	0	0	0	0	0	0	0	0	0	0	0	0	0	0	0	0	0	0
cn	56c5cf487b920	blue	4	0	0	0	0	0	0	0	0	0	0	0	0	2	3	0	0	0	0	0
cn	56c5cf487b920	brown	0	0	0	0	0	0	0	0	0	0	0	0	0	0	0	0	0	0	0	0
cn	56c5cf487b920	green	5	0	0	0	0	0	0	0	0	0	0	5	0	0	0	0	0	0	0	0
cn	56c5cf487b920	grey	0	0	0	0	0	0	0	0	2	0	0	0	0	0	0	0	0	0	0	0
cn	56c5cf487b920	orange	0	0	0	0	0	0	0	0	0	0	0	0	0	0	0	4	0	0	0	0
cn	56c5cf487b920	pink	3	0	0	0	0	0	0	0	0	0	0	0	0	0	0	0	0	0	0	0
cn	56c5cf487b920	purple	0	0	0	0	0	0	0	0	0	0	0	0	0	0	0	4	0	0	0	0
cn	56c5cf487b920	red	0	0	0	0	0	0	0	0	0	0	0	0	4	0	0	0	0	0	0	0
cn	56c5cf487b920	turquoise	0	0	0	0	0	0	0	0	0	0	0	4	0	5	0	0	0	0	0	0
cn	56c5cf487b920	white	0	0	0	0	0	0	0	0	0	0	0	0	0	0	0	0	5	0	0	0
cn	56c5cf487b920	yellow	3	0	0	0	0	0	0	0	0	0	0	0	4	0	0	0	0	0	0	0
cn	56c69589443ab	black	0	0	0	0	0	0	0	0	0	0	0	0	0	0	0	0	0	0	0	0
cn	56c69589443ab	blue	0	0	0	0	0	0	0	0	0	0	0	0	0	0	5	0	0	0	0	0
cn	56c69589443ab	brown	0	0	0	0	0	0	0	0	0	0	0	0	0	0	0	0	0	0	0	0
cn	56c69589443ab	green	0	0	0	0	0	0	0	0	0	0	0	0	5	0	0	0	0	0	0	0
cn	56c69589443ab	grey	0	0	0	0	0	0	0	0	0	0	0	0	0	0	0	0	0	0	0	0
cn	56c69589443ab	orange	0	0	0	0	0	3	0	0	0	0	0	0	0	0	0	0	0	0	0	0
cn	56c69589443ab	pink	0	0	0	0	0	0	0	0	0	0	0	0	3	0	0	0	0	0	0	0
cn	56c69589443ab	purple	0	0	0	0	0	3	0	0	0	0	0	0	0	0	0	0	0	0	0	0
cn	56c69589443ab	red	0	4	0	0	0	0	0	0	0	0	0	0	0	0	0	0	0	0	0	0
cn	56c69589443ab	turquoise	0	0	0	0	0	0	0	0	0	0	0	4	0	0	0	0	0	0	0	0
cn	56c69589443ab	white	0	0	0	0	0	0	0	0	0	0	0	0	0	0	0	0	0	4	0	0
cn	56c69589443ab	yellow	4	0	0	0	0	0	0	0	0	0	0	0	0	0	0	0	0	0	0	0
cn	56d25c3d1b9ee	black	0	0	0	0	0	0	0	0	0	0	0	0	0	0	0	0	0	0	5	0
cn	56d25c3d1b9ee	blue	0	5	0	0	0	5	0	0	0	0	0	0	0	0	0	0	0	0	0	0
cn	56d25c3d1b9ee	brown	0	0	0	0	5	0	0	0	0	0	0	0	0	0	0	0	0	0	0	0
cn	56d25c3d1b9ee	green	5	0	0	0	0	5	0	0	0	0	0	0	0	0	0	0	0	0	0	0
cn	56d25c3d1b9ee	grey	0	0	0	0	0	0	5	0	0	0	0	0	0	0	0	0	0	0	0	0
cn	56d25c3d1b9ee	orange	5	0	0	0	0	0	0	0	0	0	0	0	0	0	0	0	0	0	0	0
cn	56d25c3d1b9ee	pink	0	0	0	0	0	0	0	0	0	0	0	0	5	0	5	0	0	0	0	0
cn	56d25c3d1b9ee	purple	5	0	0	0	0	0	0	0	0	0	0	0	0	0	0	0	0	0	0	0
cn	56d25c3d1b9ee	red	0	5	0	0	0	0	0	0	0	0	0	0	5	0	5	0	0	0	0	0
cn	56d25c3d1b9ee	turquoise	0	0	0	0	0	0	0	0	0	0	0	0	0	0	0	0	0	0	0	0
cn	56d25c3d1b9ee	white	0	0	0	0	0	5	0	0	0	0	0	0	0	0	0	0	0	0	0	0
cn	56d25c3d1b9ee	yellow	5	0	0	0	0	0	0	0	0	0	0	0	0	0	0	0	0	0	0	0
cn	56d25d9a3d9ac	black	0	0	0	0	0	0	3	0	3	0	0	0	0	0	0	0	0	0	5	0
cn	56d25d9a3d9ac	blue	4	0	0	0	0	0	0	0	0	0	0	0	4	0	0	0	0	0	0	0
cn	56d25d9a3d9ac	brown	0	0	0	0	0	0	0	0	0	0	0	0	0	0	0	0	0	0	0	0
cn	56d25d9a3d9ac	green	5	0	0	0	0	0	0	0	0	0	0	0	0	0	5	0	0	0	0	0
cn	56d25d9a3d9ac	grey	0	0	0	0	0	0	0	0	0	0	0	0	0	0	0	0	0	0	0	0
cn	56d25d9a3d9ac	orange	3	0	0	0	0	0	0	0	0	0	0	0	0	0	0	0	0	0	0	0
cn	56d25d9a3d9ac	pink	4	0	0	0	0	0	0	0	0	0	0	4	0	2	0	0	0	0	0	0
cn	56d25d9a3d9ac	purple	3	0	0	0	0	0	0	0	0	0	0	0	0	0	0	0	0	0	0	0
cn	56d25d9a3d9ac	red	5	5	0	0	0	0	0	0	0	0	0	0	4	4	5	5	0	0	0	0
cn	56d25d9a3d9ac	turquoise	0	0	0	0	0	0	0	0	0	0	0	0	0	0	0	0	0	0	0	0
cn	56d25d9a3d9ac	white	0	0	0	4	0	0	0	0	0	0	0	0	0	0	0	0	0	0	5	0
cn	56d25d9a3d9ac	yellow	3	0	0	0	0	3	0	0	0	0	0	0	0	0	0	0	0	0	0	0
cn	56d25e0e11621	black	0	0	0	0	0	0	5	0	0	5	0	0	0	0	0	0	2	0	5	0
cn	56d25e0e11621	blue	3	0	0	0	0	0	0	0	0	0	0	0	0	0	5	0	0	5	0	0
cn	56d25e0e11621	brown	0	0	0	0	0	0	4	0	0	0	0	0	0	0	0	0	1	0	5	0
cn	56d25e0e11621	green	0	0	0	0	0	0	0	0	0	0	0	0	0	0	2	0	0	5	0	0
cn	56d25e0e11621	grey	0	0	0	2	0	0	1	0	0	0	0	0	0	0	0	0	0	0	2	0
cn	56d25e0e11621	orange	5	0	0	0	0	5	0	0	0	0	0	0	0	1	0	0	0	0	0	0
cn	56d25e0e11621	pink	0	4	0	0	0	4	0	0	0	0	0	0	0	5	0	0	0	0	0	0
cn	56d25e0e11621	purple	0	0	0	0	0	0	1	0	0	0	0	0	0	0	0	0	5	0	0	3
cn	56d25e0e11621	red	5	5	0	0	0	5	0	0	0	0	0	5	5	0	5	0	0	0	0	0
cn	56d25e0e11621	turquoise	0	0	0	0	0	0	2	0	0	0	0	0	0	0	0	0	3	0	5	0
cn	56d25e0e11621	white	0	0	0	0	0	0	0	0	0	0	0	0	0	0	0	0	0	0	0	0
cn	56d25e0e11621	yellow	0	0	0	1	0	0	0	0	0	1	0	0	0	0	0	0	0	0	0	0
cn	56d25e7e4fd2b	black	0	0	1	4	0	0	0	5	4	0	2	0	0	0	0	0	4	0	5	0
cn	56d25e7e4fd2b	blue	5	5	0	0	0	3	0	0	0	0	0	4	0	5	5	5	0	0	0	0
cn	56d25e7e4fd2b	brown	0	0	3	4	0	0	4	4	5	0	2	0	0	0	0	0	0	0	5	0
cn	56d25e7e4fd2b	green	5	5	0	0	0	4	0	0	0	0	0	5	4	5	5	3	0	0	0	0
cn	56d25e7e4fd2b	grey	0	0	0	0	0	0	5	4	5	5	5	0	0	0	0	0	5	0	0	3
cn	56d25e7e4fd2b	orange	0	0	0	5	0	2	0	0	3	0	0	0	0	0	0	0	0	0	0	4
cn	56d25e7e4fd2b	pink	5	0	0	0	0	0	0	0	0	0	0	0	5	5	5	0	0	0	0	0
cn	56d25e7e4fd2b	purple	0	0	0	0	0	0	5	0	5	0	0	0	0	0	0	0	5	0	0	0
cn	56d25e7e4fd2b	red	5	5	0	0	0	0	0	0	0	0	0	5	5	5	5	5	0	0	0	0
cn	56d25e7e4fd2b	turquoise	0	0	4	0	0	0	0	4	5	0	5	0	0	0	0	0	5	0	5	0
cn	56d25e7e4fd2b	white	0	0	0	0	0	0	5	0	0	3	0	0	0	0	0	0	4	0	5	0
cn	56d25e7e4fd2b	yellow	4	5	0	5	0	4	0	0	0	0	0	0	0	5	3	0	0	0	0	0
cn	56d2628e19ef4	black	0	0	0	0	0	0	4	0	0	0	0	0	0	0	0	0	0	0	0	0
cn	56d2628e19ef4	blue	0	0	0	0	0	3	0	0	0	0	0	0	0	0	0	0	0	4	0	0
cn	56d2628e19ef4	brown	0	0	0	0	0	0	0	0	0	0	0	0	0	0	0	0	0	0	0	0
cn	56d2628e19ef4	green	0	5	0	0	0	0	0	0	0	0	0	0	0	0	0	0	0	0	0	0
cn	56d2628e19ef4	grey	0	0	0	0	0	0	4	0	0	0	0	0	0	0	0	0	0	0	4	0
cn	56d2628e19ef4	orange	4	0	0	0	0	0	0	0	0	0	0	0	0	0	0	0	0	0	0	0
cn	56d2628e19ef4	pink	0	0	0	0	0	0	0	0	0	0	0	0	4	0	4	0	0	0	0	0
cn	56d2628e19ef4	purple	0	0	0	0	0	0	0	0	0	0	0	0	0	0	3	0	0	0	0	0
cn	56d2628e19ef4	red	0	0	0	0	0	0	0	0	0	0	0	0	0	3	3	0	0	0	0	0
cn	56d2628e19ef4	turquoise	0	0	0	0	0	0	4	0	0	0	0	0	0	0	0	0	0	0	4	0
cn	56d2628e19ef4	white	0	0	0	0	0	5	0	0	0	0	0	0	0	0	0	0	0	0	0	0
cn	56d2628e19ef4	yellow	5	0	0	0	0	0	0	0	0	0	0	0	0	0	0	0	0	0	0	0
cn	56d263467dc7f	black	0	0	3	0	0	0	3	4	4	0	3	0	0	0	0	0	0	0	0	0
cn	56d263467dc7f	blue	2	3	0	0	0	0	0	0	0	0	0	5	4	0	3	0	0	0	0	0
cn	56d263467dc7f	brown	0	0	0	0	0	0	0	0	0	0	0	0	0	0	0	0	0	0	0	0
cn	56d263467dc7f	green	5	5	0	0	0	3	0	0	0	0	0	5	4	5	4	0	0	0	0	0
cn	56d263467dc7f	grey	0	0	0	0	2	0	3	3	2	0	1	0	0	0	0	0	0	0	0	0
cn	56d263467dc7f	orange	0	0	0	3	0	0	0	0	0	0	0	0	0	2	0	0	0	0	0	0
cn	56d263467dc7f	pink	0	0	0	0	0	2	0	0	0	0	0	1	0	1	0	0	0	0	0	0
cn	56d263467dc7f	purple	0	0	0	0	0	0	0	0	0	2	0	0	0	0	0	0	3	0	0	0
cn	56d263467dc7f	red	2	4	0	0	0	3	0	0	0	0	0	3	5	5	4	2	0	0	0	0
cn	56d263467dc7f	turquoise	0	0	0	0	0	0	0	0	0	0	0	0	0	0	0	0	0	0	0	0
cn	56d263467dc7f	white	0	0	0	0	0	0	0	0	0	0	0	0	0	0	0	0	0	4	0	0
cn	56d263467dc7f	yellow	0	0	0	0	1	0	2	0	0	0	0	0	0	0	0	0	0	0	0	3
cn	56d26423a0a1a	black	0	0	0	0	0	0	3	5	5	0	5	0	0	0	0	0	0	0	1	0
cn	56d26423a0a1a	blue	0	0	0	0	0	0	0	0	0	4	0	3	0	0	0	0	0	4	0	0
cn	56d26423a0a1a	brown	0	0	0	0	1	5	2	0	0	3	0	0	0	0	0	4	4	0	4	0
cn	56d26423a0a1a	green	3	4	0	1	0	0	0	0	0	0	0	5	0	5	4	0	0	3	0	0
cn	56d26423a0a1a	grey	0	0	0	4	3	0	5	0	0	0	0	0	0	0	0	0	3	5	0	4
cn	56d26423a0a1a	orange	4	5	0	3	0	5	0	0	0	0	0	5	3	0	4	4	0	0	0	0
cn	56d26423a0a1a	pink	4	5	0	3	0	3	0	0	0	0	0	0	0	5	5	3	0	0	0	0
cn	56d26423a0a1a	purple	0	0	0	0	0	0	2	0	1	4	0	2	0	0	0	0	3	0	0	0
cn	56d26423a0a1a	red	3	3	0	0	0	0	0	0	0	0	0	5	5	0	4	0	0	0	0	0
cn	56d26423a0a1a	turquoise	0	0	0	0	4	0	5	3	0	3	0	0	0	0	0	0	4	0	3	1
cn	56d26423a0a1a	white	0	0	0	0	1	0	5	0	0	4	0	0	0	0	0	0	2	3	4	0
cn	56d26423a0a1a	yellow	5	4	0	3	0	0	0	0	0	0	0	5	0	0	5	0	0	0	0	0
cn	56d2696ac8015	black	0	0	0	0	0	0	0	0	0	4	0	0	0	0	0	0	0	0	5	0
cn	56d2696ac8015	blue	5	0	0	4	0	5	0	0	0	0	0	0	0	0	0	0	0	0	0	0
cn	56d2696ac8015	brown	0	0	0	0	0	4	0	0	0	0	0	0	0	0	0	0	0	0	0	0
cn	56d2696ac8015	green	3	0	0	0	0	5	0	0	0	0	0	0	0	0	0	0	0	0	0	0
cn	56d2696ac8015	grey	0	0	0	0	5	0	0	0	0	0	0	0	0	0	0	0	0	0	0	0
cn	56d2696ac8015	orange	0	0	0	4	0	0	0	0	0	0	0	0	0	0	0	0	0	0	0	0
cn	56d2696ac8015	pink	0	0	0	0	0	5	0	0	0	0	0	0	0	0	0	0	0	0	0	0
cn	56d2696ac8015	purple	0	0	0	0	0	0	0	0	0	0	0	0	0	0	5	0	0	0	0	0
cn	56d2696ac8015	red	5	0	0	0	0	5	0	0	0	0	0	0	0	0	0	0	0	0	0	0
cn	56d2696ac8015	turquoise	0	0	0	0	0	0	0	0	0	0	0	0	5	0	0	0	0	0	0	0
cn	56d2696ac8015	white	3	0	0	0	5	5	4	0	0	0	0	0	0	0	0	0	0	0	0	0
cn	56d2696ac8015	yellow	5	0	0	0	0	0	0	0	0	0	0	0	0	0	0	0	0	0	0	0
cn	56d26a2d9c997	black	3	0	0	0	2	0	0	0	5	0	0	4	0	0	0	0	0	0	4	0
cn	56d26a2d9c997	blue	5	0	0	0	0	0	0	0	0	0	0	5	5	5	5	0	0	0	0	0
cn	56d26a2d9c997	brown	0	0	0	0	0	5	0	0	0	0	0	5	0	4	0	0	0	0	0	0
cn	56d26a2d9c997	green	0	0	0	0	0	0	0	0	0	0	0	5	5	0	5	0	0	0	0	0
cn	56d26a2d9c997	grey	0	0	0	0	4	0	0	0	0	0	0	5	0	0	0	0	0	0	0	0
cn	56d26a2d9c997	orange	0	0	0	0	0	0	0	0	0	0	0	5	0	0	0	0	0	0	0	0
cn	56d26a2d9c997	pink	4	0	0	0	0	0	0	0	0	0	0	5	0	5	5	0	0	0	0	0
cn	56d26a2d9c997	purple	4	4	0	0	0	0	0	0	0	0	0	5	5	4	5	0	0	0	0	0
cn	56d26a2d9c997	red	5	5	0	0	0	5	0	0	1	0	0	5	5	5	5	5	0	0	1	0
cn	56d26a2d9c997	turquoise	4	0	0	0	0	0	0	0	0	0	0	5	5	0	0	0	0	0	0	0
cn	56d26a2d9c997	white	0	0	0	0	0	0	3	3	5	0	3	4	0	0	0	0	0	0	0	0
cn	56d26a2d9c997	yellow	2	4	0	0	0	3	0	0	0	0	0	0	0	4	4	0	0	0	0	0
cn	56d26cc2e4f90	black	0	0	0	0	0	0	0	0	0	0	0	0	0	0	0	0	0	0	0	0
cn	56d26cc2e4f90	blue	0	0	0	0	0	4	1	0	0	2	0	0	0	0	0	0	1	4	2	0
cn	56d26cc2e4f90	brown	0	0	2	0	0	0	3	1	0	0	0	0	0	0	0	0	3	0	3	0
cn	56d26cc2e4f90	green	4	0	0	0	0	0	0	0	0	0	0	4	4	4	4	0	0	0	0	0
cn	56d26cc2e4f90	grey	0	0	0	0	2	0	1	1	0	0	0	0	0	0	0	0	0	0	0	0
cn	56d26cc2e4f90	orange	3	0	0	0	0	0	0	0	0	0	0	0	3	3	3	3	0	0	0	0
cn	56d26cc2e4f90	pink	4	4	0	0	0	4	0	0	0	0	0	4	0	4	4	5	0	0	0	0
cn	56d26cc2e4f90	purple	2	0	0	0	0	2	0	0	0	0	0	0	0	2	2	2	0	0	0	0
cn	56d26cc2e4f90	red	5	5	0	0	0	5	0	0	0	0	0	5	5	5	5	5	0	0	0	0
cn	56d26cc2e4f90	turquoise	0	0	0	0	1	0	1	0	0	0	0	0	0	0	0	0	0	1	0	0
cn	56d26cc2e4f90	white	3	0	0	0	0	0	4	0	0	3	0	0	4	4	0	0	0	4	3	0
cn	56d26cc2e4f90	yellow	0	0	0	0	3	0	0	0	0	0	0	0	0	0	0	0	0	0	0	0
cn	56d29fe9a9862	black	0	0	5	0	0	0	0	5	5	0	4	0	0	0	0	0	0	0	0	0
cn	56d29fe9a9862	blue	0	0	0	0	4	0	3	0	0	5	0	0	0	0	0	0	4	0	0	3
cn	56d29fe9a9862	brown	0	0	4	0	0	0	0	4	0	4	4	0	0	0	0	0	0	0	0	0
cn	56d29fe9a9862	green	0	0	0	0	0	0	3	0	0	0	0	0	0	0	0	0	0	4	2	1
cn	56d29fe9a9862	grey	0	0	0	0	5	0	0	4	0	0	0	0	0	0	0	0	4	0	4	4
cn	56d29fe9a9862	orange	3	3	0	0	0	0	3	0	0	3	0	0	3	0	3	0	0	4	0	0
cn	56d29fe9a9862	pink	4	5	0	0	0	4	0	0	0	0	0	0	4	4	5	0	0	0	0	0
cn	56d29fe9a9862	purple	0	0	4	0	0	0	0	4	0	0	4	0	0	0	0	0	0	0	0	0
cn	56d29fe9a9862	red	5	5	0	3	0	5	0	0	0	0	0	5	5	5	5	5	0	0	0	0
cn	56d29fe9a9862	turquoise	0	0	0	0	4	0	4	0	0	5	0	0	0	0	0	0	4	0	4	5
cn	56d29fe9a9862	white	0	0	0	0	0	0	0	0	0	0	0	0	0	0	0	0	0	5	0	0
cn	56d29fe9a9862	yellow	4	4	0	3	0	4	0	0	0	0	0	4	5	4	5	4	0	5	0	0
cn	56d2a02792c40	black	4	0	0	0	0	0	0	0	0	0	0	4	0	0	0	0	0	0	0	0
cn	56d2a02792c40	blue	0	0	0	0	0	0	0	0	0	0	0	5	0	5	0	0	0	0	0	0
cn	56d2a02792c40	brown	5	0	0	0	0	0	0	0	0	0	0	5	0	0	0	0	0	0	0	0
cn	56d2a02792c40	green	0	5	0	0	0	0	0	0	0	0	0	0	0	5	5	0	0	0	0	0
cn	56d2a02792c40	grey	0	0	0	0	1	0	0	1	0	0	0	0	0	0	0	0	0	0	0	0
cn	56d2a02792c40	orange	4	0	0	0	0	0	0	0	0	0	0	5	0	0	0	0	0	0	0	0
cn	56d2a02792c40	pink	0	0	0	0	0	0	0	0	0	0	0	0	4	4	0	0	0	0	0	0
cn	56d2a02792c40	purple	0	0	0	0	0	0	0	0	0	0	0	0	0	4	4	0	0	0	0	0
cn	56d2a02792c40	red	0	0	0	0	0	0	0	0	0	0	0	0	5	5	5	0	0	0	0	0
cn	56d2a02792c40	turquoise	4	5	0	0	0	0	0	0	0	0	0	5	0	0	5	0	0	0	0	0
cn	56d2a02792c40	white	0	0	0	0	0	0	0	0	0	0	0	0	0	5	4	0	0	0	0	0
cn	56d2a02792c40	yellow	5	5	0	0	0	0	0	0	0	0	0	0	0	0	5	0	0	0	0	0
cn	56d2a42ec62f9	black	0	0	0	0	0	0	0	0	0	0	0	0	0	0	0	5	0	3	5	0
cn	56d2a42ec62f9	blue	0	5	0	0	0	0	0	0	0	0	0	0	5	0	5	0	0	0	0	0
cn	56d2a42ec62f9	brown	0	0	0	0	0	0	0	0	0	0	0	0	0	0	0	0	0	0	0	0
cn	56d2a42ec62f9	green	5	5	0	0	0	0	0	0	0	0	0	0	4	0	5	0	0	0	0	0
cn	56d2a42ec62f9	grey	0	0	0	0	2	0	5	4	0	2	0	0	0	0	0	0	5	0	4	1
cn	56d2a42ec62f9	orange	1	4	0	3	0	4	0	0	0	0	0	5	0	0	2	2	0	0	0	0
cn	56d2a42ec62f9	pink	0	5	0	0	0	0	0	0	0	0	0	0	5	0	5	0	0	0	0	0
cn	56d2a42ec62f9	purple	5	0	0	0	0	3	0	0	0	0	0	4	0	0	0	5	0	0	0	0
cn	56d2a42ec62f9	red	0	5	0	0	0	0	0	0	0	0	0	0	5	5	5	4	0	0	0	0
cn	56d2a42ec62f9	turquoise	0	0	0	0	0	0	0	0	0	0	0	0	0	0	0	0	0	0	0	0
cn	56d2a42ec62f9	white	0	0	0	0	0	0	3	0	0	0	0	0	0	0	0	0	0	0	5	0
cn	56d2a42ec62f9	yellow	0	0	0	0	0	4	0	0	0	0	0	0	0	0	0	5	0	0	0	0
cn	56d2a8020d7e1	black	0	0	5	0	0	0	0	5	5	0	5	0	0	0	0	0	0	0	0	0
cn	56d2a8020d7e1	blue	0	0	0	0	0	0	0	0	0	0	0	0	0	0	0	0	0	0	0	0
cn	56d2a8020d7e1	brown	1	1	0	0	0	1	0	0	0	0	0	1	1	1	1	1	0	0	0	0
cn	56d2a8020d7e1	green	2	2	0	0	0	2	0	0	0	0	0	2	2	2	2	2	0	0	0	0
cn	56d2a8020d7e1	grey	0	0	5	0	0	0	4	5	0	0	5	0	0	0	0	0	0	0	0	0
cn	56d2a8020d7e1	orange	4	4	0	0	0	0	0	0	0	0	0	4	4	4	4	4	0	0	0	0
cn	56d2a8020d7e1	pink	4	4	0	0	0	4	0	0	0	0	0	4	4	4	4	0	0	0	0	0
cn	56d2a8020d7e1	purple	4	4	0	0	0	4	0	0	0	0	0	4	4	4	4	0	0	0	0	0
cn	56d2a8020d7e1	red	5	0	0	0	0	5	0	0	0	0	0	5	5	5	5	0	0	0	0	0
cn	56d2a8020d7e1	turquoise	0	0	0	0	0	0	5	5	0	0	5	0	0	0	0	0	0	0	0	0
cn	56d2a8020d7e1	white	0	0	0	0	0	0	0	0	0	0	0	3	0	0	0	0	0	0	0	0
cn	56d2a8020d7e1	yellow	5	0	0	0	0	0	0	0	0	0	0	0	0	5	0	0	0	0	0	0
cn	56d2aab361c53	black	0	0	0	0	3	0	2	0	0	0	0	3	0	0	0	0	3	0	3	3
cn	56d2aab361c53	blue	5	5	0	4	0	5	0	0	0	0	0	5	5	4	5	5	0	0	0	0
cn	56d2aab361c53	brown	0	0	0	0	0	0	0	0	0	0	0	0	0	0	0	0	0	0	0	0
cn	56d2aab361c53	green	3	3	0	4	2	3	0	0	0	0	0	2	4	0	4	0	0	0	0	0
cn	56d2aab361c53	grey	0	2	0	0	3	0	4	0	0	4	0	1	0	0	0	2	5	0	4	4
cn	56d2aab361c53	orange	4	4	0	3	0	4	0	0	0	0	0	4	4	3	4	3	0	0	0	0
cn	56d2aab361c53	pink	3	3	0	4	4	0	3	0	0	0	0	3	4	0	2	0	2	0	0	2
cn	56d2aab361c53	purple	3	4	0	3	0	3	0	0	0	0	0	4	4	4	3	4	0	0	0	0
cn	56d2aab361c53	red	5	5	0	5	0	5	0	0	0	0	0	5	5	4	5	5	0	0	0	0
cn	56d2aab361c53	turquoise	3	3	0	4	0	0	0	0	0	0	0	5	4	4	4	0	0	0	0	0
cn	56d2aab361c53	white	0	0	0	0	3	0	4	3	0	0	0	5	0	0	0	0	0	0	5	4
cn	56d2aab361c53	yellow	4	2	0	3	3	0	0	0	0	0	0	3	4	3	3	0	3	0	0	0
cn	56d2ab49009ab	black	0	0	0	4	0	0	4	0	0	0	0	0	0	0	0	0	0	0	3	0
cn	56d2ab49009ab	blue	4	4	0	0	0	0	0	0	0	0	0	5	0	5	5	5	0	0	0	0
cn	56d2ab49009ab	brown	0	4	0	0	0	0	0	0	0	0	0	0	0	0	0	0	0	0	0	0
cn	56d2ab49009ab	green	0	4	0	0	0	0	0	0	0	0	0	3	0	0	0	0	0	0	0	0
cn	56d2ab49009ab	grey	0	0	0	0	0	0	4	0	0	4	0	0	0	0	0	0	0	0	0	0
cn	56d2ab49009ab	orange	3	3	0	0	0	0	0	0	0	0	0	3	0	0	3	3	0	0	0	0
cn	56d2ab49009ab	pink	0	4	0	0	0	0	0	0	0	0	0	5	3	0	0	4	0	0	0	0
cn	56d2ab49009ab	purple	0	3	0	0	0	0	0	0	0	0	0	3	0	0	0	0	0	0	0	0
cn	56d2ab49009ab	red	4	4	0	0	0	5	0	0	0	0	0	5	5	4	5	4	0	0	0	0
cn	56d2ab49009ab	turquoise	0	0	0	0	0	3	0	0	0	0	0	4	0	4	0	3	0	0	0	0
cn	56d2ab49009ab	white	0	5	0	5	0	5	0	0	0	0	0	4	0	0	0	4	0	0	0	0
cn	56d2ab49009ab	yellow	3	3	0	0	0	4	4	0	0	0	0	4	0	0	0	0	0	0	0	0
cn	56d2ae6574ee1	black	0	0	0	3	0	0	0	0	0	0	0	0	0	0	0	0	0	0	0	0
cn	56d2ae6574ee1	blue	0	0	0	0	0	0	0	0	0	0	0	3	0	0	0	0	0	0	0	0
cn	56d2ae6574ee1	brown	0	0	0	0	0	0	0	0	0	0	0	0	0	0	0	0	0	0	0	0
cn	56d2ae6574ee1	green	0	0	0	0	0	0	0	0	0	0	0	0	0	0	0	0	0	3	0	0
cn	56d2ae6574ee1	grey	0	0	0	0	0	0	0	0	0	0	0	0	0	0	0	0	0	0	0	0
cn	56d2ae6574ee1	orange	0	0	0	0	0	0	0	0	0	0	0	3	0	0	0	0	0	0	0	0
cn	56d2ae6574ee1	pink	0	3	0	0	0	0	0	0	0	0	0	0	0	0	0	0	0	0	0	0
cn	56d2ae6574ee1	purple	0	0	0	0	0	0	0	0	0	0	0	0	0	0	0	0	0	0	0	0
cn	56d2ae6574ee1	red	0	0	0	0	0	0	0	0	0	0	0	0	5	0	0	0	0	0	0	0
cn	56d2ae6574ee1	turquoise	0	0	0	0	0	0	0	0	0	0	0	0	0	0	0	0	0	0	0	0
cn	56d2ae6574ee1	white	0	0	0	0	0	0	0	0	0	0	0	0	0	0	0	0	0	0	0	0
cn	56d2ae6574ee1	yellow	0	0	0	0	0	0	0	0	0	0	0	0	0	0	3	0	0	0	0	0
cn	56d2b0f131d72	black	0	0	5	0	0	0	4	5	5	0	5	0	0	0	0	0	0	0	5	0
cn	56d2b0f131d72	blue	5	4	0	0	0	3	0	0	0	0	0	5	4	5	5	0	0	0	0	0
cn	56d2b0f131d72	brown	3	5	0	3	0	4	0	0	0	0	0	0	5	1	5	5	0	0	0	0
cn	56d2b0f131d72	green	5	5	0	0	0	5	0	0	0	0	0	5	5	5	5	0	0	0	0	0
cn	56d2b0f131d72	grey	0	0	0	0	5	0	5	5	5	0	0	0	0	0	0	0	0	0	4	0
cn	56d2b0f131d72	orange	5	5	0	0	0	3	0	0	0	0	0	5	3	4	4	3	0	0	0	0
cn	56d2b0f131d72	pink	5	5	0	0	0	5	0	0	0	0	0	5	5	5	5	0	0	0	0	0
cn	56d2b0f131d72	purple	3	0	0	2	0	4	0	0	0	0	0	5	5	0	4	0	0	0	0	0
cn	56d2b0f131d72	red	5	5	0	0	0	5	0	0	0	0	0	5	5	5	5	0	0	0	0	0
cn	56d2b0f131d72	turquoise	5	5	0	0	0	5	0	0	0	0	0	4	5	4	5	0	0	0	0	0
cn	56d2b0f131d72	white	0	0	5	0	0	0	4	5	5	0	5	0	0	0	0	0	0	0	5	0
cn	56d2b0f131d72	yellow	5	5	0	0	0	5	0	0	0	0	0	5	5	5	5	0	0	0	0	0
cn	56d2b17bd5c02	black	0	0	5	0	0	0	5	5	5	0	5	0	0	0	0	0	5	0	5	0
cn	56d2b17bd5c02	blue	5	5	0	5	0	5	0	0	0	0	0	5	5	5	5	0	0	0	0	0
cn	56d2b17bd5c02	brown	0	0	0	0	5	0	5	5	0	5	0	0	0	0	0	0	5	0	4	0
cn	56d2b17bd5c02	green	5	5	0	0	0	5	0	0	0	0	0	5	5	5	5	5	0	0	0	0
cn	56d2b17bd5c02	grey	0	0	0	0	0	0	4	5	0	4	0	0	0	0	0	0	0	0	5	0
cn	56d2b17bd5c02	orange	0	0	0	0	5	0	0	0	0	5	0	0	0	0	0	0	5	0	4	5
cn	56d2b17bd5c02	pink	5	5	0	0	0	0	0	0	0	0	0	5	5	5	5	5	0	5	0	0
cn	56d2b17bd5c02	purple	0	0	0	5	0	0	5	5	5	5	5	0	0	0	0	0	5	0	0	0
cn	56d2b17bd5c02	red	5	5	0	0	0	5	0	0	0	0	0	5	5	5	5	5	0	5	0	0
cn	56d2b17bd5c02	turquoise	5	0	0	0	0	5	0	0	0	0	0	5	5	5	5	5	0	5	0	0
cn	56d2b17bd5c02	white	0	0	0	0	0	0	5	5	5	5	0	0	0	0	0	0	5	0	5	5
cn	56d2b17bd5c02	yellow	5	5	0	0	0	5	0	0	0	0	0	5	5	5	5	0	0	5	0	0
cn	56d2b2e8a8513	black	0	0	5	0	0	0	0	0	5	0	5	0	0	0	0	0	0	0	5	0
cn	56d2b2e8a8513	blue	5	4	0	0	0	5	0	0	0	0	0	4	0	0	0	0	0	0	0	0
cn	56d2b2e8a8513	brown	0	0	0	5	0	0	0	0	0	5	0	0	0	0	0	0	5	5	0	0
cn	56d2b2e8a8513	green	5	0	0	0	0	5	0	0	0	0	0	5	0	0	5	0	0	0	0	0
cn	56d2b2e8a8513	grey	0	0	0	0	5	0	5	5	0	0	0	0	0	0	0	0	5	0	0	0
cn	56d2b2e8a8513	orange	5	5	0	0	0	5	0	0	0	0	0	5	0	0	0	0	0	0	0	0
cn	56d2b2e8a8513	pink	5	4	0	0	0	0	0	0	0	0	0	0	0	4	5	0	0	0	0	0
cn	56d2b2e8a8513	purple	3	0	0	2	0	4	0	0	0	0	0	0	0	0	0	4	0	0	0	0
cn	56d2b2e8a8513	red	0	0	0	0	0	0	0	0	0	0	0	0	5	5	5	5	0	0	0	0
cn	56d2b2e8a8513	turquoise	3	0	0	4	0	3	0	0	0	0	0	0	0	0	0	0	0	4	0	0
cn	56d2b2e8a8513	white	5	0	0	0	0	0	0	0	0	0	0	5	0	4	0	0	0	4	0	0
cn	56d2b2e8a8513	yellow	0	5	0	0	0	5	0	0	0	0	0	0	5	0	5	0	0	0	0	0
de	55100740d094a	black	0	0	4	0	0	0	3	0	5	0	0	0	0	0	0	0	2	0	0	0
de	55100740d094a	blue	0	0	0	4	0	0	0	0	0	0	0	4	0	0	0	0	0	0	0	0
de	55100740d094a	brown	0	0	0	0	0	0	4	2	0	0	0	0	0	0	0	0	0	0	0	0
de	55100740d094a	green	0	0	0	0	0	4	0	0	0	0	0	0	0	0	0	0	0	4	0	0
de	55100740d094a	grey	0	0	0	0	2	0	5	0	0	0	0	0	0	0	0	0	0	0	0	0
de	55100740d094a	orange	0	0	0	0	0	0	0	0	0	0	0	0	0	0	0	0	0	0	0	0
de	55100740d094a	pink	0	0	0	0	0	4	0	0	0	0	0	0	2	0	0	0	0	4	0	0
de	55100740d094a	purple	1	4	0	0	0	0	0	0	0	0	0	0	0	0	0	0	0	0	0	0
de	55100740d094a	red	0	0	3	0	0	0	0	0	0	0	0	0	0	0	0	0	0	0	0	0
de	55100740d094a	turquoise	0	0	0	0	0	4	0	0	0	0	0	0	0	0	0	0	0	0	0	0
de	55100740d094a	white	0	0	0	0	0	0	0	0	0	0	0	0	0	0	0	0	0	5	0	0
de	55100740d094a	yellow	3	0	0	0	0	5	0	0	0	0	0	0	0	0	0	4	0	5	0	0
de	551958128fa27	black	0	0	0	0	4	0	0	0	0	4	4	0	0	0	0	0	0	0	5	0
de	551958128fa27	blue	0	0	0	4	0	0	0	0	0	4	0	0	0	0	0	0	4	0	0	0
de	551958128fa27	brown	0	0	0	0	4	0	0	4	0	0	0	0	0	0	0	0	0	0	0	0
de	551958128fa27	green	0	0	0	0	0	0	0	0	0	0	0	3	4	0	4	0	0	0	0	0
de	551958128fa27	grey	0	0	0	0	3	0	4	0	0	0	0	0	0	0	0	0	0	0	0	0
de	551958128fa27	orange	3	0	0	0	0	0	0	0	0	0	0	0	0	0	3	0	0	3	0	0
de	551958128fa27	pink	0	0	0	0	0	2	0	0	0	0	0	0	2	2	0	0	0	0	0	0
de	551958128fa27	purple	0	0	0	0	0	4	0	0	0	0	0	0	0	0	0	0	0	0	0	0
de	551958128fa27	red	0	0	4	0	0	0	0	0	0	0	0	0	0	4	0	4	0	0	0	0
de	551958128fa27	turquoise	0	0	0	0	0	0	0	0	0	0	0	0	0	0	3	4	0	0	0	0
de	551958128fa27	white	0	0	0	0	0	0	0	0	0	0	0	0	0	0	0	0	0	0	0	0
de	551958128fa27	yellow	0	0	0	0	0	4	0	0	0	0	0	0	4	0	0	0	0	0	0	0
de	552e17e016f01	black	3	3	1	0	0	4	0	0	0	0	1	0	0	0	4	4	0	0	0	0
de	552e17e016f01	blue	2	0	0	0	0	0	0	0	0	0	0	0	0	0	0	0	0	0	0	0
de	552e17e016f01	brown	0	0	0	0	0	0	0	4	0	0	0	0	0	0	0	0	2	0	0	0
de	552e17e016f01	green	0	0	0	0	0	3	0	0	0	0	0	0	0	3	2	0	0	0	0	0
de	552e17e016f01	grey	0	0	0	0	0	0	0	0	0	0	0	0	0	0	0	0	0	0	0	0
de	552e17e016f01	orange	0	2	0	0	0	0	0	0	0	0	0	0	0	0	2	0	0	2	0	0
de	552e17e016f01	pink	0	0	0	0	4	0	3	4	2	0	0	0	0	0	0	0	0	0	0	4
de	552e17e016f01	purple	0	0	0	4	0	0	0	0	0	0	0	0	5	3	5	3	0	0	2	0
de	552e17e016f01	red	0	0	0	0	0	3	0	0	0	0	0	0	5	4	5	0	0	0	0	1
de	552e17e016f01	turquoise	0	0	0	0	0	0	0	0	0	0	0	0	0	0	0	0	0	0	0	0
de	552e17e016f01	white	0	0	0	0	0	0	0	0	0	0	0	0	0	0	0	0	0	0	0	0
de	552e17e016f01	yellow	0	0	0	0	0	4	0	0	0	0	0	0	3	0	0	2	0	0	0	0
de	55436b7d57487	black	0	0	0	0	0	0	0	0	4	4	4	0	0	0	0	0	0	0	5	0
de	55436b7d57487	blue	0	0	0	0	0	0	0	0	0	0	0	0	0	0	4	4	0	3	0	0
de	55436b7d57487	brown	0	0	0	0	0	0	0	0	0	0	0	0	0	0	0	0	0	0	0	0
de	55436b7d57487	green	0	0	0	0	0	5	0	0	0	0	0	0	0	0	0	0	0	0	0	0
de	55436b7d57487	grey	0	0	0	0	0	0	4	0	0	0	0	0	0	0	0	0	0	0	0	0
de	55436b7d57487	orange	0	0	0	0	0	0	0	0	0	0	0	0	5	0	5	0	0	0	0	0
de	55436b7d57487	pink	0	5	0	0	0	5	0	0	0	0	0	0	5	0	5	0	0	0	0	0
de	55436b7d57487	purple	4	0	0	0	0	0	0	0	0	0	0	0	4	0	0	0	0	0	0	0
de	55436b7d57487	red	0	0	0	0	5	0	0	0	5	0	0	0	0	5	0	0	0	0	0	0
de	55436b7d57487	turquoise	0	3	0	0	0	0	0	0	0	0	0	3	4	0	0	0	0	0	0	0
de	55436b7d57487	white	0	0	0	0	0	4	0	0	0	0	0	5	0	0	0	4	0	5	0	0
de	55436b7d57487	yellow	0	0	0	0	0	0	0	5	0	0	0	0	0	0	0	0	0	0	0	0
de	55436e2b2067c	black	0	0	0	0	0	0	0	0	0	3	0	0	0	0	0	0	0	0	5	0
de	55436e2b2067c	blue	0	0	0	3	0	0	0	0	0	0	0	2	0	0	0	0	0	0	0	0
de	55436e2b2067c	brown	0	0	0	0	0	0	0	0	0	0	0	0	0	0	0	0	0	0	0	0
de	55436e2b2067c	green	0	0	0	0	0	0	0	0	0	0	0	0	0	0	0	0	0	0	0	0
de	55436e2b2067c	grey	0	0	0	0	0	0	3	0	0	0	0	0	0	0	0	0	3	0	0	0
de	55436e2b2067c	orange	0	0	0	0	0	0	0	0	0	0	0	0	0	0	3	0	0	0	0	0
de	55436e2b2067c	pink	0	0	0	0	0	1	0	0	0	0	0	0	0	0	0	0	0	0	0	0
de	55436e2b2067c	purple	0	0	0	0	0	0	3	0	0	0	0	0	0	0	0	0	0	0	0	3
de	55436e2b2067c	red	0	0	0	0	0	0	0	0	0	0	0	0	0	5	0	0	0	0	0	0
de	55436e2b2067c	turquoise	0	0	0	0	0	0	0	0	0	0	0	2	0	0	0	0	0	0	0	0
de	55436e2b2067c	white	0	0	0	0	0	0	0	0	0	0	0	0	0	0	0	0	0	0	0	0
de	55436e2b2067c	yellow	0	0	0	0	0	0	0	0	0	0	0	0	4	0	0	0	0	0	0	0
de	55437867b93a5	black	0	0	0	0	0	0	0	0	0	5	0	0	0	0	0	0	0	0	5	0
de	55437867b93a5	blue	0	0	0	0	0	5	0	0	0	0	0	5	0	0	4	0	0	3	0	0
de	55437867b93a5	brown	0	0	0	0	0	0	0	0	0	3	0	0	0	0	0	0	4	0	3	0
de	55437867b93a5	green	0	0	0	0	0	5	0	0	0	0	0	4	3	0	0	0	0	4	0	0
de	55437867b93a5	grey	0	0	0	0	0	0	0	0	0	0	0	0	0	0	0	0	5	0	5	3
de	55437867b93a5	orange	0	0	0	0	0	4	0	0	0	0	0	0	4	0	4	0	0	0	0	0
de	55437867b93a5	pink	0	0	0	3	0	4	0	0	0	0	0	0	0	4	0	0	0	0	0	0
de	55437867b93a5	purple	0	0	0	0	0	0	0	0	0	0	0	3	0	0	0	3	0	0	2	0
de	55437867b93a5	red	0	0	0	0	3	0	0	0	0	0	4	0	0	4	0	4	0	0	0	0
de	55437867b93a5	turquoise	3	0	0	0	0	5	0	0	0	0	0	4	0	0	4	0	0	5	0	0
de	55437867b93a5	white	5	0	0	0	0	5	0	0	0	0	0	0	0	0	0	5	0	4	0	0
de	55437867b93a5	yellow	0	0	0	0	0	0	0	0	0	0	0	3	4	0	4	0	0	2	0	0
de	554384cb0cb91	black	0	0	0	0	0	0	0	0	3	0	3	0	0	0	0	3	0	0	4	0
de	554384cb0cb91	blue	0	0	0	0	0	5	0	0	0	0	0	0	2	0	0	0	0	4	0	0
de	554384cb0cb91	brown	0	0	2	0	4	0	0	4	0	3	3	0	0	0	0	0	0	0	0	0
de	554384cb0cb91	green	0	0	0	0	0	2	0	0	0	0	0	0	3	0	3	3	2	0	0	0
de	554384cb0cb91	grey	0	0	0	0	0	0	0	0	0	3	0	0	0	0	0	0	3	0	0	0
de	554384cb0cb91	orange	0	0	3	0	0	0	0	0	0	0	3	0	3	0	4	0	0	0	0	0
de	554384cb0cb91	pink	0	0	0	0	0	0	0	3	0	0	0	0	0	2	0	0	0	0	0	2
de	554384cb0cb91	purple	0	0	0	0	0	0	0	0	0	0	0	0	0	0	0	0	0	0	0	0
de	554384cb0cb91	red	0	0	4	0	0	0	0	0	2	0	0	0	0	3	0	3	0	0	0	0
de	554384cb0cb91	turquoise	0	0	0	0	0	3	0	0	0	0	0	0	0	0	3	0	0	0	0	0
de	554384cb0cb91	white	2	0	0	2	0	0	0	0	0	0	0	0	3	0	0	3	0	0	0	0
de	554384cb0cb91	yellow	0	0	0	0	0	0	0	0	0	0	0	0	4	0	4	0	0	0	0	0
de	55438e194bf71	black	0	0	0	0	0	0	0	0	0	0	0	0	0	0	0	0	0	0	4	0
de	55438e194bf71	blue	0	0	0	0	0	0	0	0	0	0	0	3	0	0	0	0	0	0	0	0
de	55438e194bf71	brown	0	0	0	0	0	0	0	3	0	0	0	0	0	0	0	0	0	0	0	0
de	55438e194bf71	green	0	0	0	0	0	0	0	0	0	0	0	0	0	0	4	0	0	0	0	0
de	55438e194bf71	grey	0	0	0	0	0	0	0	0	0	0	0	0	0	0	0	0	3	0	0	0
de	55438e194bf71	orange	0	4	0	0	0	0	0	0	0	0	0	0	0	0	0	0	0	0	0	0
de	55438e194bf71	pink	0	4	0	0	0	0	0	0	0	0	0	0	0	0	0	0	0	0	0	0
de	55438e194bf71	purple	3	0	0	0	0	0	0	0	0	0	0	0	0	0	0	0	0	0	0	0
de	55438e194bf71	red	0	0	0	0	0	0	0	0	0	0	0	0	0	5	0	0	0	0	0	0
de	55438e194bf71	turquoise	0	0	0	0	0	2	0	0	0	0	0	0	0	0	0	0	0	0	0	0
de	55438e194bf71	white	0	0	0	0	0	0	0	0	0	0	0	0	0	0	0	0	0	3	0	0
de	55438e194bf71	yellow	0	0	0	0	0	0	0	0	0	0	0	0	4	0	0	0	0	0	0	0
de	55449bf8efd4f	black	0	0	0	0	1	0	2	0	2	4	5	0	0	0	0	0	0	0	5	0
de	55449bf8efd4f	blue	0	0	0	0	0	0	0	0	0	0	0	0	0	0	0	0	3	0	0	0
de	55449bf8efd4f	brown	0	0	0	0	0	0	0	0	0	0	0	0	0	0	0	0	0	0	0	0
de	55449bf8efd4f	green	0	0	0	0	0	5	0	0	0	0	0	4	4	0	4	0	0	5	0	0
de	55449bf8efd4f	grey	0	0	0	0	0	0	5	0	4	0	0	0	0	0	0	0	4	0	0	0
de	55449bf8efd4f	orange	0	3	0	0	0	0	0	0	0	0	0	0	2	0	2	0	0	0	0	0
de	55449bf8efd4f	pink	0	0	0	0	0	0	0	0	0	0	0	0	0	4	2	0	0	0	0	0
de	55449bf8efd4f	purple	0	0	0	5	0	0	0	0	0	0	0	0	0	0	0	0	0	0	0	2
de	55449bf8efd4f	red	0	0	0	0	4	0	0	0	0	0	3	0	0	4	0	0	0	0	0	1
de	55449bf8efd4f	turquoise	0	3	0	0	0	2	0	0	0	0	0	0	4	0	0	0	0	0	0	0
de	55449bf8efd4f	white	4	0	0	0	0	4	0	0	0	0	0	4	0	0	0	0	0	5	0	0
de	55449bf8efd4f	yellow	0	0	0	0	3	0	0	0	0	0	0	0	2	0	0	0	0	0	0	0
de	554643c323839	black	0	0	0	0	5	0	0	0	5	0	5	0	0	0	0	0	0	0	4	0
de	554643c323839	blue	0	0	0	0	0	0	0	0	0	0	0	0	5	0	0	0	0	5	0	0
de	554643c323839	brown	0	0	0	0	0	0	0	0	0	0	0	0	0	0	0	0	0	0	0	0
de	554643c323839	green	0	0	0	0	0	4	0	0	0	0	0	0	4	0	0	0	0	0	0	0
de	554643c323839	grey	0	0	0	0	0	0	3	0	0	0	0	0	0	0	0	0	0	0	0	2
de	554643c323839	orange	0	3	0	0	0	3	0	0	0	0	0	0	3	0	3	0	0	0	0	0
de	554643c323839	pink	0	3	0	0	0	2	0	0	0	0	0	0	2	3	2	0	0	2	0	0
de	554643c323839	purple	0	0	0	0	0	5	0	0	0	0	0	0	0	0	0	0	0	0	0	0
de	554643c323839	red	0	0	0	0	0	0	0	0	0	0	5	0	0	4	0	0	0	0	0	0
de	554643c323839	turquoise	0	4	0	0	0	4	0	0	0	0	0	0	5	0	0	0	0	0	0	0
de	554643c323839	white	0	0	0	0	0	0	0	0	0	0	0	0	0	0	0	0	0	4	0	0
de	554643c323839	yellow	0	1	0	0	0	0	0	3	0	0	0	0	0	0	1	0	0	0	0	0
de	5547118b66f16	black	0	0	0	0	0	0	5	0	5	0	0	0	0	0	0	0	0	0	5	0
de	5547118b66f16	blue	0	0	0	4	0	4	0	0	0	0	0	0	0	0	0	0	0	0	0	0
de	5547118b66f16	brown	0	0	0	0	0	0	0	3	0	5	0	0	0	0	0	0	0	0	0	0
de	5547118b66f16	green	0	0	0	0	0	0	0	0	0	0	0	5	0	0	0	5	0	0	0	0
de	5547118b66f16	grey	0	0	0	0	0	0	0	0	0	0	4	0	0	0	0	0	4	0	0	0
de	5547118b66f16	orange	0	0	0	0	0	5	0	0	0	0	0	0	5	5	0	0	0	0	0	0
de	5547118b66f16	pink	0	3	0	4	0	0	0	0	0	0	0	0	0	0	4	0	0	0	0	0
de	5547118b66f16	purple	0	0	3	3	0	0	0	0	0	0	0	0	0	0	0	0	0	0	0	0
de	5547118b66f16	red	0	0	0	0	0	0	0	0	4	0	0	0	5	5	0	0	0	0	0	0
de	5547118b66f16	turquoise	0	0	0	0	0	5	0	0	0	0	0	0	5	0	0	0	0	0	0	0
de	5547118b66f16	white	4	0	0	0	0	0	0	0	0	0	0	0	0	0	0	0	0	5	0	0
de	5547118b66f16	yellow	5	0	0	0	0	0	0	0	0	0	0	5	0	0	0	0	0	0	0	0
de	554889b4bef45	black	0	0	5	0	5	0	0	0	0	0	5	0	0	0	0	0	0	0	0	0
de	554889b4bef45	blue	0	0	0	0	0	0	0	0	0	0	0	0	0	0	0	5	0	0	0	0
de	554889b4bef45	brown	4	0	0	0	0	5	0	0	0	0	0	0	0	0	0	0	0	0	0	0
de	554889b4bef45	green	0	0	0	0	0	0	0	0	0	0	0	0	0	0	0	0	4	0	5	0
de	554889b4bef45	grey	0	0	0	0	0	0	0	0	0	4	0	0	0	0	0	0	4	0	5	0
de	554889b4bef45	orange	0	0	0	0	0	0	5	0	0	0	0	0	0	0	0	0	0	0	0	4
de	554889b4bef45	pink	0	0	0	0	0	4	0	0	0	0	0	0	5	0	4	0	0	0	0	0
de	554889b4bef45	purple	0	0	0	0	0	5	0	0	0	0	0	0	0	0	0	0	0	4	0	0
de	554889b4bef45	red	0	0	0	0	0	0	0	0	5	0	0	0	0	0	0	0	0	0	0	0
de	554889b4bef45	turquoise	0	0	0	0	0	0	0	0	0	0	0	0	0	0	0	0	0	5	0	0
de	554889b4bef45	white	0	0	0	5	0	0	0	0	0	0	0	0	0	0	0	0	0	4	0	0
de	554889b4bef45	yellow	0	0	0	0	0	0	5	4	0	0	0	0	0	0	0	0	0	0	0	4
de	5548d31c7f39c	black	0	0	5	0	0	0	0	4	0	4	5	0	0	0	0	0	3	0	5	0
de	5548d31c7f39c	blue	1	0	0	0	0	3	0	0	0	0	0	3	0	0	0	3	0	0	0	0
de	5548d31c7f39c	brown	0	0	1	0	2	0	1	2	1	0	1	0	0	0	0	0	0	0	0	1
de	5548d31c7f39c	green	0	2	0	0	0	2	0	0	0	0	0	4	2	0	2	0	0	4	0	0
de	5548d31c7f39c	grey	0	0	2	0	2	0	0	0	0	3	2	0	0	0	0	0	3	0	3	0
de	5548d31c7f39c	orange	0	2	0	0	0	0	0	0	1	0	0	2	4	0	4	0	0	2	0	0
de	5548d31c7f39c	pink	0	0	0	0	0	0	0	0	0	0	0	0	0	0	0	0	0	0	0	0
de	5548d31c7f39c	purple	0	0	0	0	0	0	0	0	0	0	0	0	0	0	0	0	0	2	0	0
de	5548d31c7f39c	red	0	0	0	0	0	0	0	0	3	0	0	0	2	5	3	0	0	0	0	0
de	5548d31c7f39c	turquoise	0	0	0	0	0	2	0	0	0	0	0	0	0	0	2	0	0	3	0	0
de	5548d31c7f39c	white	0	0	0	0	0	0	0	0	0	0	0	0	0	0	0	0	0	5	0	0
de	5548d31c7f39c	yellow	0	2	0	0	0	1	0	0	0	0	0	2	4	0	4	0	0	0	0	0
de	5548f374453e9	black	0	0	0	0	0	0	0	0	0	0	0	0	0	0	0	0	0	0	3	0
de	5548f374453e9	blue	0	0	0	0	0	2	0	0	0	0	0	0	0	0	0	0	0	0	0	0
de	5548f374453e9	brown	0	0	0	0	1	0	0	1	0	0	0	0	0	0	0	0	0	0	0	0
de	5548f374453e9	green	0	0	0	0	0	3	0	0	0	0	0	1	2	0	2	0	0	0	0	0
de	5548f374453e9	grey	0	0	0	0	0	0	0	0	0	0	0	0	0	0	0	0	0	0	0	0
de	5548f374453e9	orange	0	0	0	0	0	1	0	0	0	0	0	0	3	0	3	0	0	0	0	0
de	5548f374453e9	pink	0	2	0	0	0	0	0	0	0	0	0	0	0	0	0	0	0	0	0	0
de	5548f374453e9	purple	0	0	0	0	0	0	0	0	0	0	0	0	3	0	3	0	0	0	0	0
de	5548f374453e9	red	0	0	3	0	0	4	0	0	0	0	0	0	0	5	0	0	0	0	0	2
de	5548f374453e9	turquoise	0	0	0	0	0	0	0	0	0	0	0	0	1	0	1	0	0	0	0	0
de	5548f374453e9	white	0	0	0	0	0	0	0	0	0	0	0	0	0	0	0	0	0	0	0	0
de	5548f374453e9	yellow	0	0	0	0	0	0	0	1	0	0	0	0	2	0	2	0	0	0	0	0
de	5548fbbd74a70	black	0	0	0	0	0	0	0	0	0	0	0	0	0	0	0	0	0	0	5	0
de	5548fbbd74a70	blue	0	0	0	0	0	0	0	0	0	0	0	0	0	0	0	0	0	0	0	0
de	5548fbbd74a70	brown	0	0	0	0	0	0	0	0	0	0	5	0	0	0	0	0	0	0	0	0
de	5548fbbd74a70	green	0	0	0	0	0	0	0	0	0	0	0	5	0	0	5	0	0	5	0	0
de	5548fbbd74a70	grey	0	0	0	0	0	0	3	0	0	0	0	0	0	0	0	0	1	0	0	0
de	5548fbbd74a70	orange	0	0	0	0	0	0	0	0	0	0	0	0	0	0	0	0	0	0	0	0
de	5548fbbd74a70	pink	0	0	0	0	0	0	0	0	0	0	0	0	0	4	0	0	0	0	0	0
de	5548fbbd74a70	purple	0	0	0	0	0	0	0	0	0	0	0	0	5	0	0	0	0	0	0	0
de	5548fbbd74a70	red	0	0	5	0	0	0	0	0	0	0	0	0	0	3	0	0	0	0	0	0
de	5548fbbd74a70	turquoise	0	0	0	0	0	0	0	0	0	0	0	0	0	0	0	0	0	0	0	0
de	5548fbbd74a70	white	0	0	0	0	0	0	0	0	0	0	0	0	0	0	0	0	0	0	0	0
de	5548fbbd74a70	yellow	3	0	0	0	0	3	0	0	0	0	0	0	5	0	0	0	0	0	0	0
de	55491e7e6038f	black	0	0	0	0	0	0	0	0	0	0	0	0	0	0	0	5	0	0	5	0
de	55491e7e6038f	blue	0	0	2	0	0	0	2	0	0	0	0	0	0	0	0	0	0	0	0	0
de	55491e7e6038f	brown	0	0	0	0	4	0	0	0	0	0	5	0	0	0	0	0	0	0	0	4
de	55491e7e6038f	green	0	0	0	0	0	5	0	3	0	0	0	4	4	0	0	0	0	0	0	0
de	55491e7e6038f	grey	0	0	0	0	0	0	4	0	0	0	0	0	0	0	0	0	0	0	0	0
de	55491e7e6038f	orange	0	0	0	0	0	3	0	0	0	0	0	3	5	0	0	0	0	0	0	0
de	55491e7e6038f	pink	0	5	0	0	0	0	0	0	0	0	0	0	0	0	3	0	0	0	0	0
de	55491e7e6038f	purple	0	0	0	0	0	0	0	0	0	0	0	4	0	0	0	0	0	0	0	0
de	55491e7e6038f	red	0	0	3	0	0	0	0	0	0	0	0	0	0	4	0	5	0	0	0	0
de	55491e7e6038f	turquoise	0	0	0	0	0	0	0	0	0	0	0	0	0	0	0	0	0	3	0	0
de	55491e7e6038f	white	0	0	0	0	0	5	0	0	0	0	0	0	0	0	0	0	0	0	0	0
de	55491e7e6038f	yellow	0	0	0	0	0	0	0	0	0	0	0	0	4	0	0	0	0	0	0	0
de	554a1ba540ca2	black	0	0	0	0	0	0	0	0	0	0	0	0	0	0	0	5	0	0	5	0
de	554a1ba540ca2	blue	0	0	0	0	0	0	0	0	0	0	0	0	0	5	0	0	0	5	0	0
de	554a1ba540ca2	brown	0	0	0	2	0	0	0	0	0	0	0	0	0	0	0	0	0	0	0	0
de	554a1ba540ca2	green	0	5	0	5	0	0	0	0	0	0	0	0	0	0	0	0	0	5	0	0
de	554a1ba540ca2	grey	0	0	0	0	5	0	5	0	0	0	0	0	0	0	0	0	5	0	0	0
de	554a1ba540ca2	orange	0	5	0	0	0	0	0	0	0	0	0	3	0	0	0	0	0	0	0	0
de	554a1ba540ca2	pink	0	0	0	0	0	0	0	0	0	0	0	5	5	0	0	0	0	5	0	0
de	554a1ba540ca2	purple	0	0	0	0	0	0	0	0	0	0	0	0	0	0	5	0	0	5	0	0
de	554a1ba540ca2	red	3	0	0	0	0	0	0	0	0	0	0	0	5	5	0	5	0	0	0	0
de	554a1ba540ca2	turquoise	0	5	0	0	0	0	0	0	0	0	0	0	0	0	5	0	0	0	0	0
de	554a1ba540ca2	white	5	0	0	5	0	0	0	0	5	0	0	0	0	0	0	0	0	0	5	0
de	554a1ba540ca2	yellow	0	0	0	0	0	5	0	0	0	0	0	4	5	0	0	0	0	0	0	0
de	5551c64f5cd45	black	0	0	0	0	3	0	4	0	2	4	2	0	0	0	0	0	0	0	1	0
de	5551c64f5cd45	blue	0	0	0	4	0	5	0	0	0	0	0	0	3	0	0	4	0	0	2	0
de	5551c64f5cd45	brown	0	0	0	0	2	0	2	5	0	2	0	0	0	0	0	0	2	0	0	0
de	5551c64f5cd45	green	0	2	0	0	0	5	0	0	0	0	0	3	4	2	2	5	0	4	0	0
de	5551c64f5cd45	grey	0	0	0	0	0	0	5	0	0	2	0	0	0	0	0	0	0	0	0	0
de	5551c64f5cd45	orange	0	0	0	0	0	0	0	0	0	0	0	2	3	0	2	0	0	3	0	0
de	5551c64f5cd45	pink	4	0	0	0	0	2	0	0	0	0	0	0	4	1	4	3	0	4	0	0
de	5551c64f5cd45	purple	0	3	2	0	0	0	0	0	0	0	0	0	2	0	5	5	0	0	0	0
de	5551c64f5cd45	red	0	0	4	0	0	0	0	0	0	0	2	0	0	4	0	4	0	0	0	0
de	5551c64f5cd45	turquoise	0	0	0	0	0	0	0	0	0	0	0	0	0	0	0	0	0	0	0	0
de	5551c64f5cd45	white	3	0	0	4	0	0	0	0	0	0	0	0	0	0	0	0	0	2	0	0
de	5551c64f5cd45	yellow	2	0	0	0	0	0	0	0	0	0	0	0	4	0	0	3	0	4	0	0
de	5551c6dd671ad	black	0	0	0	4	5	0	0	0	4	0	3	0	0	0	0	0	3	0	5	0
de	5551c6dd671ad	blue	0	0	0	0	0	3	0	0	0	0	0	4	0	0	2	0	0	5	0	0
de	5551c6dd671ad	brown	0	0	2	0	3	0	4	5	2	5	4	0	0	0	0	0	5	0	4	3
de	5551c6dd671ad	green	0	0	0	0	0	3	0	3	0	0	0	0	4	0	5	0	0	0	0	0
de	5551c6dd671ad	grey	0	0	0	0	0	0	2	0	4	0	0	4	0	0	0	0	4	0	0	0
de	5551c6dd671ad	orange	0	0	0	0	0	0	0	0	0	0	0	0	0	0	0	0	0	0	0	0
de	5551c6dd671ad	pink	0	4	0	0	0	0	0	3	0	0	0	0	0	0	0	0	0	2	0	0
de	5551c6dd671ad	purple	0	0	0	0	0	3	0	5	0	0	0	0	0	2	0	0	0	0	0	4
de	5551c6dd671ad	red	2	0	4	0	0	2	0	0	0	3	3	0	4	5	3	0	0	0	0	0
de	5551c6dd671ad	turquoise	0	0	0	0	0	0	0	0	0	0	0	0	0	0	0	0	0	0	0	0
de	5551c6dd671ad	white	0	0	0	3	0	4	0	0	0	0	0	0	0	0	0	4	0	5	5	0
de	5551c6dd671ad	yellow	0	0	0	0	0	0	0	4	0	0	0	0	0	0	0	0	0	0	2	3
de	5551c722115b9	black	0	0	5	0	5	0	5	0	4	4	5	0	0	0	0	0	3	0	5	0
de	5551c722115b9	blue	3	0	0	0	0	0	0	0	0	0	0	0	2	2	2	0	0	0	0	0
de	5551c722115b9	brown	0	0	0	0	3	0	2	0	0	0	2	0	0	0	0	0	0	0	0	0
de	5551c722115b9	green	0	3	0	0	0	5	0	0	0	0	0	4	4	0	4	3	0	0	0	0
de	5551c722115b9	grey	0	0	0	0	0	0	4	0	1	0	0	0	0	0	0	0	0	0	3	0
de	5551c722115b9	orange	0	0	0	0	2	3	0	1	0	0	0	0	0	0	4	0	0	0	0	0
de	5551c722115b9	pink	0	3	0	3	0	3	0	0	0	0	0	1	3	4	0	0	0	0	0	0
de	5551c722115b9	purple	0	0	0	0	0	0	0	0	0	0	0	0	0	0	0	0	0	0	0	0
de	5551c722115b9	red	0	0	5	0	0	0	0	0	2	0	4	0	4	4	0	0	0	0	0	0
de	5551c722115b9	turquoise	0	0	0	0	0	5	0	0	0	0	0	4	3	0	3	0	0	0	0	0
de	5551c722115b9	white	2	0	0	3	0	2	0	0	0	0	0	1	4	3	3	4	0	0	0	0
de	5551c722115b9	yellow	0	0	2	0	4	0	2	0	2	3	3	0	0	0	0	0	2	0	0	0
de	5551c97ec7503	black	0	0	5	0	5	0	5	5	5	0	5	0	0	0	0	0	0	0	0	4
de	5551c97ec7503	blue	4	0	0	0	0	5	0	0	0	0	0	0	5	0	0	0	0	5	0	0
de	5551c97ec7503	brown	0	0	5	0	5	0	3	5	0	0	5	0	0	0	0	0	4	0	0	3
de	5551c97ec7503	green	5	0	0	0	0	5	0	0	0	0	0	0	5	0	5	0	0	5	0	0
de	5551c97ec7503	grey	0	0	4	0	4	0	0	3	0	4	4	0	0	0	0	0	5	0	0	0
de	5551c97ec7503	orange	0	0	0	0	0	0	0	0	0	0	0	0	0	0	0	0	0	0	0	0
de	5551c97ec7503	pink	0	0	0	4	0	0	0	0	0	0	0	0	0	5	0	0	0	0	0	5
de	5551c97ec7503	purple	0	0	0	0	0	0	0	0	0	0	0	0	0	0	0	0	0	0	0	0
de	5551c97ec7503	red	0	0	5	0	0	0	4	0	5	5	5	0	0	5	0	0	0	0	0	5
de	5551c97ec7503	turquoise	5	0	0	0	0	4	0	0	0	0	0	0	5	0	0	0	0	5	0	0
de	5551c97ec7503	white	0	0	0	0	0	0	0	0	0	0	0	0	0	0	0	0	0	0	0	0
de	5551c97ec7503	yellow	0	3	0	4	0	0	0	0	0	0	0	4	0	0	0	3	0	4	0	0
de	5551ca4797541	black	0	0	0	0	0	0	0	0	5	2	0	0	0	0	0	0	2	0	4	3
de	5551ca4797541	blue	0	0	0	0	0	0	0	0	0	0	0	4	0	0	0	5	0	0	0	0
de	5551ca4797541	brown	0	0	0	0	0	0	0	5	4	0	0	0	0	0	0	0	0	0	0	0
de	5551ca4797541	green	0	0	0	0	0	0	0	0	0	0	0	0	0	0	0	0	0	5	0	0
de	5551ca4797541	grey	0	0	0	0	0	0	5	0	0	0	0	0	0	0	0	0	0	0	0	0
de	5551ca4797541	orange	0	0	0	0	0	0	0	0	0	0	0	0	3	0	5	0	0	0	0	0
de	5551ca4797541	pink	0	0	0	5	0	0	0	0	0	0	0	0	0	5	0	0	0	0	0	0
de	5551ca4797541	purple	0	0	0	5	0	0	0	0	0	0	0	0	0	4	0	0	0	3	0	0
de	5551ca4797541	red	0	0	5	0	4	0	0	0	0	0	5	0	0	0	0	0	0	0	0	0
de	5551ca4797541	turquoise	0	0	0	0	0	0	0	0	0	0	0	0	0	0	5	0	0	0	0	0
de	5551ca4797541	white	0	0	0	0	0	4	0	0	0	0	0	0	0	0	0	0	0	4	0	0
de	5551ca4797541	yellow	0	0	0	0	0	0	0	0	0	0	0	0	4	0	4	0	0	0	0	0
de	5551cca3d7674	black	0	0	0	0	0	0	0	0	0	0	5	0	0	0	0	0	0	0	5	0
de	5551cca3d7674	blue	0	0	0	0	0	0	0	0	0	0	0	0	3	0	0	0	0	3	0	0
de	5551cca3d7674	brown	0	0	0	0	0	0	0	0	0	0	0	0	0	0	0	0	4	0	0	0
de	5551cca3d7674	green	0	0	0	0	0	0	0	0	0	0	0	0	0	0	0	0	0	4	0	0
de	5551cca3d7674	grey	0	0	0	0	3	0	5	0	0	0	0	0	0	0	0	0	0	0	0	0
de	5551cca3d7674	orange	0	4	0	0	0	0	0	0	0	0	0	0	0	0	0	0	0	0	0	0
de	5551cca3d7674	pink	0	0	0	0	0	4	0	0	0	0	0	0	0	3	0	0	0	0	0	0
de	5551cca3d7674	purple	0	0	0	0	0	0	0	0	0	0	0	0	5	0	5	0	0	0	0	0
de	5551cca3d7674	red	0	0	5	0	0	0	0	0	0	0	0	0	0	0	0	0	0	0	0	0
de	5551cca3d7674	turquoise	0	0	0	0	0	0	0	0	0	0	0	0	4	0	0	0	0	0	0	0
de	5551cca3d7674	white	0	0	0	0	0	0	0	0	0	0	0	0	0	0	0	0	0	4	0	0
de	5551cca3d7674	yellow	0	0	0	0	0	0	0	2	0	3	0	0	0	0	0	0	0	0	0	0
de	5551cd3fc2258	black	0	0	0	0	0	0	0	0	0	0	0	0	0	0	0	4	0	0	5	0
de	5551cd3fc2258	blue	0	0	0	0	0	5	0	0	0	0	0	0	0	0	0	0	0	4	0	0
de	5551cd3fc2258	brown	0	0	0	0	0	0	0	5	0	0	0	0	0	0	0	0	0	0	0	4
de	5551cd3fc2258	green	0	0	0	0	0	0	0	0	0	0	0	5	5	0	5	0	0	0	0	0
de	5551cd3fc2258	grey	0	0	0	0	0	0	5	0	0	0	0	0	0	0	0	0	0	0	0	0
de	5551cd3fc2258	orange	0	0	0	0	0	5	0	0	0	0	0	0	4	0	4	0	0	0	0	0
de	5551cd3fc2258	pink	0	0	0	5	0	5	0	0	0	0	0	0	0	5	0	0	0	0	0	0
de	5551cd3fc2258	purple	0	0	0	0	0	0	0	0	0	0	0	0	0	0	0	0	0	0	0	0
de	5551cd3fc2258	red	0	0	0	0	0	0	0	0	0	0	0	0	0	5	4	0	0	0	0	0
de	5551cd3fc2258	turquoise	0	5	0	0	0	0	0	0	0	0	0	0	4	0	5	0	0	0	0	0
de	5551cd3fc2258	white	0	0	0	0	0	0	0	0	0	0	0	5	0	0	0	0	0	5	0	0
de	5551cd3fc2258	yellow	0	5	0	0	0	5	0	0	0	0	0	4	4	0	5	0	0	0	0	0
de	5551cd5a83edd	black	0	0	0	0	0	0	0	0	0	0	0	5	0	0	0	0	0	0	0	0
de	5551cd5a83edd	blue	0	0	0	3	0	5	0	0	0	3	0	0	4	0	4	0	3	0	5	0
de	5551cd5a83edd	brown	0	0	0	0	3	0	3	4	0	0	0	0	0	0	0	0	0	0	0	0
de	5551cd5a83edd	green	0	0	0	0	0	5	0	0	0	0	0	0	4	0	3	0	0	0	0	0
de	5551cd5a83edd	grey	0	0	0	0	3	0	0	0	0	0	0	4	0	0	0	0	0	0	0	0
de	5551cd5a83edd	orange	0	0	0	0	0	0	0	0	0	0	0	0	0	0	0	0	0	0	0	2
de	5551cd5a83edd	pink	0	0	0	0	0	0	0	0	0	0	0	0	0	3	0	0	0	4	0	2
de	5551cd5a83edd	purple	0	0	0	0	0	0	0	0	0	0	0	0	0	2	0	0	0	3	0	3
de	5551cd5a83edd	red	0	0	5	0	3	0	0	0	0	0	5	0	0	5	0	0	0	0	0	0
de	5551cd5a83edd	turquoise	5	3	0	0	0	5	0	0	0	0	0	0	4	0	5	0	0	3	0	0
de	5551cd5a83edd	white	4	0	0	0	0	0	0	0	0	0	0	0	0	0	0	4	0	0	0	0
de	5551cd5a83edd	yellow	0	5	0	0	0	0	0	0	0	0	0	0	0	0	0	0	0	0	0	0
de	5551cedf0165b	black	0	0	0	0	0	0	3	0	3	3	0	0	0	0	0	0	3	0	5	0
de	5551cedf0165b	blue	0	0	0	5	0	0	0	0	0	0	0	0	0	0	0	0	0	0	5	0
de	5551cedf0165b	brown	0	0	0	0	3	0	0	4	0	0	0	0	0	0	0	0	0	0	0	0
de	5551cedf0165b	green	0	0	0	0	0	5	0	0	0	0	0	4	0	0	4	0	0	0	0	0
de	5551cedf0165b	grey	0	0	0	0	0	0	4	0	0	3	0	0	0	0	0	0	0	0	4	3
de	5551cedf0165b	orange	0	0	4	0	0	0	0	0	2	0	2	0	0	0	0	0	0	0	0	0
de	5551cedf0165b	pink	0	0	0	0	0	2	0	0	0	0	0	0	0	5	0	0	0	0	0	0
de	5551cedf0165b	purple	0	0	0	0	0	0	1	0	0	0	0	0	0	0	0	0	4	0	0	0
de	5551cedf0165b	red	0	0	5	0	0	0	0	0	0	0	0	0	0	3	0	0	0	0	0	0
de	5551cedf0165b	turquoise	0	0	0	0	0	5	0	0	0	0	0	0	0	0	4	0	0	0	0	0
de	5551cedf0165b	white	0	0	0	0	0	0	0	0	0	0	0	0	0	0	0	5	0	4	0	0
de	5551cedf0165b	yellow	0	3	0	0	0	0	0	0	0	0	0	0	5	0	4	0	0	0	0	0
de	5551d8049eee3	black	0	0	0	0	5	0	4	3	4	5	5	0	0	0	0	0	5	0	5	3
de	5551d8049eee3	blue	0	0	0	0	0	0	0	0	0	0	0	0	5	0	4	0	0	5	4	0
de	5551d8049eee3	brown	0	0	0	0	4	0	5	4	0	0	0	0	0	0	0	0	2	0	0	5
de	5551d8049eee3	green	0	4	0	0	0	5	0	4	0	0	0	0	5	3	0	0	0	0	0	0
de	5551d8049eee3	grey	0	0	0	0	3	0	5	0	4	4	0	0	0	0	0	0	3	0	0	0
de	5551d8049eee3	orange	0	0	0	0	0	4	0	0	0	0	0	0	5	0	4	3	0	0	0	0
de	5551d8049eee3	pink	0	0	0	5	0	5	0	0	0	0	0	4	0	3	4	0	0	0	0	0
de	5551d8049eee3	purple	0	0	0	0	0	3	0	0	0	0	0	0	0	0	0	0	0	3	0	0
de	5551d8049eee3	red	0	0	5	0	0	0	0	0	0	5	0	0	4	5	0	0	0	0	0	0
de	5551d8049eee3	turquoise	0	0	0	5	0	5	0	0	0	0	0	5	5	0	0	0	0	5	0	0
de	5551d8049eee3	white	0	0	0	3	0	5	0	0	0	0	0	0	0	0	0	0	0	5	0	0
de	5551d8049eee3	yellow	0	0	4	0	4	0	2	0	5	0	4	0	5	0	0	5	0	0	0	0
de	5551dbde37a91	black	0	0	5	0	0	0	5	0	5	0	5	0	0	0	0	0	0	0	5	0
de	5551dbde37a91	blue	0	0	0	0	0	0	0	0	0	0	0	4	0	0	0	0	0	0	0	0
de	5551dbde37a91	brown	0	0	4	0	0	0	0	4	0	0	4	0	0	0	0	0	0	0	0	0
de	5551dbde37a91	green	0	0	0	0	0	5	0	0	0	0	0	0	5	0	5	0	0	0	0	0
de	5551dbde37a91	grey	0	0	0	0	0	0	4	0	0	4	0	0	0	0	0	0	0	0	3	0
de	5551dbde37a91	orange	0	0	0	0	0	4	0	0	0	0	0	4	4	0	4	0	0	0	0	0
de	5551dbde37a91	pink	0	0	0	0	0	3	0	0	0	0	0	0	3	0	2	0	0	0	0	0
de	5551dbde37a91	purple	0	0	0	0	0	0	0	0	0	0	0	0	0	0	0	0	0	0	0	4
de	5551dbde37a91	red	0	0	5	0	0	0	0	0	0	0	0	0	0	5	0	0	0	0	0	0
de	5551dbde37a91	turquoise	0	0	0	0	0	0	0	0	0	0	0	0	0	0	0	0	0	0	0	0
de	5551dbde37a91	white	0	0	0	0	0	0	0	0	0	0	0	0	0	0	0	0	0	0	3	0
de	5551dbde37a91	yellow	0	0	0	0	0	3	0	0	0	0	0	0	0	0	0	0	0	0	0	0
de	5551dc5c809a7	black	0	0	0	0	2	0	0	0	4	4	4	0	0	0	0	0	2	0	5	0
de	5551dc5c809a7	blue	0	0	0	0	0	4	0	0	0	0	0	0	0	0	0	5	0	4	0	0
de	5551dc5c809a7	brown	0	0	0	0	0	0	0	2	0	0	5	0	0	0	0	0	4	0	0	4
de	5551dc5c809a7	green	0	0	0	3	0	5	0	0	0	0	0	4	3	0	3	2	0	2	0	0
de	5551dc5c809a7	grey	0	0	0	0	0	0	5	0	0	2	0	0	0	0	0	0	3	0	5	0
de	5551dc5c809a7	orange	0	0	0	4	0	4	0	0	0	0	0	0	0	0	4	0	0	0	0	0
de	5551dc5c809a7	pink	0	0	0	2	0	0	0	0	0	0	0	0	0	3	0	0	0	0	0	0
[truncated: 6,533 more rows]
