# Supplementary material for: A machine learning approach to quantify the specificity of colour–emotion associations and their cultural differences
Source: PubMed Central journal article supplement (PMC6774957; doi:10.1098/rsos.190741), 2019-09-25
Supplement: rsos190741supp2.pdf [file rsos190741supp2.pdf]

Description of the data set for the manuscript "**A machine learning approach to quantify the specificity of color-emotion associations and their cultural differences**", Royal Society Open Science, by Domicela Jonauskaitė, Jörg Wicker, Christine Mohr, Nele Dael, Jelena Havelka, Marietta Papadatou-Pastou, Meng Zhang, and Daniel Oberfeld ([oberfeld@uni-mainz.de](mailto:oberfeld@uni-mainz.de))

Each row represents the ratings of the intensity of 20 emotions associated with the color term given by variable "color", by participant identified by variable "subject"

**Variables:**

*lang*: language in which the survey was presented = mother tongue = country of origin. CN = China, DE = Germany, GB = United Kingdom, GR = Greece,

*subject*: code for the participant

*color*: color term

*admiration to shame*: ratings of emotion intensity. 0 = no association between the color term and a given emotion. 5 = strongest intensity of an associated emotion.
